1                   The genomics of local adaptation in trees:  
2                   Are we out of the woods yet?

3                   Brandon M. Lind\*, Mitra Menon\*, Constance E. Bolte\*<sup>†</sup>,  
4                   Trevor M. Faske<sup>†</sup>, and Andrew J. Eckert<sup>†</sup>

5                   \*Integrative Life Sciences, Virginia Commonwealth University, Richmond, Virginia 23284 USA

6                   <sup>†</sup>Department of Biology, Virginia Commonwealth University, Richmond, Virginia 23284 USA

7                   Dec 22, 2017

8                   Running Title: Are we out of the woods yet?

9                   Keywords:

10                  trees, GWAS, genetic architecture, polygenic local adaptation

## 11 **Abstract**

12 There is substantial interest in uncovering the genetic basis of the traits underlying adaptive  
13 responses in tree species, as this information will ultimately aid conservation and industrial  
14 endeavors across populations, generations, and environments. Fundamentally, the  
15 characterization of such genetic bases is within the context of a genetic architecture, which  
16 describes the multidimensional relationship between genotype and phenotype through the  
17 identification of causative variants, their relative location within a genome, expression,  
18 pleiotropic effect, environmental influence, and degree of dominance, epistasis, and additivity.  
19 Here, we review theory related to polygenic local adaptation and contextualize these  
20 expectations with methods often used to uncover the genetic basis of traits important to tree  
21 conservation and industry. A broad literature survey suggests that most tree traits generally  
22 exhibit considerable heritability, that underlying quantitative genetic variation ( $Q_{ST}$ ) is structured  
23 more so across populations than neutral expectations ( $F_{ST}$ ) in 69% of comparisons across the  
24 literature, and that single-locus associations often exhibit small estimated per-locus effects.  
25 Together, these results suggest differential selection across populations often acts on tree  
26 phenotypes underlain by polygenic architectures consisting of numerous small to moderate  
27 effect loci. Using this synthesis, we highlight the limits of using solely single-locus approaches to  
28 describe underlying genetic architectures and close by addressing hurdles and promising  
29 alternatives towards such goals, remark upon the current state of tree genomics, and identify  
30 future directions for this field. Importantly, we argue, the success of future endeavors should not  
31 be predicated on the shortcomings of past studies and will instead be dependent upon the  
32 application of theory to empiricism, standardized reporting, centralized open-access databases,  
33 and continual input and review of the community's research.

## 34 Table Of Contents

|    |                                                                                                 |    |
|----|-------------------------------------------------------------------------------------------------|----|
| 35 | <b>The genomics of local adaptation in trees: Are we out of the woods yet?</b> .....            | i  |
| 36 | Keywords:.....                                                                                  | i  |
| 37 | <b>Abstract</b> .....                                                                           | ii |
| 38 | <b>Introduction</b> .....                                                                       | 1  |
| 39 | <b>Identifying heritable phenotypic variation</b> .....                                         | 4  |
| 40 | <b>Expectations for the loci underlying quantitative traits</b> .....                           | 10 |
| 41 | Gene action.....                                                                                | 12 |
| 42 | Negative selection.....                                                                         | 17 |
| 43 | Positive selection.....                                                                         | 19 |
| 44 | Gene flow.....                                                                                  | 22 |
| 45 | Summary.....                                                                                    | 24 |
| 46 | <b>The genomics of local adaptation in trees</b> .....                                          | 25 |
| 47 | Common approaches used to identify adaptive loci.....                                           | 25 |
| 48 | Current progress in trees.....                                                                  | 26 |
| 49 | Are we out of the woods yet?.....                                                               | 27 |
| 50 | <b>The Path Forward</b> .....                                                                   | 30 |
| 51 | Stepping off the path – what’s in our pack?.....                                                | 30 |
| 52 | At the trail junction – where to next?.....                                                     | 34 |
| 53 | <b>Concluding Remarks</b> .....                                                                 | 43 |
| 54 | <b>Acknowledgements</b> .....                                                                   | 43 |
| 55 | <b>References</b> .....                                                                         | 45 |
| 56 | <b>Author Contributions</b> .....                                                               | 74 |
| 57 | <b>Figures</b> .....                                                                            | 75 |
| 58 | Figure 1.....                                                                                   | 75 |
| 59 | Figure 2.....                                                                                   | 76 |
| 60 | Figure 3A.....                                                                                  | 77 |
| 61 | Figure 3B.....                                                                                  | 78 |
| 62 | <b>Tables</b> .....                                                                             | 79 |
| 63 | Table 1. Where to next? The Path Forward identifies meaningful ways in which we can progress    |    |
| 64 | our understanding of the architecture underlying complex traits in trees. Here we outline some  |    |
| 65 | questions that can be used to guide future inquiry as the number of markers and sequence length |    |
| 66 | increase, and annotation becomes more precise and specific to tree biology.....                 | 79 |
| 67 | <b>Boxes</b> .....                                                                              | 80 |
| 68 | Box 1: A step in the right direction: Synergism between GWAS and Genomic Selection.....         | 80 |
| 69 | <b>SUPPLEMENTAL INFORMATION</b> .....                                                           | 81 |
| 70 | <b>Supplemental Figures</b> .....                                                               | 82 |
| 71 | Figure S1.....                                                                                  | 82 |
| 72 | Figure S2.....                                                                                  | 83 |
| 73 | Figure S3.....                                                                                  | 84 |
| 74 | Figure S4.....                                                                                  | 85 |
| 75 | Figure S5.....                                                                                  | 86 |
| 76 | <b>Supplemental Tables</b> .....                                                                | 87 |
| 77 | Table S1.....                                                                                   | 87 |
| 78 | Table S2.....                                                                                   | 88 |
| 79 | <b>BOXES</b> .....                                                                              | 89 |
| 80 | Supplemental Box S1.....                                                                        | 89 |
| 81 | Supplemental Box S2.....                                                                        | 90 |
| 82 | <b>Supplemental References</b> .....                                                            | 91 |

## 83 **Introduction**

84           Trees are plants with an arborescent habit, which is loosely defined as a tall-statured  
85 growth form usually producing wood (reviewed by Petit & Hampe 2006). Approximately 15% to  
86 25% of plant taxa are classified as trees (Oldfield et al. 1998; Grandtner 2005; Wortley &  
87 Scotland 2004), with forested ecosystems accounting for approximately 30% of terrestrial  
88 vegetation (Costanza et al. 1997) and providing habitat for terrestrial biodiversity. Indeed, trees  
89 play important ecological roles in diverse communities across the globe, such as vertical  
90 structural habitat, seeds for wildlife forage, forest cover, the production of oxygen, carbon  
91 sequestration, air and water filtration, as well as the reduction of erosion, protracting snowmelt,  
92 and desertification. Of these, biological roles are ultimately defined by a set of life history char-  
93 acteristics common to most tree species (Petit & Hampe 2006). These include predominantly  
94 outcrossing mating systems with high levels of gene flow and fecundities, as well as long  
95 lifespans and generation times (Loehle 1988; Mitton & Williams 2006; Savolainen et al. 2007),  
96 although these may differ in, for example, clades of tropical trees. As a result, tree species  
97 typically have large effective population sizes, moderate to high levels of genetic diversity, and  
98 frequent occurrences of locally adapted ecotypes (Savolainen et al. 2007; Alberto et al. 2013;  
99 Sork et al. 2013; Boshier et al. 2015; Prunier et al. 2015; Holliday et al. 2017). Across species,  
100 however, rates of morphological and molecular evolution tend to be slow (reviewed in De La  
101 Torre et al. 2017). Additionally, genome size varies enormously across species of trees, ranging  
102 from 0.4Gbp to 31Gbp (reviewed in Neale et al. 2017). Recent sequencing efforts in  
103 gymnosperms, which represent the largest tree genomes, reveal that much of genome size  
104 variation is due to transposable element dynamics and gene family evolution (Leitch & Leitch  
105 2012; Morse et al. 2009; Nystedt et al. 2013; Prunier et al. 2015; Neale et al. 2017) where  
106 duplication events of select gene families may contribute to the ability of trees to colonize  
107 marginalized habitats (Leitch & Leitch 2012; Prunier et al. 2015; Neale et al. 2017).

108           In trees, the general presence of large geographical ranges and extensive gene flow  
109 also provides an ideal setting to disentangle neutral from selective evolutionary processes  
110 (Neale & Kremer 2011). Indeed, their longevity and wide and heterogeneous geographical  
111 distributions lend trees suitable for addressing several key evolutionary questions about the  
112 importance of historical climatic fluctuations, and local adaptation involving shifts in allele  
113 frequencies (Lotterhos & Whitlock 2014; Savolainen et al. 2007, 2013; Platt et al. 2015). As we  
114 detail in subsequent sections, evidence consistent with local adaptation in trees is ubiquitous,  
115 even across fine spatial scales where it had been hypothesized that gene flow may overcome  
116 selection of locally favored alleles (e.g., Mitton et al. 1998; Budde et al. 2014; Csilléry et al.  
117 2014; Vizcaíno-Palomar et al. 2014; Eckert et al. 2015; Holliday et al. 2016; Roschanksi et al.  
118 2016; Lind et al. 2017).

119           Quantitative phenotypes are often used as a proxy for total lifetime fitness, which is com-  
120 posed of two broad components: survival and reproduction. Since most quantitative traits are  
121 related to some component of total lifetime fitness, they are often used to assess potential for  
122 local adaptation. For many plant taxa, selection pressures are expected to be strongest for vari-  
123 ation in survival during the juvenile stages of development (Donohue et al. 2010), particularly for  
124 those taxa with high reproductive output, as is the case for many tree species. As such, juvenile  
125 stages in plants have been found to contribute substantially to total lifetime fitness (Postma &  
126 Agren 2016). Phenotypic traits associated with juvenile survival have thus received the majority  
127 of genetic research focus in trees, particularly due to their long-lived nature. Such studies have  
128 led to intriguing insights gained through a long history of common garden experimentation  
129 (Langlet 1971; Morgenstern 1996). For example, traits such as growth (e.g., height and  
130 diameter), form (e.g., specific gravity, straightness), phenology (e.g., bud flush, bud set),  
131 juvenile performance (e.g., germination rate, seed traits) and physiology (e.g., cold hardiness,  
132 water-use efficiency) have all been shown to be under moderate to high genetic control  
133 (reviewed in Corn-elius 1994, Howe et al. 2003, Alberto et al. 2013; this review). Variation for

134 these traits is also often partitioned among populations (this review), despite the vast majority of  
135 neutral variation remaining within populations (Howe et al. 2003; Neale & Savolainen 2004).  
136 With few exceptions (e.g., major gene resistance in the white pine-blister rust pathosystem;  
137 Kinloch et al. 1970; Liu et al. 2017), variation for these traits forms a continuum across  
138 individuals, thus implying that the underlying genetic architecture is composed of a large  
139 number of small to moderate effect loci (i.e., a polygenic architecture; concept reviewed in  
140 Savolainen et al. 2007, 2013; Gagnaire & Gaggiotti 2016; Hoban et al. 2016; Timpson et al.  
141 2017). There is some uncertainty, however, concerning the properties of the effect size  
142 distributions comprising polygenic architectures (*sensu* Fisher 1930, Kimura 1983, and Orr  
143 1998), the relative importance of various forms of gene actions (e.g., dominance, epistasis) in  
144 producing trait variation (Crow 2010, Hansen 2013), how these interact to affect the evolution of  
145 polygenic architectures in natural populations (Hansen 2006), and how these factors will  
146 ultimately influence evolutionary processes and outcomes in forest trees (Savolainen et al.  
147 2007; Sork et al. 2013; Prunier et al. 2015). Considerable strides, made in the past through  
148 genotype-phenotype-environment studies (*sensu* Sork et al. 2013), have contributed intriguing  
149 insight into the genomic basis of local adaptation for tree species. However, given the large  
150 genome size of many tree species, such methods have been criticized as lacking in power and  
151 sufficient coverage needed to detect small effect loci, which is further exacerbated by rapid  
152 decay of linkage disequilibrium (LD) in most forest trees (Mackay 2009; Savolainen et al. 2007).  
153 Despite these limitations, association studies have been moderately successful in linking  
154 genotypes and phenotypes, including providing information for making inferences about local  
155 adaptation.

156 In this review, we set out to summarize theory related to polygenic local adaptation and,  
157 using these expectations, contextualize the progress of describing the genetic architectures  
158 underlying traits important to conservation and industry in undomesticated tree species. We first  
159 highlight the extensive evidence for local adaptation in trees by reviewing transplant designs

160 often used in investigations of quantitative genetic differentiation. Using an extensive literature  
161 survey across both gymnosperm and angiosperm species, we provide an overview of these  
162 transplant methods, give examples of each, and quantify the distribution of narrow sense herita-  
163 bility and  $Q_{ST}$  estimates across various trait categories. We further use this survey to establish  
164 patterns of comparative quantitative and neutral genetic differentiation (i.e.,  $Q_{ST}$ - $F_{ST}$  tests) which  
165 until this review had not been suitably synthesized in trees. Before we transition into discussing  
166 common methods used to uncover loci underlying adaptation, we establish expectations for the  
167 genetic architecture of polygenic, fitness-related traits by reviewing the theory available to date.  
168 We then provide an extensive review of genotype-phenotype associations in trees and provide  
169 the distribution of the percent phenotypic variance explained by empirically associated loci.  
170 Using this distribution, we underscore the limitations of using solely single-locus approaches to  
171 uncover the loci underlying local adaptation in tree species. Given this synthesis, we highlight  
172 exemplary genomic resources available to fill knowledge gaps, identify promising avenues of  
173 future research, identify key benchmarks and necessary steps towards truly integrating studies  
174 of trees into the genomic era, and address our primary question, “Are we out of the woods yet?”.

## 175 **Identifying heritable phenotypic variation**

176 Trees have evolved numerous adaptations as a result of their vast ecological breadth. As such,  
177 it has long been the goal of forest scientists to understand the traits important to viability and  
178 persistence. Among the most frequent designs used, common gardens and reciprocal  
179 transplants have aimed at describing genetically based differentiation of measured phenotypes  
180 among various source populations of varying sizes and across various geographic scales.  
181 Across these designs, investigators seek to better understand the phenotypes relevant to local  
182 adaptation and the selective pressures influencing these phenotypes. The exact design chosen,  
183 however, is generally based on the questions driving the research endeavor and often by the  
184 availability of resources (Morgenstern 1996; Blanquart et al. 2013; de Villemereuil et al. 2015).

185 In this section, we briefly review these designs, identify relevant questions and inferences,  
186 highlight some of the important practical applications of these techniques, and discuss  
187 examples of past investigations in various tree species.

188         There is a rich history of forest scientists using the common garden approach dating  
189 back hundreds of years (Langlet 1971; Mátyás 1996). In a broad sense, a common garden  
190 design is used to test for differentiation among genetically distinct groups in a homogeneous  
191 environment. These groups can be clonal replicates or sibships (families) derived from species  
192 or hybrids sampled from various populations, provenances, varieties, cultivars, or agricultural  
193 accessions (Cheplick 2015). When individuals from various origins are grown together under the  
194 same conditions, the observed phenotypic differentiation is expected to reflect underlying gen-  
195 etic variation, especially when maternal effects are assumed or shown to be absent. Common  
196 garden and provenance trial designs can also establish evidence that the phenotypes under  
197 study are heritable, a prerequisite for an adaptive response to selective agents (Supplemental  
198 Box S1), and that populations exhibit quantitative genetic differentiation (i.e.,  $Q_{ST}$ ; Spitz 1993).  
199 When driven by questions related to differentiation alone, a single common garden approach  
200 can be used to describe levels of quantitative genetic variation within and among genetically dis-  
201 tinct groups. In these cases, no environmental variables are manipulated, and thus, unequivocal  
202 evidence for trait divergence among groups, and the contributing factors influencing this diver-  
203 gence (e.g., neutral or selective processes), is often limited because conclusions must be based  
204 on *post hoc* inferences about source environments for the materials established in the common  
205 garden. Even so, single common garden approaches can be a powerful tool to demonstrate  
206 evidence congruent with local adaptation. For instance, the white carob tree (*Prosopis alba*  
207 Griseb., Leguminosae) growing in Argentina is an ideal multipurpose tree that has potential for  
208 use in reforestation and afforestation applications in the region. However, this genus is known to  
209 invade other regions, encroach on farmland and waterways, and has a thorny growth habit that  
210 can cause sepsis in livestock. To better understand how forestry applications can balance the



Lind *et al.*: Are we out of the woods yet?

211 benefits of production and forest protection, Bessega et al. (2015) used a single common  
212 garden representing eight provenances of *P. alba* to compare estimates of neutral genetic  
213 patterns to the quantitative genetic variation of life history traits related to economic importance.  
214 They found that for most traits there existed considerable underlying genetic variation ( $\overline{Q_{ST}} =$   
215 0.139). Additionally, source environments were often correlated with measured trait variation in  
216 the common garden, suggesting that the observed differentiation was driven by temperature,  
217 precipitation, wind speed, and sunshine fraction, with signals of divergent selection corroborated  
218 across  $Q_{ST}$ - $F_{ST}$  comparisons and tests for selection (e.g., S test, *sensu* Ovaskainen et al. 2011).  
219 Bessega et al. (2015) concluded that the signal of non-neutral differentiation was indicative of  
220 divergent phenotypic optima across populations, and that this variation could be used to direct  
221 future breeding programs across the region.

222         When there is evidence that environmental differences among source populations may  
223 be driving adaptive divergence, strong environmental candidates can be manipulated (artificially  
224 or via site selection) in a multiple common garden design to further investigate hypotheses of differ-  
225 entiation and adaptation. For instance, the sweet chestnut (*Castanea sativa* Mill., Fagaceae),  
226 also known for its edible fruit, is distributed across much of Minor Asia and southern Europe and  
227 is an ecologically important component of many Mediterranean systems. *Castanea sativa* exhibits  
228 ecological, physiological, morphological, and genetic variability as the range overlays a climatic  
229 transition from xeric Mediterranean conditions to wetter Euro-Siberian environments (see refs in  
230 Lauteri et al. 2004). Previous common garden experiments carried out by Lauteri and col-  
231 leagues have indicated that populations across this transition are further differentiated by water  
232 use efficiency (the ratio of plant carbon gain to water loss) and carbon isotope discrimination,  $\Delta$ .  
233 To further explore variability of drought-related traits, Lauteri et al. (2004) used an *ex situ*  
234 multiple common garden design using two water and temperature treatments in individual  
235 climatic chambers to assess differentiation among six populations across Spain, Italy, and

236 Greece. They found *treatment* and *population x treatment* effects were significant, suggesting  
237 variation in drought adaptation across populations. Additionally, populations originating from dry  
238 sites generally exhibited higher values of  $\Delta$ , which was also composed of significant additive  
239 genetic variation ( $h^2 = 0.15-0.52$ ), and suggests that genetic and physiological mechanisms of  
240 drought adaptation confer a capacity to colonize a wide arrange of environmental conditions,  
241 while strong negative relationships between  $\Delta$  and growth-related traits is suggestive of strong  
242 evolutionary constraints at juvenile stages.

243 While *ex situ* common gardens approaches (e.g., Lauteri et al. 2004) can provide strong  
244 evidence of adaptive divergence among populations, and in some cases corroborate putative  
245 drivers of observed differentiation, these studies can often exclude key environmental factors,  
246 possibly leading to confounding signals of adaptation (Kawecki & Ebert 2004). When *in situ*  
247 experimentation is feasible, site selection can be used to test for environmental drivers of local  
248 adaptation. For example, Evans et al. (2016) investigated traits related to growth and phenology  
249 in juvenile narrowleaf cottonwood (*Populus angustifolia* James, Salicaceae) by planting families  
250 from nine populations across the native range into three common gardens, one each at the  
251 northern, southern, and interior extent of the range. Using  $Q_{ST}-F_{ST}$  comparisons and clinal  
252 analyses alongside the quantitative genetic analyses, Evans et al. (2016) concluded that climate  
253 cues played a major role in structuring adaptive variation across the range of *P. angustifolia*,  
254 and that future industrial and conservation applications should utilize this information to inform  
255 source environments for optimal outcomes.

256 As both *in situ* and *ex situ* common garden trials can include multiple environmental  
257 influences in their design, reciprocally transplanting to all source environments is not necessarily  
258 a requirement to decompose genetic variation underlying adaptive traits or to provide evidence  
259 for, or the drivers of, differentiation among populations. Thus, these designs may preclude  
260 inferences regarding local adaptation *sensu stricto*. To produce such evidence, source

Lind *et al.*: Are we out of the woods yet?

261 populations can be planted in a (full- or incomplete-factorial) reciprocal transplant design and  
262 allow for traits related to fitness to be assessed across native and non-native environments. If a  
263 population is locally adapted, individuals exposed to their native environments should show  
264 increased growth, survival, and reproduction relative to non-native genotypes (Kawecki & Ebert  
265 2004; Leimu & Fischer 2008; Hereford 2009; Savolainen et al. 2013). For example, with the  
266 goal of delineating conservation units based on molecular and quantitative trait differentiation,  
267 Rodríguez-Quilón et al. (2016) used four reciprocally-transplanted common gardens to assess  
268 height and survival of samples from 35 natural populations of maritime pine (*Pinus pinaster*  
269 Aiton, Pinaceae). For both traits,  $Q_{ST}$  was consistently larger than  $F_{ST}$  across the four sites, a  
270 pattern suggestive of divergent selection. Six distinct gene pools based on evolutionary history  
271 of neutral markers were identified, and because high quantitative differentiation ( $Q_{ST}$ ) was found  
272 within these pools, hierarchical analyses were used to further identify ten adaptive population  
273 groups for use in conservation and breeding approaches.

274 Available evidence suggests that many populations of tree species have substantial  
275 heritable genetic variation, and that the quantitative traits under study often show signals of  
276 divergent selection across both broad and fine spatial scales. But how broadly can we apply this  
277 statement? Are there overall patterns of heritability and quantitative genetic structure across  
278 tree species? Because estimates of heritability and  $Q_{ST}$  are often only applicable to a specific  
279 set of populations, for a specific set of environments, at any specific point in time (e.g., see  
280 Figure 2D), a large sample of these estimates is therefore necessary to synthesize the current  
281 literature with regard to patterns across taxa. To accomplish this aim, we synthesized estimates  
282 from 129 published studies with estimates of narrow sense heritability ( $n = 114$ ) from replicated  
283 progeny trials and/or estimates of quantitative genetic differentiation ( $Q_{ST}$ ;  $n = 37$ ). However, we  
284 excluded papers that have been cited for estimates of  $Q_{ST}$  or heritability that were calculated  
285 *post hoc* from variance components (i.e., we only recorded estimates that were explicitly

286 reported as  $h^2$  or  $Q_{ST}$  in the original publication). For comparison, we further grouped measured  
287 traits into 14 broad categories: cold hardiness, disease resistance, drought hardiness, form,  
288 growth, herbivore and insect resistance, leaf and needle properties, phenology, plant secondary  
289 metabolites, reproduction, resource allocation, seed and early germination properties, survival,  
290 and wood properties. Because sample size can influence the precision of both heritability and  
291  $Q_{ST}$ , for each trait category we used a weighted average where weights were equal to the  
292 number of families used to estimate variance components for each estimate of  $h^2$  and  $Q_{ST}$ .

293 In agreement with Cornelius (1994), our survey found that many of the traits important to  
294 conservation and industry exhibit non-zero narrow sense heritability ( $\overline{h^2} = 0.367$ ; File S1;  
295 Figures S1-S4) and are thus amenable to selection. The mean weighted  $Q_{ST}$  across traits  
296 groups from our survey (Table S1; File S1) was between 0.10-0.28, except for drought  
297 hardiness (0.06) and disease resistance (0.04), with median values from the unweighted  
298 distribution generally falling below the weighted average for each trait group (Figure 1). This  
299 suggests that over various geographic and environmental distances, population histories, and  
300 species, there is a general pattern of substantial genetic variation underlying measured traits.  
301 Given our synthesis of  $Q_{ST}$  estimates in trees, we were curious of the evidence for adaptive  
302 divergence among populations ( $Q_{ST} > F_{ST}$ ). Of the 37 articles reporting  $Q_{ST}$  estimates in our  
303 review, 23 compared  $Q_{ST}$  with  $F_{ST}$  or  $G_{ST}$  estimated from the same populations under study  
304 (however, we excluded studies that used  $F_{ST}$  measurements taken from the literature, e.g., as in  
305 McKay & Latta 2002; Alberto et al. 2013). Indeed, as pointed out by Crnokrak & Merilä (2002),  
306 comparisons of  $Q_{ST}$  and  $F_{ST}$  estimated from different populations and/or at different time points  
307 are uninformative. Of these 23 studies, 18 compared  $Q_{ST}$  and  $F_{ST}$  in a statistical framework  
308 while the remaining five studies compared  $Q_{ST}$  and  $F_{ST}$  numerically. Across numerical and  
309 statistical comparisons combined, 67% (254 of 381 traits) exhibited higher  $Q_{ST}$  than  $F_{ST}$ , with  
310 69% (170 of 246 traits) exhibiting significantly higher  $Q_{ST}$  than  $F_{ST}$ . Although we did not tally

311 instances where  $Q_{ST}$  was reported to be less than  $F_{ST}$  (statistically or otherwise), as this was not  
312 the focus of our review, there were some instances in which this was the case. For instance,  
313 Lamy et al. (2011) found such patterns when quantifying population genetic differentiation of  
314 cavitation resistance across the species range of maritime pine (*Pinus pinaster* Aiton,  
315 Pinaceae), while Mahalovich et al. (2011) also found that  $Q_{ST} < F_{ST}$  for traits related to white  
316 pine-blister rust resistance in inoculated seedlings of whitebark pine (*Pinus albicaulis* Engelm.,  
317 Pinaceae). While various explanations for such patterns were outlined by Lamy et al. (2011),  
318 canalization was argued as the most likely process driving the observed patterns, while  
319 Mahalovich et al. (2011) offered similar arguments for selection favoring the same genotype in  
320 different environments (see Lamy et al. 2012 for more regarding this aspect).

321 Despite neutral genetic differentiation partitioned primarily within populations, adaptive  
322 genetic variation seems to be structured to a greater degree across populations, more often  
323 than not, for the various fitness-related traits reviewed here. Such a pattern is indeed consistent  
324 with local adaptation, assuming that (among other considerations such as the recency of  
325 selection) mutation rates are considerably lower than migration rates in these populations  
326 (Whitlock 1999; Hendry 2002; Leinonen et al. 2013). In any case, given an extensive literature  
327 supporting the local adaptation hypothesis in trees, our results appear consistent with patterns  
328 of selective forces acting on abundant, heritable genetic variation across populations, even in  
329 the face of gene flow (discussed further in the next section).

### 330 **Expectations for the loci underlying quantitative traits**

331 The homogenous environments of the common garden and reciprocal transplant  
332 designs are ideally suited to test hypotheses of local adaptation in trees (Sork et al. 2013).  
333 However, uncovering the genetic basis and contributory influence of specific loci underlying  
334 these adaptive traits is a sizable endeavor on its own, and the success of such pursuits will be  
335 determined, in part, by the trait's underlying genetic architecture (i.e., the number, effect size,

336 type, location, expression, pleiotropic effect, environmental influence, and interaction of under-  
337 lying loci), which is generally not known *a priori* (Stinchcombe & Hoekstra 2008; Rellstab et al.  
338 2015; Savolainen et al. 2013; Hoban et al. 2016; Burghardt et al. 2017; Wadgyamar et al. 2017).  
339 Much of our early understanding of the architectures of complex traits came shortly after  
340 Nilsson-Ehle (1909) and East (1910) independently demonstrated evidence for multiple-factor  
341 inheritance, where Fisher (1918) laid the groundwork for quantitative genetics by incorporating  
342 the additive properties of variance to partition phenotypic variation into components tractable to  
343 a model of Mendelian inheritance. It was this work, and that of Fisher's geometric model (1930),  
344 which founded the basis for attributing continuous variation of phenotypes to a polygenic model  
345 of many underlying heritable components of mainly small effect. From this model, Fisher (1930)  
346 concluded that mutations of small effect were the main drivers of adaptation, suggesting large-  
347 effect substitutions to contribute little to adaptation due to negative pleiotropic effects  
348 constraining effect size. Therefore, the fate of a given locus would be conditioned on its  
349 average, marginal effect on fitness calculated across the species, with non-additive deviations  
350 from this linear model of inconsequential influence. This micro-mutationist view, to a large  
351 extent, remained the dominant thought for nearly half a century (Orr 2005). It was then that  
352 Kimura (1983) established that for an allele to contribute to adaptation, it would need to survive  
353 the stochastic nature of drift. Thus, new mutations of low frequency and effect were less likely to  
354 contribute substantially to adaptive evolution. Considering the adaptive contribution probability  
355 of large and small effect loci, Kimura concluded that mutations of moderate effect would be the  
356 most plausible. Years later, Orr (1998) showed that over the entire bout of selection via an  
357 adaptive walk, the distribution of fixed substitutions resembles an exponential distribution, with  
358 effect size decreasing with the proximity to the phenotypic optimum. In addition, the distribution  
359 of fitness effects of beneficial mutations is also expected to be exponential (Orr 2003; for more  
360 discussion on this aspect, see also Orr 2006; Eyre-Walker & Keightley 2007; Martin &  
361 Lenormand 2008, Kopp & Hermisson 2009b; Keightley & Eyre-Walker 2010, Dittmar et al. 2016).

362 Despite major advances in theory and technology, there still remains substantial uncertainty  
363 regarding the exact number of loci underlying many adaptive traits, the effect size distribution of  
364 these loci, and how the number of underlying loci and effect distribution may change under  
365 various evolutionary regimes (Orr 2001; Slate 2005; Hansen 2006; Mackay et al. 2009). In this  
366 section, we describe how various factors can contribute to the (perhaps, effective) number of  
367 causative loci, and the distribution of effects underlying continuously distributed adaptive traits,  
368 beginning first with aspects of the architecture itself (gene action), and concluding with  
369 explanations of how various processes (e.g., selection) play an influential role in the evolution of  
370 underlying genetic architectures. Establishing these expectations is essential for assessing  
371 common approaches and guiding future directions. In the next section we then compare these  
372 expectations with methods used in, and results from, genotype-phenotype associations in trees.  
373 While we discuss these examples in isolation, we highlight the fact that the underlying biological  
374 processes are often not independent.

### 375 ***Gene action***

376 The classical genotype-phenotype map is largely one of additive effects, and is  
377 represented by a statistical regression of the phenotype on genetic content, as developed by  
378 Fisher (1918) and extended by others (e.g., Cockerham 1954; Kempthorne 1954). Indeed,  
379 much of the work done in trees has relied on such additive effects to describe heritable and  
380 quantitative genetic variation (see previous section). In this model, the phenotypic variance is  
381 partitioned into orthogonal (i.e., independent) contributions from the genetic variance ( $\sigma_G$ ),  
382 environmental variance ( $\sigma_E$ ), and the variance due to interaction between genotype and  
383 environment ( $\sigma_{G \times E}$ ; Figure 2; see Supplemental Box S1). Further,  $\sigma_G$  is also the sum of  
384 orthogonal variance components, each term representing a different form of gene action. The  
385 additive, dominance, and epistatic terms respectfully designate the associated variance  
386 contribution of independent alleles, the non-additive contribution to variance of interactions

Lind *et al.*: Are we out of the woods yet?

387 among alleles at the same locus, and the contribution to variance of non-additive interactions  
388 among alleles at different loci (the latter of which can take one of many forms such as additive-  
389 by-additive, additive-by-dominance, etc.; Lynch & Walsh 1998). As a result, non-additive gene  
390 action is minimized as non-linear contributions to the overall phenotype (Moreno 1994; Whitlock  
391 *et al.* 1995) which contributes little to the distinction of the different forms of dominance and  
392 epistasis (Cheverud & Routman 1995; Hansen & Wagner 2001; Hermisson *et al.* 2003; Hansen  
393 2006; Mackay 2014) nor towards the inference of aspects of the underlying genetic architecture  
394 in general (Nelson *et al.* 2013; Huang & Mackay 2016).

395         These statistical conveniences afforded by Fisher and others led to the notion that such  
396 non-additive effects were transient (i.e., are due to LD, which will decay with the relaxation of  
397 selection), or that trends of statistical epistasis were representative of functional epistasis in  
398 general, and therefore epistasis was unimportant to evolutionary dynamics (e.g., Bulmer 1980;  
399 Crow 2008, 2010; Hill *et al.* 2008). While minimized in a statistical regression, this does not  
400 necessarily mean that epistasis and dominance will not have a profound impact on the genetic  
401 architecture, or towards a given population or species' long-term evolutionary trajectory, even if  
402 statistical epistatic or dominance variance is minimal (Goodnight 1988; Chevrud & Routman  
403 1995; Hansen & Wagner 2001; Hansen 2013; Nelson *et al.* 2013; Griswold 2015; Paixão &  
404 Barton 2016). Indeed, parameterizing a model in which the type I sums of squares is  
405 determined by non-additive parameters, as opposed to additive variance in the conventional  
406 regression model, the majority of genetic variation is still captured by the primary effect in the  
407 model regardless of the underlying architecture (Huang & Mackay 2016). Given the prevalence  
408 of evidence for non-additive contributions (e.g., Phillips 2008; de Visser *et al.* 2011; see also  
409 references in Hansen 2013), it is likely that non-additive effects will play a role in evolutionary  
410 outcomes. For instance, Huber *et al.* (2017) showed that the degree of dominance in  
411 *Arabidopsis* is an outcome based upon functional importance and optimal expression level.  
412 Further, Carter *et al.* (2005) show that, relative to a purely additive trait (or with non-directional



Lind *et al.*: Are we out of the woods yet?

413 epistasis) under directional selection, positive and negative epistasis can respectfully increase  
414 or decrease the additive genetic variance, and thus increase or decrease the rate of phenotypic  
415 response to selection (see also Le Rouzic & Álvarez-Castro 2016). As Jones et al. (2014) show,  
416 for a two-trait phenotype controlled by pleiotropic and epistatic effects, epistasis in the presence  
417 of selection can also affect the mutational architecture of complex traits, where the average  
418 allelic effect evolves to be negatively correlated with the average epistatic coefficient, the  
419 strength of which is greater in larger population sizes. Yet, as described by Barton et al. (2016),  
420 and further discussed by Barton (2017) and Paixão & Barton (2016), the infinitesimal model can  
421 be generalized to include epistatic effects, particularly when the number of underlying loci is  
422 large and selection on individual loci is weak. In the case of non-systematic, weak pairwise  
423 epistasis, and without mutation or environmental noise, the infinitesimal model holds to a good  
424 approximation (Barton et al. 2016). In the case of sparse epistasis with selection and a large  
425 number of loci, the change in the trait mean over 100 generations is greater than that under a  
426 purely additive architecture, and the decrease in additive genetic variance exceeds, to an  
427 extent, that of the neutral case after about 30 generations (which is exacerbated with simpler  
428 architectures), with a reduction of the frequency of segregating alleles with positive effect on the  
429 trait (Barton et al. 2016; Barton 2017).

430         Despite an ongoing debate within the literature (Wright 1932; Whitlock 1995; Crow 2008,  
431 2010; Gibson 2012; Zuk et al. 2012; Hansen 2013; Hemani et al. 2013; Nelson et al. 2013;  
432 Mäki-Tanila & Hill 2014; Ávila et al. 2014; Paixão & Barton 2016), and given that there seems to  
433 be no general prevalence of either positive or negative epistatic interactions (Mackay 2014), the  
434 infinitesimal model is likely to continue to contribute to our understanding of the evolution of  
435 complex traits, as exemplified in its application towards breeding applications (Turelli & Barton  
436 1994) and specifically those successfully applied to trees (Savolainen et al. 2007;  
437 Thavamanikumar et al. 2013; Isik et al. 2015; Grattapaglia 2017). Ultimately, the success of  
438 such models will be conditioned on the context, as well as the distinction between physiological

Lind *et al.*: Are we out of the woods yet?

439 and statistical gene action. Here, (higher order) non-additive contributions to phenotypic  
440 variance will likely have minimal deviations from the limit of the infinitesimal model in the short-  
441 term, particularly if this is primarily due to independent, low-order interactions, and should thus  
442 be applied with this in mind. As such, while short-term evolutionary processes are likely to hold  
443 in this limit, identifying the non-additive loci which underlie the trait, and their respective gene  
444 action, may still need further inquiry (Grattapaglia 2017). Indeed, it is often argued that non-  
445 additive gene action is too often neglected in studies of complex traits (e.g., Carlborg & Haley  
446 2004), possibly due to the large sample sizes required to detect significant interactions, and lack  
447 of statistical power incurred due to multiple hypothesis testing (Mackay 2014). Given the recent  
448 reduced cost of sequencing technology and availability of novel computational and laboratory  
449 tools, future studies incorporating investigations of epistasis and dominance (where appropriate  
450 and feasible) would contribute to our understanding of genetic architectures, quantitative trait  
451 evolution, and breeding applications in trees (Vitezica et al. 2017). For example, breeding  
452 applications assessing hybridization across divergent backgrounds, as is also prevalent across  
453 species in nature, have shown the importance of non-additive effects in phenotypic outcomes  
454 (as in *Eucalyptus*, e.g., Tan et al. 2017, and *Pinus*, e.g., Dungey 2001). Even so, the additive  
455 model is still a powerful tool to describe the loci underlying adaptive traits.

456 Pleiotropy is another considerable factor influencing the expectations of the genetic  
457 architecture of quantitative traits, its evolution or evolvability, and indeed the genotype-pheno-  
458 type map (Hansen 2003; Orr 2006; Chevin et al. 2010b; Tenallion 2014). While multiple defin-  
459 itions exist across the literature (see Paaby & Rockman 2013), pleiotropy is generally identified  
460 as a single locus influencing multiple phenotypic traits. Other than linkage disequilibrium,  
461 pleiotropy is the fundamental cause of genetic covariance among phenotypes (Lande 1980).  
462 Given that the number of independent traits under selection is likely limited (Barton 1990),  
463 pleiotropy likely plays a substantial role in evolutionary dynamics. It is expected that as the  
464 number of traits,  $n$ , influenced by a locus increases, the probability of a beneficial mutation will

Lind *et al.*: Are we out of the woods yet?

465 decrease with the effect size of a mutation; where the effect size,  $r$ , relative to the distance to  
466 the phenotypic optimum,  $d \cdot n^{-1/2}$ , must be (much) less than  $d$  in order to be beneficial (Fisher  
467 1930; the so-called 'cost of complexity': Orr 2000). Yet, empirical data seem to contradict this  
468 hypothetical cost, as the effect size of mutations often do not scale with pleiotropy in this way,  
469 and instead increase with the dimensionality of targeted traits (Wagner et al. 2008; Wang et al.  
470 2010). Additionally, universal pleiotropy, where all mutations affect all phenotypes, and where  
471 there is no net directionality of mutations (i.e., mutational isotropy; both aspects as in Fisher  
472 1930), has also been challenged by findings which suggest that only a fraction of phenotypic  
473 traits are affected by pleiotropic loci (Wagner et al. 2008; Wang et al. 2010). Relaxation of such  
474 assumptions from Fisher's geometric model have shown that the total number of traits affected  
475 by pleiotropy has a relatively decreased effect on the rate of evolution in more general models  
476 (e.g., Martin & Lenormand 2006; see also Simons et al. 2017, and references in Wagner &  
477 Zhang 2011 and Tenailon 2014). It seems that if model organisms (e.g., Pickrell et al. 2016,  
478 Smith 2016) are taken as a bellwether for expectations in trees, pleiotropy is likely a contributing  
479 factor for many quantitative traits. Thus, the fraction of beneficial mutations is likely limited when  
480 the number of traits influenced is large, suggesting that the cost of complexity (or, more  
481 precisely, pleiotropy) may be generally robust (Welch & Waxman 2003), particularly when a  
482 population is close to its phenotypic optimum where selection acts against dimensionality of  
483 pleiotropic effects (Zhang 2012). Thus, the degrees of pleiotropy across underlying loci,  
484 distance from phenotypic optima, and covariance among traits under selection can have  
485 profound effects on evolutionary outcomes (e.g., as in *Pinus contorta*, Lotterhos et al. 2017).  
486 This is particularly true for the evolvability of architectures and distribution of effect sizes, which  
487 further depends on the variational autonomy of the traits affected by pleiotropy and the  
488 modularity of mutations, the former of which is ultimately determined by the direction and size of  
489 effect among a set of pleiotropic loci across a set of characters (see Arnold 1992; Wagner &  
490 Altenberg 1996; Hansen 2003, 2006; Wagner et al. 2007; Chevin et al. 2010b; Wagner & Zhang

491 2011; MacPherson et al. 2015).

492 In many investigations of local adaptation, the primary interest is in trait evolution and  
493 thus the underlying genetic components. As such, environmental effects and interactions are  
494 not often pursued, or perhaps even detected (Yoder & Tiffin 2017), particularly in studies of a  
495 single common garden or environment, and are instead treated in much the same way as  
496 epistatic interactions discussed above. Nonetheless, genotypic effects can evolve through  
497 genotype-by-environment interactions with a changing environment just as is the case for the  
498 evolution of non-additive interactions with a changing genetic background (Hansen 2006).  
499 Indeed, it is likely that consistent fluctuations in the environment would select for  
500 environmentally-perceptive responses, which seems to be the case across many tree species  
501 (Li et al. 2017). The contribution to the effect size distribution from GxE interactions will be a  
502 function of the variation in selection across the environments experienced by the interacting  
503 allele(s) as well as the level of gene flow between environments and fitness differences among  
504 various genetic backgrounds, but to our knowledge such information (to the extent of that for  
505 e.g., selective sweeps) is lacking within the literature.

### 506 *Negative selection*

507 Negative selection acts against deleterious mutations that arise within populations. It is  
508 one, but not the only, mechanism that underlies stabilizing selection, defined at the level of the  
509 phenotype where deviations from an optimal value are selected against. Optima in this  
510 framework can be thought of either globally (i.e., across all individuals) or locally (i.e., individuals  
511 within a population), where the latter can have varying optima across populations. The nature of  
512 the optima (i.e., being local or global) affects the detectable trait architecture. For example, trait  
513 architecture should be composed of rare alleles with a negative relationship between effect size  
514 and allele frequency (cf. Eyre-Walker 2010 and references therein), where this relationship can  
515 also be confounded with degree of dominance and gene expression network connectivity

Lind *et al.*: Are we out of the woods yet?

516 (Huber *et al.* 2017), under models of a single global optimum. From a population genetic  
517 perspective, the ubiquity of negative selection is encapsulated in the name background  
518 selection, which has extensive reviews about its presence in natural systems (Charlesworth  
519 2013), its importance for the neutral and nearly neutral theories of molecular evolution (Ohta  
520 1992, 1996), and its contribution to observable patterns of hitchhiking (Stephan 2010). Important  
521 for the study of polygenic adaptation and its architecture, however, is that loci identified using  
522 GWAS may also include segregating deleterious variation (as argued and hinted at in Eckert *et al.*  
523 2013b; cf. Yang *et al.* 2017; Gazal *et al.* 2017) as this creates trait variance, with little known  
524 about their prevalence (including differential prevalence across traits), differentiation in  
525 frequencies across populations (but see Zhang *et al.* 2016), and effects on downstream  
526 inferences about divergent selection pressures across populations. It is sets of GWAS loci,  
527 though, that are currently analyzed for signatures of local adaptation via spatially divergent (i.e.,  
528 locally positive) natural selection (e.g., Berg & Coop 2014).

529         Recent exemplary work with expression networks in *Populus tremula* L. (Salicaceae;  
530 Mähler *et al.* 2017) and the herbaceous *Capsella grandiflora* Boiss. (Brassicaceae; Josephs *et al.*  
531 2015, 2017a) have revealed intriguing insight into the effects of negative selection on the  
532 architecture of complex traits in plants, as well as the relationship between network connectivity  
533 and the strength of negative selection. In *P. tremula*, genes with expression levels that were  
534 significantly associated with sequence variation were found more often in the periphery of the  
535 co-expression network (lower network connectivity) than within network module hubs (higher  
536 connectivity), while expression-associated SNPs were negatively correlated with network  
537 connectivity and effect size, a pattern also found between connectivity and expression variance,  
538 and minor allele frequency and QTL effect size (Mähler *et al.* 2017). Genes associated with  
539 sequence variation had less skewed site-frequency spectra (i.e., the frequency distribution of  
540 allelic variants) and lower estimates of nonsynonymous to synonymous divergence ( $d_N/d_S$ ) than  
541 genes not associated with sequence variation, together suggesting that genes within the

542 periphery of co-expression networks are likely under less selective constraint than those genes  
543 with high network connectivity which likely experience greater intensities of purifying selection.  
544 These genes thus tend to have more segregating variation and may be those most likely to be  
545 detected with current sample sizes utilized in GWAS, which has implications for estimation of  
546 trait architecture and its 'degree' of polygenicity. Even so, while there is prevalent evidence of  
547 negative selection in trees (e.g., Krutovsky & Neale 2005, Palmé et al. 2009, Eckert et al.  
548 2013a,b; De La Torre et al. 2017), more inquiry is needed.

### 549 ***Positive selection***

550         The temporal and spatial heterogeneity of selection can impact the evolution of genetic  
551 architectures underlying adaptation. These impacts are often thought of on a spectrum of trade-  
552 offs, with one end being antagonistic pleiotropy where allelic effects vary between positive and  
553 negative on fitness across populations, and the other being conditional neutrality where allelic  
554 effects on fitness are positive in one or more populations and nearly zero in others (Anderson et  
555 al. 2012, Savolainen et al. 2013). For instance, alleles incorporated into a population after a shift  
556 in environmental influence can increase from low to high frequency via positive selection. The  
557 existence of such a beneficial allele can manifest in several ways: from new mutations,  
558 introgression through gene flow, or molecular reorganization through novel recombination,  
559 inversion, transposition, copy number variation, or insertion-deletion events. If there is strong  
560 selection acting on this allele ( $N_e s \gg 1$ ), it will sweep to high frequency creating a signature of  
561 reduced polymorphism at neutral sites physically linked to the allele ('genetic hitchhiking',  
562 Maynard Smith & Haigh 1974) resulting in a hard 'selective sweep' (Berry et al. 1991). However,  
563 in structured populations with limited gene flow, this process can take significantly longer to  
564 reach fixation, resulting in incomplete sweeps (Whitlock 2003). Additionally, Pavlidis et al.  
565 (2012) found that, in congruence with Chevin & Hospital (2008), a multilocus genotype often  
566 prevents the trajectories of individual alleles from sweeping to fixation, with an increasing

Lind *et al.*: Are we out of the woods yet?

567 number of loci leading to decreasing probability of fixation, and as a result, an altered selective  
568 signature at such loci (see also Jain & Stephan 2017). As such, hard selective sweeps in a  
569 polygenic architecture are expected to be rare (but not completely absent) under most  
570 circumstances, particularly when the shift in environment causes a relatively small deviation  
571 from the phenotypic optimum. Thus, hard sweeps most likely apply to loci with relatively large  
572 effect above a calculated, context-dependent threshold value (Orr 2005; de Vladar & Barton  
573 2014; Stephan 2015; see specifically Jain & Stephan 2015, 2017).

574 While early literature (Maynard Smith & Haigh 1974; Kaplan et al. 1989) focused on the  
575 rapid sweep of an allele incorporated into a population after an environmental shift, research  
576 within the last few decades have focused on ‘soft sweeps’ resulting from neutral or deleterious  
577 mutations that are present in the standing genetic variation prior to the change in the selective  
578 environment, wherein the selection coefficient changes with the environmental shift such that  
579 the allele(s) become evolutionarily advantageous (reviewed in Hermisson & Pennings 2005,  
580 Barret & Schluter 2008, Messer & Petrov 2013, and Hermisson & Pennings 2017; see also  
581 Jensen 2014). These allele(s) could manifest via a single low-frequency variant, multiple  
582 variants caused by parallel recurrent mutation/reorganization on multiple haplotypes, or multiple  
583 unique alleles that arise independently within, perhaps multiple, populations. In such cases  
584 where selection acts via soft sweeps, the rate of evolution at the phenotypic level is expected to  
585 exceed those of hard sweeps because the alleles under selection have escaped the stochastic  
586 nature of drift to a greater degree and are segregating within multiple individuals and genetic  
587 backgrounds within the population. The extent to which soft sweeps alter the effect size  
588 distributions underlying the genetic architecture is likely dependent upon both the strength of  
589 selection and effect size before and after the environmental change (Messer & Petrov 2013;  
590 Matuszewski et al. 2015; Jain & Stephan 2017), while the frequency before selection influences  
591 the likelihood of subsequent detection (Innan & Kim 2004). Additionally, if multiple mutations are  
592 segregating during the sweep, the probability of fixation for any given locus also decreases

593 (Pennings & Hermisson 2006a, 2006b; Chevin & Hospital 2008; Ralph & Coop 2010). Evidence  
594 for hard sweeps in tree species exist within the literature, although they are rare (e.g., disease  
595 response genes in *Pinus taeda* Ersoz et al. 2010; see also Table 2 in Siol et al. 2010). However,  
596 for many species of trees, which often experience high gene flow and strong diversifying  
597 selection across populations, adaptive divergence for polygenic traits is expected to result more  
598 often from soft sweeps than hard sweeps, affecting phenotypes by subtle allele frequency  
599 changes across populations, such that allele frequency differences of individual loci across  
600 populations for neutral and selective sites will often be nearly indistinguishable (Latta 1998,  
601 2003; Barton 1999; Le Corre & Kremer 2012; Stephan 2015; Yeaman 2015; Jain & Stephan  
602 2015, 2017). Indeed, the large effective population sizes found in most tree species would  
603 permit large effective mutation rates (or reorganization events) necessary for a soft selective  
604 sweep from multiple unique variants, particularly when the phenotype is underlain by a large  
605 mutational target. Even so, and as highlighted by Stephan (2015) and Bailey & Bataillon (2016),  
606 the extent to which scientists can detect the influence of demographic processes on soft versus  
607 hard sweeps, and vice versa, remains challenging (Jensen et al. 2005; Chevin & Hospital 2008;  
608 Schrider et al. 2015, 2016; Schrider & Kern 2016; Hermisson & Pennings 2017).

609         While discrete directional selection events are likely to be a common evolutionary  
610 influence across taxa, fluctuating or sustained directional selection (i.e., moving optima) are also  
611 likely to be contributory factors influencing the genetic architecture of quantitative traits  
612 (reviewed in Kopp & Matuszewski 2013; see also McCandlish & Stoltzfus 2014). For a  
613 sustained moving optimum, the effect size distribution of beneficial alleles is expected to be  
614 dependent upon the effect distribution of standing or *de novo* mutations as well as the strength  
615 of selection: if the rate of change is dramatic, adaptation from new mutations is expected to  
616 occur through intermediate to large-effect loci (Kopp & Hermisson 2009a; Matuszewski et al.  
617 2014) or from small-effect loci when adaptation occurs via standing variation (particularly when  
618 epistasis is considered, Matuszewski et al. 2015). Under lesser rates of environmental change,



619 adaptation is expected to proceed through mainly alleles of small-effect (Collins et al. 2007;  
620 Kopp & Hermisson 2009a, 2009b) where intermediate effects will dominate the long-term  
621 distribution of effect sizes (Kopp & Hermisson 2009b). In the case of fluctuating environments,  
622 outcomes often depend directly on the degree of temporal autocorrelation of the changing  
623 environment. In such cases of stochastic fluctuation around a linear trend of environmental  
624 change, extinction risk increases relative to that of the strictly linear trend (Bürger & Lynch 1995)  
625 where local adaptation lags, to some degree, behind any given contemporaneous scenario. In  
626 comparison, and similar in some ways, stochastic fluctuations around a constant mean are  
627 expected to resemble the dramatic environmental change scenario described above,  
628 characterized by strong selection pressures, maladaptation between generations, and a large  
629 lag load (Bürger 1999; Chevin 2012; Kopp & Matuszewski 2013). In the case of autocorrelated  
630 shifts, the 'predictability' of such fluctuations may decrease the possibility of extinction, increase  
631 probability of local adaptation, and lead to similar scenarios as discussed for gradual changes in  
632 the environment (Kopp & Matuszewski 2013).

### 633 ***Gene flow***

634 Gene flow, to the extent that would be appreciable to that found in trees (reviewed in  
635 Savolainen et al. 2007), is also an important component shaping quantitative expectations.  
636 Indeed, since the early 1900s we have known that gene flow can disrupt adaptation if selection  
637 is not strong enough to overcome the loss of beneficial alleles (Haldane 1930; Wright 1931; Slatkin  
638 1987; reviewed in Felsenstein 1976, Lenormand 2002, Savolainen et al. 2007, 2013, Feder et  
639 al. 2012a, and Tigano & Friesen 2016). Particularly when gene flow is asymmetric between core  
640 and peripheral populations, adaptation can be inhibited in marginal habitats (Kirkpatrick &  
641 Barton 1997; Kawecki 2008). Even so, there is abundant evidence that gene flow can promote  
642 adaptation and maintain polymorphisms within populations, including white sand lizards  
643 (Laurent et al. 2016), stick insects (Comeault et al. 2014, 2015), cichlid fishes (Meier et al.

644 2017), Darwin's finches (Lamichhaney et al. 2015), and lodgepole pine (Yeaman & Jarvis 2006).

645         The magnitude of gene flow between populations can also impact the distribution of  
646 effect sizes, for when gene flow falls below a critical threshold, and over many thousands of  
647 generations, there is an increase in the probability of establishment and persistence times of  
648 large-effect alleles, thus reducing the proportion of the polymorphism due to small-effect loci  
649 (Yeaman and Otto 2011; Yeaman and Whitlock 2011). These dynamics are further influenced  
650 by the susceptibility of alleles to 'swamping' (Slatkin 1975; Bürger & Akerman 2011; Lenormand  
651 2002; Yeaman 2015; *sensu* Haldane 1930). For alleles that are prone to swamping, adaptive  
652 phenotypic divergence depends on genetic variation and is driven by allelic covariance among  
653 populations particularly when the underlying architecture is highly polygenic, the mutation rate is  
654 high, and the number of loci underlying the trait exceeds the number needed to achieve the  
655 local optimum phenotype (genetic redundancy; Yeaman 2015). Conversely, when there is little  
656 genetic redundancy underlying the trait, limited divergence is observed unless the effect size of  
657 a given swamping-prone allele exceeds the critical migration threshold. In these cases where  
658 swamping-prone alleles contribute to adaptive divergence, the genetic architecture is transient  
659 and any given locus contributes ephemerally to phenotypic divergence, even for loci of relatively  
660 large effect (Yeaman 2015). In the case of swamping-resistant alleles, the evolved architecture  
661 is enriched for large-effect loci and adaptive divergence can be maintained with little genetic  
662 variation or input from mutation. Yet while the contribution from such loci can last many  
663 thousands of generations, the architecture can again become transient as the genetic  
664 redundancy or mutation rate increases (Yeaman and Whitlock 2011; Yeaman 2015).

665         Physical linkage and reduction of recombination between adaptive loci can also play a  
666 considerable role in adaptive processes in the face of gene flow (Feder & Nosil 2010; Feder et  
667 al. 2012a,b; Yeaman 2013; references therein). In such cases, loci that are tightly linked to other  
668 loci already under selection will have an increased probability of contributing to local adaptation,  
669 both because of physical linkage as well as by reducing the effective recombination among loci

670 within the sequence block. For instance, Yeaman & Whitlock (2011) showed that under  
671 divergent selection with gene flow, the number of contributing loci decreases with increasing  
672 recombination while small effect loci tend to cluster in groups that act as a single large effect  
673 locus (see also Remington 2015), and strong selection can maintain these clusters of linked loci  
674 over greater map distances than can weak selection. More recently, Yeaman (2013) employed  
675 individual-based simulations to provide evidence that the clustering of alleles throughout a bout  
676 of adaptation is unlikely to be driven mainly by divergence hitchhiking alone, and that instead  
677 competition between genetic architectures and chromosomal rearrangements occurring  
678 throughout adaptive processes under a range of environmental fluctuation scenarios can lead to  
679 the evolution of tightly clustered adaptive loci which persist in the event of gene flow, unlike the  
680 clusters identified by Yeaman & Whitlock (2011). Yeaman (2013) found that the level of  
681 clustering was a function of the temporal fluctuation period, the rate of rearrangement itself is an  
682 important determinant on the evolution of clustered architectures, and clusters can in some  
683 cases be evolutionarily disadvantageous. Together, these results suggest that genomic  
684 rearrangements (reviewed in Ortiz-Barrientos et al. 2016), including inversions (Kirkpatrick &  
685 Barton 2006; reviewed in Hoffman & Rieseberg 2008), which decrease the effective rates of  
686 gene flow among adaptive sequences can be an essential component of local adaptation, and  
687 indeed some cases of speciation, in the face of gene flow.

## 688 ***Summary***

689 While we provided an overview of the factors that can influence the genetic architecture  
690 of local adaptation, we acknowledge that it is far from exhaustive. Because the phenotypes  
691 used in studies of local adaptation (particularly those assumed or corroborated to be a compo-  
692 nent of total lifetime fitness) often have a continuous distribution, and are thus quantitative in  
693 nature, the underlying genetic basis for these traits is likely polygenic and is predicted to be  
694 underlain by multiple (often many) segregating loci, many of which may confer small phenotypic

695 effects (and are thus unlikely to be detected using single-locus approaches). Even so, a contin-  
696 uum exists, where the true genetic architecture (the number of contributing loci, as well as their  
697 relative locations within the genome, phenotypic effects, and interactions) underlying a given  
698 complex trait is itself determined by a combination of evolutionary forces that encompass an  
699 interplay between the strength, timing, and direction of (background) selection against the  
700 homogenizing effects of gene flow and recombination, disruptive effects of drift, linkage, trans-  
701 position, inversion, and mutation, interactions between underlying loci as well as between these  
702 loci and the environment, structural variation, relationship to gene expression networks, as well  
703 as other factors related to life history. Consequently, the contemporary genetic architecture is a  
704 result of past evolutionary processes, while the adaptive response to future evolutionary  
705 dynamics is influenced in part by the contemporary architecture and genetic variance at hand.

## 706 **The genomics of local adaptation in trees**

### 707 *Common approaches used to identify adaptive loci*

708 Across taxa, and specifically in trees, the predominant association and outlier methods  
709 for uncovering sets of loci underlying local adaptation have relied upon single-locus population  
710 genetic approaches. Putatively adaptive loci are often identified by elevated allele frequency  
711 differences among populations relative to patterns genome-wide. Yet, as revealed in the  
712 previous section, loci underlying polygenic traits will often be indistinguishable from non-  
713 causative sites in this way. Further, outlier tests based on  $F_{ST}$  (*sensu* Lewontin & Krakaur 1973)  
714 do not incorporate information regarding putative phenotypic targets of selection nor  
715 environmental drivers of differentiation, often do not correct for neutral population structure (but  
716 see Lotterhos & Whitlock 2015), and will inevitably isolate a biased set of candidate loci  
717 (Hermisson 2009; Cruickshank & Hahn 2014). In the case of single-locus genotype-environment  
718 associations (reviewed in Rellstab *et al.* 2015; see also De Mita *et al.* 2013), information about  
719 possible environmental drivers is incorporated by assessing the association between allele

720 frequencies and environmental heterogeneity, yet without information regarding traits  
721 hypothesized to be influenced by selection (Schoville *et al.* 2012). Single-locus genome wide  
722 association studies (see next section; Supplemental Box S2) and quantitative trait loci (QTL)  
723 experiments (reviewed in Ritland *et al.* 2011, Hall *et al.* 2016) have also been used in trees,  
724 quantifying the differential effects of typed alleles on a given phenotype. Despite the  
725 shortcomings of these methods, such studies provide candidate loci that can be investigated in  
726 further detail (Tiffin & Ross-Ibarra 2014), which is particularly advantageous when resources are  
727 limited. Indeed, as discussed below, these approaches dominate the methods used to uncover  
728 complex traits (adaptive or otherwise) in trees.

### 729 ***Current progress in trees***

730 In light of the expectations outlined above for the architecture of quantitative traits under various  
731 evolutionary regimes, and the methods commonly used to detect these loci, we reviewed the lit-  
732 erature of single-locus genotype-phenotype associations (GPAs, which included associations to  
733 gene expression levels) from studies in forest trees. In doing so, we identified 52 articles across  
734 10 genera and 24 species with a total of 2113 GPAs (Supplemental Table S2, Supplemental  
735 File F2). Because most studies in trees do not report phenotypic effect sizes of individual loci  
736 (i.e., regression coefficients), we report  $r^2$  values which can be used to quantify the percent  
737 phenotypic variance explained by the associated locus. In cases where multiple SNPs from a  
738 given locus (e.g., a gene or scaffold) were associated to a trait, we averaged the  $r^2$  values for  
739 that locus. As with our review of trait heritability and  $Q_{ST}$ , we grouped phenotypic traits used in  
740 associations into twelve broad categories (in this case, no phenotypes fell into Survival or Seed  
741 and Seedling Properties groups). If traits important to tree conservation and industry are often of  
742 a polygenic basis, we would expect small to moderate effects from loci empirically associated to  
743 phenotype. Indeed, across the trait groups considered here, the mean  $r^2$  was 0.039, where  
744 80.79% ( $n = 1707$ ) of recorded estimates had  $r^2$  values less than 0.05, 18.78% ( $n = 397$ ) of  $r^2$

745 values falling between [0.05,0.22], and nine values of  $r^2$  greater than 0.22, which were all  
746 related to *Cronartium ribicola* resistance in *Pinus monticola* Douglas ex. D. Don (Figure 3a).

747         Of the twelve trait groups, all but those traits relating to both reproduction and herbivore  
748 and insect resistance had  $r^2$  estimates greater than 0.10, with traits relating to disease  
749 resistance, growth, leaf and needle properties, phenology, and wood properties each  
750 contributing over 10% of these outliers (Figure 3b). These small effects tend to also not account  
751 for much of the observed heritability, but can explain sizeable fractions in some instances (e.g.,  
752 primary metabolites in Eckert et al. 2012). Of the loci associated with expression levels,  $r^2$   
753 estimates were between 0.05 and 0.152 in all but one case (n = 54). We also assessed the  
754 propensity of individual loci to be associated to more than one phenotype or expression level  
755 across our literature review. Without correcting for the multiple associations of a locus to yearly  
756 phenotypes (e.g., bud flush 2009, bud flush 2010), we found that the average number of loci  
757 associated to multiple phenotypes per study was 6.00, while after correcting for multiple years  
758 the average number decreased to 5.42. The median number of SNPs utilized for association per  
759 study was 206, where 75% (39/52) of studies used less than 1,000 SNPs, eight studies using  
760 between 1,000-10,000 SNPs, four studies using between 29,000-35,000 SNPs, and one study  
761 utilizing 2,822,609 SNPs for association (all studies with greater than 10,000 SNPs were from  
762 either *Pinus* or *Populus* species).

### 763 *Are we out of the woods yet?*

764 From insight gained from the literature review of genotype-phenotype associations it seems that  
765 the vast majority of the genetic architecture of local adaptation and complex traits in trees remains  
766 largely unexplained using common GWAS methods (see also Box 1), a consistent pattern across  
767 the past decade of research in trees (Neale & Savolainen 2004; Savolainen et al. 2007; Čalić et  
768 al. 2015; Hall et al. 2017). Furthermore, it is likely that the estimates for percent variance  
769 explained are inflated due to a combination of QTLs that break down into smaller effect loci

770 (Remington 2015), the Beavis effect (Beavis 1994; Xu 2003), and the Winner's Curse (Görning  
771 et al. 2001; Zöllner & Pritchard 2007) where locus effects are inflated by using the same data for  
772 both gene identification and phenotypic prediction (see Box 1 in Josephs et al. 2017b for a  
773 detailed synopsis of these biases). Such a pattern suggests that, indeed, many of the traits im-  
774 portant to evolutionary, breeding, and conservation insight in trees are likely of a polygenic basis  
775 and that future studies must take this into account when seeking to identify the underlying loci.

776 Even within studies of model organisms, missing heritability is nothing new. Across taxa,  
777 missing heritability is less frequent within phenotypes of mono- to oligogenic bases (as seen for  
778 the *Cr2* major-gene resistant locus in *Pinus monticola*, Liu et al. 2017), as would be expected,  
779 and is a recurrent, pervasive shortcoming from genotype-phenotype associations of complex  
780 traits, particularly those maintaining single-locus perspectives. A number of explanations have  
781 been put forth to explain the missing heritability, such as epistasis (Hemani et al. 2013) and its  
782 inflationary effect on heritability estimates (Zuk et al. 2012), environmental or epigenetic inter-  
783 actions (Feldman & Lewontin 1975) as well as their inflationary effect on heritability estimates  
784 (Zuk et al. 2012), (unmeasured) low-frequency variants of large effect (Dickson et al. 2010),  
785 genetic or variance heterogeneity of individual alleles (Leiserson et al. 2013; *cf.* Box 1 in Nelson  
786 et al. 2013), or common variants with effect size below detection thresholds (Yang et al. 2010).  
787 As such, here we avoid supporting one causative hypothesis over another, particularly given the  
788 ongoing discussion within the literature, for which strengths and weakness for any viewpoint are  
789 apparent (e.g., Gibson et al. 2010), and because of the progress yet to be made in trees.

790 Indeed, the dissection of the genetic architectures underlying complex traits in trees is  
791 still in its nascency compared to the progress of model organisms (for which missing heritability  
792 is still an issue), and beyond issues of coverage, genomic saturation, and genomic resources  
793 (discussed below in The Path Forward), we must approach this issue with all possibilities in  
794 mind. Given the unique properties of the life histories, genome size and organization of many  
795 tree species, and the limited numbers of studies with large sets of molecular markers, causative

Lind *et al.*: Are we out of the woods yet?

796 sources of the missing heritability should be ruled out, or supported, as with any other  
797 hypothesis, particularly as we gain information from contemporary studies of trees that address  
798 shortcomings of those in the past. Further, we must keep in mind differences between functional  
799 and statistical gene action (Álvarez-Castro et al. 2007; Nelson et al. 2013; Huang & Mackay  
800 2016; Huber et al. 2017). In any case, it seems that sample sizes of single-locus approaches  
801 will need to be increased (Hall et al. 2016), albeit with diminishing returns (Boyle et al. 2017;  
802 Simons et al. 2017), to discover a higher proportion of the underlying loci in trees due to small to  
803 moderate additive effects. Alongside suggestions outlined in The Path Forward, incorporating  
804 investigations into such aspects of epistasis, dominance, pleiotropy, expression, GxE effects,  
805 and network analyses (when appropriate), may be a worthwhile complement (e.g., Lotterhos et  
806 al. 2017, Mähler et al. 2017, Mizrachi et al. 2017; Tan et al. 2017).

807         While the infinitesimal model will continue to prove to be immensely useful for breeding  
808 programs and for short-term evolutionary predictions, and we may find that the missing  
809 heritability in trees is truly due to consequences of the infinitesimal regime (as is often cited to  
810 be the majority consensus across taxa for missing heritability), it has been argued that the  
811 analysis paradigm for such studies is near its limits in describing the functional genetic  
812 architecture of quantitative traits, and that it is therefore necessary to move beyond single-locus  
813 perspectives and reconsider common practices (Pritchard & Di Rienzo 2010; Nelson et al. 2013;  
814 Sork et al. 2013; Tiffin & Ross-Ibarra 2014; Wadgyamar et al. 2017). At this stage, it seems that  
815 we investigators seeking to describe the genetic architecture of quantitative traits in trees have  
816 some ways yet to go before we are truly out of the woods. In the next section, we describe the  
817 path forward to describing genetic architectures from a polygenic and functional perspective,  
818 identify resources available to advance our knowledge and fill knowledge gaps, as well as future  
819 directions for this research area.



## 820 **The Path Forward**

821           As we have outlined, there is still ample room for improvement in our description and  
822 understanding of the genetic architecture of quantitative traits in trees (see Table 1 and Box 1).  
823 Importantly, methods used to uncover causative loci should take into consideration the expected  
824 degree of polygenicity, the relative contributions of various forms of gene action, as well as how  
825 past evolutionary phenomena has likely shaped current adaptive expectations. In this section,  
826 we orient our path forward by first highlighting utilities available to, and underused within, the  
827 forest genetics community to describe the genetic architecture of complex traits. We then outline  
828 several suggestions to facilitate further progress and advocate for prospective perspectives in  
829 future studies such that information and data may continue to be used easily in subsequent  
830 syntheses across pathways, environments, species, and towards insight to identify future  
831 needed resources as our understanding progresses. While our recommendations are specific to  
832 the tree community, we also acknowledge other valuable recommendations from recent reviews  
833 (e.g., Savolainen et al. 2013; Tiffin & Ross-Ibarra 2014; Lotterhos & Whitlock 2015; Gagnaire &  
834 Gaggiotti 2016; Hoban et al. 2016; Wellenreuther et al. 2016; Burghardt et al. 2017; Wadgyamar  
835 et al. 2017).

### 836 *Stepping off the path – what’s in our pack?*

837           The genetic architecture underlying local adaptation and complex traits likely has a  
838 polygenic basis composed of many loci of relatively weak effect yet many of the common  
839 association or outlier methods will often fail to detect many of the causative loci of small to  
840 moderate influence. Such investigations have so far led to an incomplete description of studied  
841 architectures, and, in many cases, have limited our understanding of complex traits in trees to a  
842 handful of loci. While we do not advocate that such single-locus methods be avoided in future  
843 studies (considered further in the next section), here we outline underused and promising  
844 approaches to identify and describe underlying loci that explicitly take into account the polygenic

845 basis of such traits and may help advance our understanding in future studies, including some  
846 of the questions we have outlined in Table 1. Multivariate, multiple regression, and machine  
847 learning techniques are three such examples, and differ from univariate analyses by analyzing  
848 patterns among multiple loci simultaneously.

849         The Bayesian sparse linear mixed model (BSLMM), for instance, such as that deployed  
850 in the software package `GEMMA` (Zhou et al. 2013), is developed for both genomic prediction (see  
851 also Box 1) and mapping of complex traits that offers considerable advantages over single-locus  
852 genotype-phenotype approaches (Guan & Stephens 2011; Ehret et al. 2012; Zhou et al. 2013;  
853 Moser et al. 2015). This analysis has gained in popularity recently, being used across diverse  
854 taxa such as stick insects (Comeault et al. 2015, Riesch et al. 2017), butterflies (Gompert et al.  
855 2015), Darwin's finches (Chaves et al. 2016), and trees (Lind et al. 2017). BSLMM is a hybrid of  
856 LMM and Bayesian variable regression that extends the Lande & Arnold (1983) multiple  
857 regression approach in an attempt to address the sparsity of common data sets used in  
858 genotype associations, where the number of model parameters (loci) is often much greater than  
859 the number of observations (sampled individuals; Zhou et al. 2013; Gompert et al. 2016).  
860 Specifically, the model takes into account relatedness among individuals and provides a means  
861 to summarize estimates of selection across the genome such as the proportion of phenotypic  
862 variation explained (PVE) across genotyped markers by estimating the combined influence of  
863 markers with either polygenic (infinitesimal) or measurable (moderate to large) effect, the  
864 proportion of PVE explained by genetic loci with measurable effects (PGE), and the number of  
865 loci with measurable effects that underlie the trait (for more details see Guan & Stephens 2011;  
866 Zhou et al. 2014; Gompert et al. 2016). Additionally, `GEMMA` returns the posterior inclusion  
867 probability for each marker providing evidence for association with the phenotype. While the  
868 approach remains promising considering its performance in the context of genomic prediction  
869 and inference of PVE (e.g., Zhou et al. 2013, Speed & Balding 2014), there has been no  
870 attempts, to our knowledge, to assess the approach under various demographic histories,

871 genetic architectures, and sampling designs. A close approximation to this comes from analyses  
872 carried out by Gompert et al. (2016), in which GEMMA was evaluated for PVE estimation,  
873 estimated effects of causative loci, and the estimated number of underlying SNPs based on  
874 various author-specified numbers of causal loci, underlying heritability ranges, and numbers of  
875 sampled individuals. In short, the authors convey that GEMMA is promising, but that there are  
876 important limitations to consider (Gompert et al. 2016). However, because the authors simulated  
877 architectures by randomly assigning effects to loci from an empirically-derived sequence data  
878 set, and while they were thorough in their data exploration, we encourage these results be  
879 replicated *in silico* through full modeling of genomic loci across various demographic, LD,  
880 sampling, and architecture scenarios to ensure underlying allele frequencies among populations  
881 and LD (within and among populations) reflect realistic patterns which may have an effect on  
882 model performance. Such additional analyses will also allow for more specific insight into model  
883 performance based on *a priori* biological insight available to investigators, allowing more  
884 informed decisions when choosing an appropriate genotype-phenotype association method  
885 such as BSLMM.

886 Random Forests (Breiman et al. 2001) is a machine learning algorithm used to identify  
887 patterns in highly dimensional data sets to further generate predictive models. Alongside uses  
888 outside of evolutionary biology, the Random Forests algorithm has gained popularity in  
889 association studies across taxa as well as in trees such as that of genotype-phenotype  
890 associations in Sitka spruce (*Picea sitchensis*; Holliday et al. 2012) and genotype-environment  
891 associations in white spruce (*P. glauca*; Hornoy et al. 2015). Random Forests is based upon  
892 classification (for discrete variables, e.g., soil type) and regression (continuous variables; e.g.,  
893 temperature or phenotypic measurements) trees (so-called CART models). During its  
894 implementation, Random Forests creates these decision trees using two layers of stochasticity:  
895 the first layer is used to grow each tree by using a bootstrap sample of observations  
896 (environmental or phenotypic) while the second uses a random subset of predictors (marker

897 loci) to create a node which is then split based on the best split of the observations across  
898 permutations of predictors using the residual mean square error (see Figure 2 in Hornoy et al.  
899 2015). The observations that were not used as training data to create the model are then used  
900 to estimate model accuracy, which can be further used to assess variable importance (Holliday  
901 et al. 2012; Hornoy et al. 2015; Forester et al. 2017).

902 While creating a promising alternative to univariate approaches, until recently the  
903 Random Forests algorithm has not been fully explored to assess model performance for use in  
904 association studies. Forester et al. (2017) provide a thorough analytical assessment using  
905 simulated data to remark on performance for use in genotype-environment association studies  
906 (GEA). In their analysis, they used published simulations of multilocus selection (Lotterhos &  
907 Whitlock 2014, 2015) of various demographic histories and selection intensities across 100  
908 causative (with 9900 neutral) loci to compare the Random Forests algorithm to the multivariate  
909 approaches of constrained ordination (redundancy analysis, RDA, and distance-based RDA,  
910 dbRDA - both of which are mechanistically described in Legendre & Legendre 2012, but are  
911 multivariate analogs of multiple regression on raw or distance-based data) and to the univariate  
912 latent factor mixed model (LFMM). In short, Forester et al. (2017) found that LFMM performed  
913 better than Random Forests as a GEA, while constrained ordinations resulted in relatively lower  
914 false positive and higher true positive rates across levels of selection than both Random Forests  
915 and LFMM. Additionally, the authors found that correction for population structure had little  
916 influence on true and false positive rates of ordination methods, but considerably reduced true  
917 positive rates of Random Forests. They also note that further testing is needed across various  
918 evolutionary scenarios. Even so, constrained ordination provides an effective means by which to  
919 detect loci under a range of both strong and weak selection (Forester et al. 2017). While  
920 promising under a GEA framework, future analyses may provide evidence that such methods  
921 also perform well in genotype-phenotype associations as well. Empirically, it has been used in  
922 trees to explore multivariate relationships between phenotypes, genotypes, and environments

923 (e.g., Sork et al. 2016). Additionally, there have been many extensions of the original Random  
924 Forests model, such that extensions with purportedly better performance should be assessed  
925 alongside other popular association methods in the future.

926         Once a set of candidate loci have been identified to putatively underlie a phenotype or  
927 environment of interest, these loci can be used to further test the hypothesis of polygenic local  
928 adaptation. For instance, Berg & Coop (2014) use the significant hits from GWAS data sets to  
929 estimate within-population additive genetic values by calculating the frequency-weighted sum of  
930 effects across these loci. These values are then compared to a null model of genetic drift that  
931 accounts for population structure to test for an excess of variance among populations, ultimately  
932 identifying the populations most strongly contributing to this signal. The excess variance statistic  
933 ( $Q_x$ ) is analogous to  $Q_{ST}$  and is composed of two quantities – an  $F_{ST}$ -like component describing  
934 allele frequency differentiation across populations and a LD-like component describing  
935 coordinated and subtle allele frequency shifts across populations. This method thus allows  
936 explicit hypothesis tests related to the expected polygenic architecture of local adaptation  
937 across populations of trees. It is also noteworthy in that it combines aspects of the genotype-  
938 environment-phenotypic spectrum that underlies local adaptation within a single methodological  
939 framework (cf. Sork et al. 2013). Prior attempts take a pairwise approach examining each  
940 pairwise combination of the genotype-environment-phenotype spectrum (e.g., Eckert et al.  
941 2015). Despite the promising insight from this method, it has not been used widely outside of  
942 model organisms. Future applications in trees should consider the number of causal loci  
943 identified to be associated with quantitative phenotypes (driven somewhat by the number of loci  
944 used in mapping studies), the number of populations needed to increase power, especially in  
945 the correlation of genetic values to environmental data, and the ability to reliably estimate  
946 genotypic effects.

947 *At the trail junction – where to next?*

948           While we have outlined methods above that have not yet realized their full potential in  
949 describing genetic architecture of complex traits in trees, there are several matters that we, as a  
950 field, must keep in mind such that we can continue to progress our understanding in the most  
951 efficient manner. Here we believe the path forward lies in three critical areas which we discuss  
952 in further detail below: 1) needed data, 2) standardized data reporting, and 3) empirical studies  
953 in trees designed to test theoretical expectations of genetic architectures.

#### 954 *Needed data*

955           While the common garden approach can facilitate understanding of evolutionary  
956 processes without specifically identifying underlying loci (Rausher & Delph 2015), identifying  
957 features of the genetic architecture will ultimately inform breeding applications important to  
958 management, conservation, and industry, and thus requires knowledge about underlying loci.  
959 Consequently, we have not yet had sufficient sampling of both marker densities and studies  
960 amenable to replication across systems to truly exhaust the use of single-locus approaches,  
961 particularly as the sample size of markers, individuals, and populations increase in the near  
962 future. Indeed, Hall et al. (2016) estimated that the number of causative loci underlying  
963 quantitative traits in trees is likely in the several hundreds, and to capture 50% of the heritable  
964 genetic variation using single-locus approaches, population sizes of about 200 will be needed  
965 for mapping disease traits, and about 25,000 for traits such as growth. Even so, we recommend  
966 that such single-locus associations should not be used as the sole method of architecture  
967 description as we carry out future studies unless justified *a priori* based on biological principles,  
968 knowledge of the expected architecture, and/or for testing specific hypotheses. While the limits  
969 of such methods should be considered, these approaches can be used alongside other lines of  
970 evidence to either support or spur further testing of underlying loci (*sensu* Sork et al. 2013). For  
971 instance, there is little downside to performing both a single-locus association and a multivariate  
972 analysis in the same study, even if some or all of the results for a given technique are excluded

973 to the supplement (e.g., Sork et al. 2016). Further, contextualizing genotype-phenotype and  
974 genotype-environment relationships with results that describe local adaptation (e.g., phenotype-  
975 environment,  $Q_{ST}$ - $F_{ST}$  comparisons) can also stimulate further understanding particularly for data  
976 that is made publically available for future synthesis. Specifically, studies which do so within the  
977 context of comparisons within and across species (e.g., Yeaman et al. 2016) or environments  
978 (Holliday et al. 2016), offer unique circumstances under which to advance our understanding of  
979 complex traits in trees (Table 1; Lotterhos & Whitlock 2015; Čalić et al. 2016; Hoban et al. 2016;  
980 Ingvarsson et al. 2016; Mahler et al. 2017).

981 Isozymes (Adams & Joly 1980), restriction fragment length polymorphisms (Devey et al.  
982 1994), randomly amplified DNA (Grattapaglia & Sederoff 1994), and expressed sequence tag  
983 polymorphisms (Temesgen et al. 2001) were among the first used to test evolutionary  
984 hypotheses in trees related to genome organization and the mapping of complex traits  
985 (discussed in Eckert et al. 2009). Marker technology has progressed considerably since this  
986 time (dozens of markers) to include markers capable of more densely sampling tree genomes  
987 (up to millions of markers). For example, array-based designs (Silva-Junior et al. 2015) and  
988 exome capture (Suren et al. 2016) allow for hundreds to tens of thousands of both genic and  
989 intergenic markers (which can be dwarfed by the number of subsequently called SNPs)  
990 whereas RADseq (reviewed in Parchman et al. in review) is in the range of tens- to hundreds of  
991 thousands of markers (e.g., Parchman et al. 2012) and whole genome sequencing in the range  
992 of millions (e.g., Stölting et al. 2015). However, while the continual advent of sequencing  
993 technology will likely allow for more SNPs and longer sequences, it is ultimately the  
994 concordance between polygenic expectations and analytical methods of marker data that will  
995 determine the success of such endeavors. With this in mind, future studies aimed at answering  
996 outstanding questions (Table 1) will benefit from a diverse set of markers that represent both  
997 functional proteins (genic regions) as well as those which control aspects of their expression or  
998 post-transcriptional regulation. If one lesson is to be gained from the recent discussion of the

999 applicability of reduced representation techniques (Lowry et al. 2016, 2017; Catchen et al. 2017;  
1000 McKinney et al. 2017), it is that genomic resources are paramount to advancement of  
1001 knowledge, especially when developed with knowledge of patterns of linkage disequilibrium or,  
1002 if not with this knowledge, with goal of quantifying it. However, RADseq remains one of the most  
1003 cost-effective approaches available to trees and should thus be assessed in the specific context  
1004 of tree species, particularly when strengths and limitations are understood and addressed (as  
1005 reviewed in Parchman et al. forthcoming). No matter the approach used for association, some  
1006 aspect of the architecture is likely to be missed in trees. For example, RADseq-based markers  
1007 developed within large genomes are not enriched within genic regions where structural changes  
1008 to proteins are expected to affect phenotypes, although choice of enzymes can affect the  
1009 relative proportion of genic regions in tree genomes, as evidenced from *in silico* digestions of  
1010 reference genomes from *Populus*, *Eucalyptus*, *Amborella*, *Pseudotsuga*, and *Pinus* species  
1011 (Parchman et al. forthcoming). In contrast, exome based approaches are anchored within  
1012 coding regions thus excluding putative regulatory elements outside of the exomic regions used  
1013 to develop probes. Recent marker development approaches, such as RAPTURE (Ali et al.  
1014 2016), however, have blurred the lines between RADseq and exome based approaches and, in  
1015 addition to targeted capture approaches, may offer a promising, cost-effective path forward that  
1016 explicitly avoids biased assumptions about the importance of exomic versus intergenic loci  
1017 comprising the architecture of local adaptation.

1018       Beyond dense genetic linkage maps (e.g., Friedline et al. 2015) and reference genomes,  
1019 which undoubtedly should be among our top priorities, other techniques outside of traditional  
1020 genomics, such as transcriptomics, have the potential to complement genomic studies in many  
1021 ways without great need for existing species-specific resources (reviewed in Romero et al.  
1022 2012, Strickler et al. 2012; Vialette-Guiraud et al. 2016). For instance, comparative  
1023 transcriptomic techniques in trees can be used to identify putatively orthologous sets of markers  
1024 (e.g., Wachowiak et al. 2015; Yeaman et al. 2016) that can be used to describe the evolution of



1025 architecture (e.g., shared orthologs versus paralogs across species) or for comparative linkage  
1026 mapping (Ritland *et al.* 2011) across systems. Additionally, with the appropriate study design,  
1027 transcriptomics can be implemented in tree species to describe various aspects of differential  
1028 expression (Cohen *et al.* 2010; Carrasco *et al.* 2017; Cronn *et al.* 2017), selective constraint  
1029 (Mähler *et al.* 2017), prevailing selective forces (Hodgins *et al.* 2016), mapping of disease  
1030 resistance (Liu *et al.* 2016; Liu *et al.* 2017), and regulatory networks (Zinkgraf *et al.* 2017). The  
1031 multilocus paradigm of transcriptomics is amenable to identifying and testing hypotheses of the  
1032 genetic architecture of complex traits in a network framework (Jansen *et al.* 2009; Leiserson *et al.*  
1033 *al.* 2013; Civelek & Lusi 2014; Feltus 2014) and will no doubt provide valuable contributions for  
1034 tree evolutionary biologists. Other areas amenable to network description such as metabolomics  
1035 and proteomics would also be a complement (Feltus 2014; Cowen *et al.* 2017), particularly if  
1036 genetic studies contextualize results with findings from such approaches and vice versa.  
1037 Ultimately the goal is to use *a priori* knowledge synthesized across past studies, techniques,  
1038 and perspectives to guide further hypotheses about underlying architecture, as exemplified by  
1039 Mizrachi *et al.* (2017) and Lotterhos *et al.* (2017). Finally, high-throughput phenotyping as well  
1040 as environmental measures at fine spatial scales below square-kilometers will also facilitate and  
1041 advance our understanding of complex traits in trees (Sork *et al.* 2013; Rellstab *et al.* 2015;  
1042 Leempoel *et al.* 2017), particularly when measured phenotypes well represent those  
1043 experiencing selection pressure, and environmental measures well represent the multivariate  
1044 environment imposing selection (Lotterhos *et al.* 2017).

#### 1045 ***Standardized data reporting***

1046 As we continue to accrue genotype-phenotype, genotype-environment, and phenotype-  
1047 environment relationships within and across tree species, authors should consider how their  
1048 results can most effectively be used in further studies and syntheses, both for the purpose of  
1049 validation or comparison as well as novel insights yet to be seen. Here we outline a few

1050 suggestions that can be broken down into reporting within manuscripts and metadata. For  
1051 instance, in our survey of common garden studies used to estimate  $h^2$  and  $Q_{ST}$ , in many cases  
1052 the exact design of the study could not be replicated with the information from the manuscript  
1053 alone. While an abbreviated design may be suitable for the main text, authors can provide much  
1054 more detail in supplemental materials that can facilitate replication and comparison across  
1055 studies (e.g., total individuals per garden, family, or block – as opposed to averages or ranges),  
1056 which will ultimately facilitate syntheses regarding future directions. Further, future studies  
1057 would benefit from estimating relatedness using marker data which will ultimately improve the  
1058 precision of  $h^2$ ,  $Q_{ST}$ , and missing heritability estimates (de Villemereuil et al. 2016) including  
1059 those estimates made in the field (Castellanos et al. 2015). For cases in which estimating  
1060 relatedness from markers is not appropriate or feasible, the field would benefit by authors  
1061 exploring a range of underlying sibships (e.g., Eckert et al. 2015), which are often assumed to  
1062 be half-sib relationships. While some studies in our survey assumed a mixed sibship  
1063 relationship for open-pollinated sources, ultimately such assumptions without data exploration  
1064 will affect the outcome or conclusions for any given study. A recently released R package by  
1065 Gilbert and Whitlock (2014) allows for such an exploration of effects of mixed sibships on  
1066 inference of  $Q_{ST}$  and its magnitude relative to  $F_{ST}$ . Inclusion of such exploration, even in the  
1067 supplement, will help contextualize such studies as they are published. For studies estimating  
1068 causality for genotype to phenotype, it would be worthwhile to include the regression  
1069 coefficients or other estimates of effect size (e.g., odds ratios) in addition to PVE ( $r^2$ ).  
1070 Importantly, the units of the effect size must be explicitly reported (e.g., Julian days versus  
1071 phenotypic standard deviations), with the standard deviation also reported. For all association  
1072 studies, supplemental tab- or comma-delimited text files (outside of a word processing  
1073 document) easily analyzed with programming languages would also facilitate synthesis (even if  
1074 providing redundant information from the main text), particularly if such files are well described  
1075 with a README file and contained data regarding marker position, putative orthogroups, hits to

Lind *et al.*: Are we out of the woods yet?

1076 reference genomes, effect size, PVE, genotypes by individual identifiers, individual population  
1077 assignments, and if the sequence or marker was significantly associated to phenotype or  
1078 environment. Such an operating procedure may work well in the short term, however in the long  
1079 term such information will need to be easily accessible from one or a central hub of repositories.

1080 Data standardization, the inclusion of meta-information, and compilation of these data  
1081 specific to trees into a database with common terminology will be crucial to future inquiries with  
1082 the purpose of synthesizing evidence for underlying architectures across species and  
1083 environmental systems (e.g., as for human GWAS data: <https://www.ebi.ac.uk/gwas/>). If the  
1084 data generated by tree biologists is disparate and housed across databases and journal  
1085 supplements this impedes synthesis first by forcing scientists to collate information across  
1086 sources, which may be further impeded by data redundancies or inconsistencies in data format  
1087 and utilized nomenclature (Wegrzyn et al. 2012). While many journals have required submission  
1088 of sequence data to repositories such as NCBI, such databases are lacking with regard to  
1089 information pertaining to phenotypic, environmental, and geographic information upon which  
1090 much of the foundation of our field is built. Submissions to Dryad somewhat overcome this, but  
1091 there is no standardization within the community for content for such submissions and important  
1092 information may be lacking. Currently, this information is often appended in supplemental files  
1093 that cannot be readily accessed, compared, or queried in an efficient manner. Hierarchical  
1094 ontologies can be used to ease this burden. Gene Ontology is likely the most recognizable to  
1095 evolutionary biologists, but there also exist Plant Ontologies for organismal structure and  
1096 developmental stages, Environmental Ontologies for habitat categorization, and Phenotypic,  
1097 Attribute, and Trait Ontologies for the annotation of phenotypes. Such ontologies not only  
1098 standardize nomenclature, but also assist in database queries. The utilization of such databases  
1099 will no doubt encourage comparative studies and syntheses, as infrastructure and data  
1100 accessibility are essential to the comparative approach (Neale et al. 2013; Ingvarsson et al.  
1101 2016; Plomion et al. 2016). Luckily, such a database exists for the broader tree genetics

Lind *et al.*: Are we out of the woods yet?

1102 community. The open-source genomics and phenomics database, called TreeGenes  
1103 (treegenesdb.org), is part of a central hub of repositories, including the Hardwood Genomics  
1104 Project (hardwoodgenomics.org) and the Genome Database for Roseaceae (rosaceae.org), that  
1105 communicate and integrate data from each other. Unlike many other repositories for tree  
1106 genomic data, TreeGenes is not project or institution specific. The data and metadata for  
1107 roughly 1700 species housed on TreeGenes can be accessed, queried, and visualized through  
1108 DiversiTree, a web-based, desktop-style interface (Wegrzyn et al. 2008). DiversiTree connects  
1109 to the geographical interface CartograTree (Vasquez-Gross et al. 2013) to encourage  
1110 comparative synthesis by providing technology to filter and visualize geo-referenced biotic and  
1111 abiotic data housed on TreeGenes. As promising as such database hubs are, they are only as  
1112 useful as the data that is deposited to them. While TreeGenes will regularly import and enhance  
1113 data from public repositories (through e.g., sequence alignment to published genomes, or data  
1114 from Genbank, Phytozome, PLAZA, etc), often pertinent metadata necessary for comparative  
1115 synthesis is lacking (Wegrzn et al. 2008, 2012). Indeed, from our survey of published GPA since  
1116 the release of the database in 2008, less than 13% (6/48) of the studies submitted their data  
1117 directly to TreeGenes. To better prepare for future synthesis, we advocate that authors submit  
1118 their data to the TreeGenes database and that reviewers and editors enforce this habit, as  
1119 currently implemented for linkage maps published in *Tree Genetics & Genomes*. Consolidated,  
1120 open-source resources will be crucial to the advancement of this field (Neale et al. 2013), and  
1121 will no doubt spur knowledge that would not have been recognized otherwise. Prime examples  
1122 of advancement to knowledge because of these types of resources and community-wide efforts  
1123 come from the human GWAS literature where such resources provide crucial information  
1124 necessary to study polygenic adaptation (e.g., Berg & Coop 2014).

### 1125 ***Empirical tests of theory***

1126 In combination with the development of truly genome-wide public resources, there is

1127 need to use these resources to validate and better characterize foundational ideas and  
1128 assumptions in the theory of polygenic adaptation relative to the life history strategies of tree  
1129 species. For example, Gagnaire & Gaggiotti (2016) highlight that the degree of polygenicity can  
1130 be tested as a function of the number of GWAS hits relative to the length of contigs or  
1131 chromosomes containing these markers. Simple models of polygenicity predict that there should  
1132 be a positive correlation between these quantities. Thus, rather than assuming some functional  
1133 form of a polygenic architecture (i.e., an approximate infinitesimal model) during analysis,  
1134 researchers can strive to characterize, or at least exclude some forms of, the underlying genetic  
1135 architecture prior to interpretation. In a related fashion, publically available data sets would spur  
1136 comparisons across species and study systems to test hypotheses about polygenic  
1137 architectures (e.g., the modularity of genetic architectures as in Lotterhos et al. 2017, or  
1138 perhaps genomic organization or effect size distribution) due to the relative timing of selection,  
1139 degree of environmental contrast (e.g., diversifying selection and changes to the strength of  
1140 negative selection), selection strength, and level of gene flow across diverging lineages. As an  
1141 example, much of the theory of polygenic adaptation requires assumptions about simplistic  
1142 demographics (where violations have consequences for standing levels of non-neutral diversity,  
1143 e.g., Wang et al. 2017) and the equilibration among co-acting evolutionary forces over a large  
1144 number of generations (Brandvain & Wright 2016). Indeed, differing architectures are expected  
1145 as a function of the timing for the onset of selection (Le Corre & Kremer 2003; Kremer & Le  
1146 Corre 2012), with subtle allele frequency shifts across populations dominating architectures  
1147 near the onset of selection and larger allele frequency shifts much later in time. While there is  
1148 need for empirical validation of this theory, there is also a need to characterize the prevalence of  
1149 its predicted patterns across differing clades of tree species. In other words, researchers could  
1150 imagine testing the theory itself in natural populations (e.g., as begun by Le Corre & Kremer  
1151 2012) or assuming its validity and characterizing the circumstances under which to expect large  
1152 shifts in allele frequencies across tree species with differing life history strategies. Little of any of

1153 this (Table 1), however, will be possible without development of needed data and its deposition  
1154 into publically available, standardized databases.

## 1155 **Concluding Remarks**

1156 The path forward provides a means by which we can most efficiently describe the  
1157 underlying genetic architectures of traits important to management, conservation, and industry,  
1158 which can ultimately be used to expedite breeding projects (Box 1). The past evolutionary  
1159 history will have a profound effect on the underlying genetic architecture of such traits, and thus  
1160 strengths and weakness of the data and methods used to uncover such architecture should be  
1161 specifically addressed in the future, particularly in how utilized methods perform across various  
1162 demographic and architecture scenarios. Insights gained from empirically testing theory will also  
1163 contribute to the advancement of this field and will ultimately quantify the variation in archi-  
1164 tecture across environments and species and inform effective management. Importantly, the  
1165 success of future genotype-phenotype efforts should not be predicated on past studies using  
1166 single-locus approaches and small numbers of markers, and instead on overcoming such  
1167 shortcomings by applying theoretical expectations to empirical inquiry. Even so, until  
1168 sequencing technologies allow for cost-effective whole genome sequencing of individual trees,  
1169 most genotype-phenotype studies (GS included) will be carried out via reduced representation  
1170 techniques (i.e., a subset of all sites within the genome). Therefore, it is essential that  
1171 processed data be uploaded to a repository that, in addition to raw sequences, includes  
1172 genotypic, environmental, and spatial data, facilitates user-friendly queries, and allows for future  
1173 meta-analysis. The future is bright, but we are not yet out of the woods. As such, efficient  
1174 advancement in this field relies on community efforts, standardized reporting, centralized open-  
1175 access databases, and continual input and review within the community's research.

## 1176 **Acknowledgements**

1177 The authors would like to thank S. González-Martínez for inviting this review, Chris Friedline for

Lind *et al*: Are we out of the woods yet?

1178 stimulating conversations when developing content, and Justin Bagley, Jill Wegrzyn, and two  
1179 anonymous reviewers for providing helpful comments to earlier versions of this manuscript.  
1180 Brandon Lind is supported through a Dissertation Fellowship provided by the Graduate School  
1181 of Virginia Commonwealth University. Andrew Eckert is supported through the National Science  
1182 Foundation (EF-1442486) and the United States Department of Agriculture (USDA 2016-67013-  
1183 24469).

## 1184 **References**

- 1185 Adams WT, Joly RJ (1980) Linkage relationships among twelve allozyme loci in loblolly pine. *J*  
1186 *Heredity* 71:199–202
- 1187 Alberto FJ, Aitken SN, Alía R (2013) Potential for evolutionary responses to climate change—  
1188 evidence from tree populations. *Global Change Biology* 19:1645–1661. doi:  
1189 <https://doi.org/10.1111/gcb.12181>
- 1190 Ali, O. A., O’Rourke, S. M., Amish, S. J., Meek, M. H., Luikart, G., Jeffres, C., & Miller, M. R.  
1191 (2016). RAD capture (Rapture): flexible and efficient sequence-based genotyping. *Genetics*,  
1192 202(2), 389-400. doi: <https://doi.org/10.1534/genetics.115.183665>
- 1193 Álvarez-Castro JM, Carlborg O. A unified model for functional and statistical epistasis and its  
1194 application in quantitative trait loci analysis. *Genetics*. 2007; 176: 1151–1167. doi:  
1195 <https://doi.org/10.1534/genetics.106.067348>
- 1196 Anderson JT, LEE C-R, Rushworth CA, et al. (2012) Genetic trade-offs and conditional  
1197 neutrality contribute to local adaptation. *Molecular Ecology* 22:699–708. doi:  
1198 <https://doi.org/10.1111/j.1365-294X.2012.05522.x>
- 1199 Arnold SJ (1992) Constraints on phenotypic evolution. *The American Naturalist* 140:S85–S107.  
1200 doi: 1 <https://doi.org/10.1086/285398>
- 1201 Ashander J, Chevin L-M, Baskett ML (2016) Predicting evolutionary rescue via evolving  
1202 plasticity in stochastic environments. *Proceedings of the Royal Society B: Biological*  
1203 *Sciences* 283:20161690–10. doi: <https://doi.org/10.1098/rspb.2016.1690>
- 1204 Ávila V, Pérez-Figueroa A, Caballero A, et al. (2014) The action of stabilizing selection,  
1205 mutation, and drift on epistatic quantitative traits. *Evolution* 68:1974–1987. doi:  
1206 <https://doi.org/10.1111/evo.12413>
- 1207 Bailey SF, Bataillon T (2016) Can the experimental evolution programme help us elucidate the  
1208 genetic basis of adaptation in nature? *Molecular Ecology* 25:203–218. doi:  
1209 <https://doi.org/10.1111/mec.13378>
- 1210 Barrett R, Schluter D (2008) Adaptation from standing genetic variation. *Trends in Ecology &*  
1211 *Evolution* 23:38–44. doi: <https://doi.org/10.1016/j.tree.2007.09.008>
- 1212 Barton NH (2017) How does epistasis influence the response to selection? *Heredity* 118:96–109.  
1213 doi: <https://doi.org/10.1038/hdy.2016.109>
- 1214 Barton NH (1990) Pleiotropic models of quantitative variation. *Genetics* 124:773–782.



- 1215 Barton NH (1999) Clines in polygenic traits. *Genetical Research* 74:223–236. doi:  
1216 <https://doi.org/10.1017/S001667239900422X>
- 1217 Barton NH, Etheridge AM, Véber A (2016) The infinitesimal model. *bioRxiv* 1–54. doi:  
1218 <https://doi.org/10.1101/039768>
- 1219 Beavis W. 1994. The power and deceit of QTL experiments: lessons from comparative QTL  
1220 studies. Proceedings of the forty-ninth annual corn and sorghum industry research  
1221 conference. Chicago, IL, USA: American Seed Trade Association, 250–266.
- 1222 Béréros et al. (2014) Estimating quantitative genetic parameters in wild populations: a  
1223 comparison of pedigree and genomic approaches. *Molecular Ecology* 23: 3434-3451.  
1224 <https://doi.org/10.1111/mec.12827>
- 1225 Berg JJ, Coop G (2014) A Population Genetic Signal of Polygenic Adaptation. *PLoS Genetics*  
1226 10:e1004412. doi: <https://doi.org/10.1371/journal.pgen.1004412>
- 1227 Bernardo R, Yu JM. 2007. Prospects for genomewide selection for quantitative traits in maize.  
1228 *Crop Science* 47: 1082–1090.
- 1229 Berry AJ, Ajioka JW, Kreitman M (1991) Lack of polymorphism on the *Drosophila* fourth  
1230 chromosome resulting from selection. *Genetics* 129:1111–1117.
- 1231 Bessega C, Pometti C, Ewens M et al. (2015) Evidences of local adaptation in quantitative traits  
1232 in *Prosopis alba* (Leguminosae). *Genetica* 143: 31. doi:10.1007/s10709-014-9810-5
- 1233 Blanquart F, Kaltz O, Nuismer SL, Gandon S (2013) A practical guide to measuring local  
1234 adaptation. *Ecology Letters* 16:1195–1205. doi: 10.1111/ele.12150
- 1235 Bontemps et al. (2016) In situ marker-based assessment of leaf trait evolutionary potential in a  
1236 marginal European beech population. *Journal of Evolutionary Biology* 29: 514-527.
- 1237 Boshier D, Broadhurst L, Cornelius J, et al (2015) Is local best? Examining the evidence for  
1238 local adaptation in trees and its scale. *Environmental Evidence* 4:1–10. doi:  
1239 10.1186/s13750-015-0046-3
- 1240 Bower AD, Aitken SN (2008) Ecological genetics and seed transfer guidelines for *Pinus*  
1241 *albicaulis* (Pinaceae). *American Journal of Botany* 95:66–76.
- 1242 Boyle EA, Li YI, Pritchard JK (2017) An Expanded View of Complex Traits: From Polygenic to  
1243 Omnigenic. *Cell* 169:1177–1186. doi: 10.1016/j.cell.2017.05.038
- 1244 Brandvain Y, Wright SI (2016) The Limits of Natural Selection in a Non-equilibrium World.  
1245 *Trends in Genetics* 32:201–210. doi: 10.1016/j.tig.2016.01.004

- 1246 Breiman, L. (2001). Random Forests. *Machine Learning*, 45(1), 5–32.  
1247 <http://doi.org/10.1023/A:1010933404324>
- 1248 Budde KB, Heuertz M, Hernandez-Serrano A et al. (2014) In situ genetic association for  
1249 serotiny, a fire-related trait, in Mediterranean maritime pine (*Pinus pinaster*). *New*  
1250 *Phytologist* 201:230–241.
- 1251 Bulmer MG (1980) The mathematical theory of quantitative genetics. *Genetical research* 19: 17-  
1252 25.
- 1253 Bürger R (1999) Evolution of Genetic Variability and the Advantage of Sex and Recombination  
1254 in Changing Environments. *Genetics* 153:1055–1069.
- 1255 Bürger R, Akerman A (2011) The effects of linkage and gene flow on local adaptation: A two-  
1256 locus continent-island model. *Theoretical Population Biology* 80:272–288. doi:  
1257 10.1016/j.tpb.2011.07.002
- 1258 Bürger R, Lynch M (1995) Evolution and extinction in a changing environment: a quantitative-  
1259 genetic analysis. *Evolution* 49:151–163. doi: 10.2307/2410301
- 1260 Burghardt LT, Young ND, Tiffin P (2017) A Guide to Genome-Wide Association Mapping in  
1261 Plants. *Current Protocols in Plant Biology*. doi: 10.1002/cppb.20041
- 1262 Caballero A, Tenesa A, Keightley PD (2015) The nature of genetic variation for complex traits  
1263 revealed by GWAS and regional heritability mapping analyses. *Genetics* 201:1601-1613.
- 1264 Čalić I, Bussotti F, Martínez-García PJ, Neale DB (2015) Recent landscape genomics studies in  
1265 forest trees. *Tree Genetics & Genomes* 1–7. doi: 10.1007/s11295-015-0960-0
- 1266 Carlborg Ö, Haley CS (2004) Epistasis: too often neglected in complex trait studies? *Nature*  
1267 *Reviews Genetics* 5:618–625. doi: 10.1038/nrg1407
- 1268 Carrasco A, Wegrzyn JL, Durán R, et al (2017) Expression profiling in *Pinus radiata* infected  
1269 with *Fusarium circinatum*. *Tree Genetics & Genomes* 13:1665. doi: 10.1007/s11295-017-  
1270 1125-0
- 1271 Carter AJR, Hermisson J, Hansen TF (2005) The role of epistatic gene interactions in the  
1272 response to selection and the evolution of evolvability. *Theoretical Population Biology*  
1273 68:179–196. doi: 10.1016/j.tpb.2005.05.002
- 1274 Catchen JM, Hohenlohe PA, Bernatchez L, et al (2017) Unbroken: RADseq remains a powerful  
1275 tool for understanding the genetics of adaptation in natural populations. *Molecular Ecology*  
1276 *Resources* 17:362–365. doi: 10.1111/1755-0998.12669

- 1277 Charlesworth, B. 2013. Background selection 20 years on: The Wilhelmine E. Key 2012  
1278 Invitational Lecture. *Journal of Heredity* 104: 161-171.
- 1279 Charlesworth B, Charlesworth D (2010) *Elements of Evolutionary Genetics*. Greenwood Village,  
1280 CO: Roberts and Company Publishers. 734 pp.
- 1281 Chaves, J. A., Cooper, E. A., Hendry, A. P., Podos, J., De León, L. F., Raeymaekers, J. A. M., et  
1282 al. (2016). Genomic variation at the tips of the adaptive radiation of Darwin's finches.  
1283 *Molecular Ecology*, 25(21), 5282–5295. <http://doi.org/10.1111/mec.13743>
- 1284 Cheverud JM, Routman EJ (1995) Epistasis and its contribution to genetic variance components.  
1285 *Genetics* 139:1455–1461.
- 1286 Chevin L-M (2012) Genetic constraints on adaptation to a changing environment. *Evolution*  
1287 67:708–721. doi: 10.1111/j.1558-5646.2012.01809.x
- 1288 Chevin L-M, Hoffmann AA (2017) Evolution of phenotypic plasticity in extreme environments.  
1289 *Philosophical Transactions of the Royal Society B: Biological Sciences* 372:20160138–12.  
1290 doi: 10.1098/rstb.2016.0138
- 1291 Chevin L-M, Lande R, Mace GM (2010a) Adaptation, Plasticity, and Extinction in a Changing  
1292 Environment: Towards a Predictive Theory. *PLoS Biol* 8:e1000357–8. doi:  
1293 10.1371/journal.pbio.1000357
- 1294 Chevin L-M, Martin G, Lenormand T (2010b) Fisher's model and the genomics of adaptation:  
1295 Restricted pleiotropy, heterogenous mutation, and parallel evolution. *Evolution* 64:3213–  
1296 3231. doi: 10.1111/j.1558-5646.2010.01058.x
- 1297 Chevin L-M, Hospital F (2008) Selective sweep at a quantitative trait locus in the presence of  
1298 background genetic variation. *Genetics* 180:1645–1660. doi: 10.1534/genetics.108.093351
- 1299 Chevin L-M, Lande R (2011) Adaptation to marginal habitats by evolution of increased  
1300 phenotypic plasticity. *Journal of Evolutionary Biology* 24:1462–1476. doi: 10.1111/j.1420-  
1301 9101.2011.02279.x
- 1302 Cheplick GP (2015) *Approaches to Plant Evolutionary Ecology*. Oxford University Press, USA.
- 1303 Civelek M, Lusk AJ (2013) Systems genetics approaches to understand complex traits. *Nature*  
1304 Publishing Group 15:34–48. doi: 10.1038/nrg3575
- 1305 Cockerham CC (1954) An Extension of the Concept of Partitioning Hereditary Variance for  
1306 Analysis of Covariances among Relatives When Epistasis Is Present. *Genetics* 39:859–882.
- 1307 Cohen D, Bogeat-Triboulot M-B, Tisserant E, et al. (2010) Comparative transcriptomics of

- 1308 drought responses in *Populus*: a meta-analysis of genome-wide expression profiling in  
1309 mature leaves and root apices across two genotypes. *BMC Genomics* 11:630. doi:  
1310 10.1186/1471-2164-11-630
- 1311 Collins S, de Meaux J, Acquisti C (2007) Adaptive walks toward a moving optimum. *Genetics*  
1312 176:1089–1099. doi: 10.1534/genetics.107.072926
- 1313 Comeault AA, Flaxman SM, Riesch R, et al. (2015) Selection on a genetic polymorphism  
1314 counteracts ecological speciation in a stick insect. *Current Biology* 25:1975–1981. doi:  
1315 10.1016/j.cub.2015.05.058
- 1316 Comeault AA, Soria-Carrasco V, Gompert Z, et al. (2014) Genome-wide association mapping of  
1317 phenotypic traits subject to a range of intensities of natural selection in *Timema cristinae*.  
1318 *The American Naturalist* 183:711–727. doi: 10.1086/675497
- 1319 Cornelius J (1994) Heritabilities and additive genetic coefficients of variation in forest trees. *Can*  
1320 *J For Res* 24:372–379. doi: 10.1139/x94-050
- 1321 Costanza R, d'Arge R, De Groot R, et al. (1997) The value of the world's ecosystem services  
1322 and natural capital. *Nature* 387:253-260. doi: <http://dx.doi.org/10.1038/387253a0>
- 1323 Cowen L, Ideker T, Raphael BJ, Sharan R (2017) Network propagation: a universal amplifier of  
1324 genetic associations. *Nat Ecol Evol* 18:551–562. doi: 10.1038/nrg.2017.38
- 1325 Cronn R, Dolan PC, Jogdeo S, et al. (2017) Transcription Through The Eye Of A Needle: Daily  
1326 And Annual Cycles Of Gene Expression Variation In Douglas-Fir Needles. bioRxiv. doi:  
1327 10.1101/117374
- 1328 Crow JF (2010) On epistasis: why it is unimportant in polygenic directional selection.  
1329 *Philosophical Transactions of the Royal Society B: Biological Sciences* 365:1241–1244.  
1330 doi: 10.1098/rstb.2009.0275
- 1331 Crow JF (2008) Maintaining evolvability. *Journal of genetics* 87:349–353. doi: 10.1007/s12041-  
1332 008-0057-8
- 1333 Cruickshank TE, Hahn MW (2014) Reanalysis suggests that genomic islands of speciation are  
1334 due to reduced diversity, not reduced gene flow. *Molecular Ecology* 23:3133–3157. doi:  
1335 10.1111/mec.12796
- 1336 Csilléry K, Lalagüe H, Vendramin GG, González-Martínez SC, Fady B, Oddou-Muratorio S  
1337 (2014) Detecting short spatial scale local adaptation and epistatic selection in climate-  
1338 related candidate genes in European beech (*Fagus sylvatica*) populations. *Molecular*  
1339 *Ecology* 23:4696–4708.

- 1340 La Torre De AR, Li Z, Van de Peer Y, Ingvarsson PK (2017) Contrasting Rates of Molecular  
1341 Evolution and Patterns of Selection among Gymnosperms and Flowering Plants. *Molecular*  
1342 *Biology and Evolution* 34:1363–1377. doi: 10.1093/molbev/msx069
- 1343 De Mita S, Thuillet A-C, Gay L, et al. (2013) Detecting selection along environmental gradients:  
1344 analysis of eight methods and their effectiveness for outbreeding and selfing populations.  
1345 *Molecular Ecology* 22:1383–1399. doi: 10.1111/mec.12182
- 1346 Devey ME, Fiddler TA, Liu BH, Knapp SJ, Neale DB (1994) An RFLP linkage map for loblolly  
1347 pine based on a three-generation outbred pedigree. *Theor Appl Genet* 88:273–278
- 1348 de Villemereuil P, Gaggiotti OE, Mouterde M, Till-Bottraud I (2015) Common garden  
1349 experiments in the genomic era: new perspectives and opportunities. *Heredity* 116:249–254.  
1350 doi: 10.1038/hdy.2015.93
- 1351 de Visser JAGM, Cooper TF, Elena SF (2011) The causes of epistasis. *Proc Biol Sci* 278:3617–  
1352 3624. doi: 10.1098/rspb.2011.1537
- 1353 de Vladar HP, Barton N (2014) Stability and response of polygenic traits to stabilizing selection  
1354 and mutation. *Genetics*. doi: 10.1534/genetics.113.159111/-/DC1
- 1355 Devlin B, Roeder K (1999) Genomic control for association studies. *Biometrics* 55:997-1004.
- 1356 Dickson, S. P., Wang, K., Krantz, I., Hakonarson, H., & Goldstein, D. B. (2010). Rare variants  
1357 create synthetic genome-wide associations. *PLoS biology*, 8(1), e1000294.
- 1358 Dittmar EL, Oakley CG, Conner JK, et al. (2016) Factors influencing the effect size distribution  
1359 of adaptive substitutions. *Proc Biol Sci* 283:20153065–8. doi: 10.1098/rspb.2015.3065
- 1360 Donohue K, Rubio de Casas R, Burghardt L, Kovach K, Willis CG (2010) Germination, post-  
1361 germination adaptation, and species ecological ranges. *Annual Review of Ecology*  
1362 *Evolution and Systematics* 41:293–319.
- 1363 Du, J., & Groover, A. (2010, January). Transcriptional regulation of secondary growth and wood  
1364 formation. *Journal of Integrative Plant Biology*.
- 1365 East EM (1910) A Mendelian interpretation of variation that is apparently continuous. *The*  
1366 *American Naturalist* 44:65–82.
- 1367 Eckert AJ, Bower AD, Jermstad KD, et al. (2013a) Multilocus analyses reveal little evidence for  
1368 lineage-wide adaptive evolution within major clades of soft pines (*Pinus* subgenus *Strobus*).  
1369 *Molecular Ecology* 22:5635–5650. doi: 10.1111/mec.12514
- 1370 Eckert AJ, Maloney PE, Vogler DR, et al. (2015) Local adaptation at fine spatial scales: an

- 1371 example from sugar pine (*Pinus lambertiana*, *Pinaceae*). *Tree Genetics & Genomes* 11:1-  
1372 17.
- 1373 Eckert AJ, Pande B, Ersoz ES, Wright MH, Rashbrook VK, Nicolet CM, Neale DB (2009) High-  
1374 throughput genotyping and mapping of single nucleotide polymorphisms in loblolly pine  
1375 (*Pinus taeda* L.). *Tree Genetics & Genomes* 5:225-234. doi: 10.1007/s11295-008-0183-8
- 1376 Eckert AJ, Wegrzyn JL, Cumbie WP, et al. (2012) Association genetics of the loblolly pine  
1377 (*Pinus taeda*, *Pinaceae*) metabolome. *New Phytologist* 193:890–902. doi: 10.1111/j.1469-  
1378 8137.2011.03976.x
- 1379 Eckert AJ, Wegrzyn JL, Liechty JD, et al. (2013b) The Evolutionary Genetics of the Genes  
1380 Underlying Phenotypic Associations for Loblolly Pine (*Pinus taeda*, *Pinaceae*). *Genetics*  
1381 195:1353–1372. doi: 10.1534/genetics.113.157198/-/DC1
- 1382 Ehret GB, Lamparter D, Hoggart CJ, Whittaker JC, Beckmann JS, Kutalik Z, Genetic  
1383 Investigation of Anthropometric Traits Consortium (2012) A multi-SNP locus-association  
1384 method reveals a substantial fraction of the missing heritability. *The American Journal of*  
1385 *Human Genetics*, 91, 863–871.
- 1386 Eyre-Walker A, Keightley PD (2007) The distribution of fitness effects of new mutations. *Nature*  
1387 *Reviews Genetics* 8:610–618. doi: 10.1038/nrg2146
- 1388 Evans, L. M., Kaluthota, S., Pearce, D. W., Allan, G. J., Floate, K., Rood, S. B., & Whitham, T.  
1389 G. (2016). Bud phenology and growth are subject to divergent selection across a latitudinal  
1390 gradient in *Populus angustifolia* and impact adaptation across the distributional range and  
1391 associated arthropods. *Ecology and evolution* 6:4565-4581. doi: 10.1002/ece3.2222
- 1392 Falconer DS (1989) *Introduction to quantitative genetics*, 3d ed. Longman, New York.
- 1393 Faltus FA (2014) Systems genetics: A paradigm to improve discovery of candidate genes and  
1394 mechanisms underlying complex traits. *Plant Science* 223: 45-48.  
1395 <http://dx.doi.org/10.1016/j.plantsci.2014.03.003>
- 1396 Feder JL, Egan SP, Nosil P (2012a) The genomics of speciation-with- gene-flow. *Trends in*  
1397 *Genetics* 28:342–350. doi: 10.1016/j.tig.2012.03.009
- 1398 Feder JL, Gejji R, Yeaman S, Nosil P (2012b) Establishment of new mutations under divergence  
1399 and genome hitchhiking. *Philosophical Transactions of the Royal Society B: Biological*  
1400 *Sciences* 367:461–474. doi: 10.1038/nature08480
- 1401 Feder JL, Nosil P (2010) The efficacy of divergence hitchhiking in generating genomic islands  
1402 during ecological speciation. *Evolution* 64:1729–1747. doi: 10.1111/j.1558-

- 1403 5646.2009.00943.x
- 1404 Feldman M, Lewontin R (1975) The heritability hang-up. *Science* 190:1163–1168. doi:  
1405 10.1126/science.1198102
- 1406 Felsenstein J (1976) The theoretical population genetics of variable selection and migration.  
1407 *Annu Rev Genet* 10:253–280.
- 1408 Fisher RA (1918) The correlation between relatives on the supposition of Mendelian inheritance.  
1409 *Transactions of the Royal Society of Edinburgh* 52:399–433.
- 1410 Fisher RA (1930) *The genetical theory of natural selection: a complete variorum edition*. Oxford  
1411 University Press
- 1412 Forester BR, Lasky JR, Wagner HH, Urban DL (2017) Using genotype-environment associations  
1413 to identify multilocus local adaptation. *bioRxiv* 1–24. doi: 10.1101/129460
- 1414 Franks SJ, Weber JJ, Aitken SN (2013) Evolutionary and plastic responses to climate change in  
1415 terrestrial plant populations. *Evolutionary Applications* 7:123–139. doi: 10.1111/eva.12112
- 1416 Friedline CJ, Lind BM, Hobson EM, et al. (2015) The genetic architecture of local adaptation I:  
1417 the genomic landscape of foxtail pine (*Pinus balfouriana* Grev. & Balf.) as revealed from a  
1418 high-density linkage map. *Tree Genetics & Genomes* 11:49. doi: 10.1007/s11295-015-0866-  
1419 x
- 1420 Gagnaire P-A, Gaggiotti OE (2016) Detecting polygenic selection in marine populations by  
1421 combining population genomics and quantitative genetics approaches. *Curr Zool* 62:603–  
1422 616. doi: 10.1093/cz/zow088
- 1423 Gazal S, Finucane HK, Furlotte NA, Loh P, Palamara PF, Liu X, Schoech A, Bulik-Sullivan B,  
1424 Neale BM, Gusev A, Price A (2017) Linkage disequilibrium-dependent architecture of  
1425 human complex traits shows action of negative selection. *Nat. Gen.* 1-7. doi:  
1426 10.1038/ng.3954
- 1427 Gibson G (2012) Rare and common variants: twenty arguments. *Nature Reviews Genetics*  
1428 13:135–145. doi: 10.1038/nrg3118
- 1429 Gilbert, K. J., & Whitlock, M. C. (2015).  $Q_{ST}$ – $F_{ST}$  comparisons with unbalanced half-sib designs.  
1430 *Molecular ecology resources* 15:262-267.
- 1431 Goddard ME, Wray NR, Verbyla K, Visscher PM (2009) Estimating effects and making  
1432 predictions from genome-wide marker data. *Statistical Science* 24:517-529.
- 1433 Gompert, Z., Egan, S. P., Barrett, R. D. H., Feder, J. L., & Nosil, P. (2016). Multilocus

- 1434 approaches for the measurement of selection on correlated genetic loci. *Molecular Ecology*,  
1435 1–18. <http://doi.org/10.1111/mec.13867>
- 1436 Gompert, Z., Jahner, J. P., Scholl, C. F., Wilson, J. S., Lucas, L. K., Soria-Carrasco, V., et al.  
1437 (2015). The evolution of novel host use is unlikely to be constrained by trade-offs or a lack  
1438 of genetic variation. *Molecular Ecology*, 24(11), 2777–2793.  
1439 <http://doi.org/10.1111/mec.13199>
- 1440 Goodnight CJ (1988) Epistasis and the effect of founder events on the additive genetic variance.  
1441 *Evolution* 42:441–454. doi: 10.2307/2409030
- 1442 Göring HHH, Terwilliger JD, Blangero J (2001) Large Upward Bias in Estimation of Locus-  
1443 Specific Effects from Genomewide Scans. *The American Journal of Human Genetics*  
1444 69:1357–1369. doi: 10.1086/324471
- 1445 Grandtner, M. M. (2005). *Elsevier's Dictionary of Trees: Volume 1: North America*. Elsevier.
- 1446 Grattapaglia D (2017) Status and perspectives of genomic selection in forest tree breeding. In  
1447 ME Sorrells, *Genomic Selection for Crop Improvement* (pp. 199-257). Cham, Switzerland:  
1448 Springer.
- 1449 Grattapaglia D, Resende MDV (2011) Genomic selection in forest tree breeding. *Tree Genetics*  
1450 *& Genomes* 7: 241-255.
- 1451 Grattapaglia D, Sederoff R (1994) Genetic linkage maps of *Eucalyptus grandis* and *Eucalyptus*  
1452 *urophylla* using a pseudo-test cross: mapping strategy and RAPD markers. *Genetics*  
1453 137:1121–1137
- 1454 Griswold CK (2015) Additive genetic variation and evolvability of a multivariate trait can be  
1455 increased by epistatic gene action. *J Theor Biol* 387:241–257. doi:  
1456 10.1016/j.jtbi.2015.09.023
- 1457 Guan, Y., & Stephens, M. (2011). Bayesian variable selection regression for genome-wide  
1458 association studies and other large-scale problems. *Annals of Eugenics*, 5(3), 1780–1815.  
1459 <http://doi.org/10.1214/11-AOAS455>
- 1460 Haldane JBS (1930) A mathematical theory of natural and artificial selection.(Part VI,  
1461 Isolation.). 26:220–230.
- 1462 Hall D, Hallingbäck HR, Wu HX (2016) Estimation of number and size of QTL effects in forest  
1463 tree traits. *Tree Genetics & Genomes* 1–17. doi: 10.1007/s11295-016-1073-0
- 1464 Hansen TF (2006) The Evolution of Genetic Architecture. *Annual Review of Ecology*,  
1465 *Evolution, and Systematics* 37:123–157. doi: 10.1146/annurev.ecolsys.37.091305.110224



- 1466 Hansen TF, Pelabon C, Houle D (2011) Heritability is not evolvability. *Evolutionary Biology*  
1467 38:258-277
- 1468 Hansen TF (2013) Why epistasis is important for selection and adaptation. *Evolution* 67:3501–  
1469 3511. doi: 10.1111/evo.12214
- 1470 Hansen TF (2003) Is modularity necessary for evolvability? *Biosystems* 69:83–94. doi:  
1471 10.1016/S0303-2647(02)00132-6
- 1472 Hansen TF, Wagner GP (2001) Modeling genetic architecture: a multilinear theory of gene  
1473 interaction. *Theoretical Population Biology* 59:61–86. doi: 10.1006/tpbi.2000.1508
- 1474 Heffner EL, Sorrells ME, Jannink JL (2009) Genomic selection for crop improvement. *Crop*  
1475 *Science* 49: 1–12.
- 1476 Hemani G, Knott S, Haley C (2013) An Evolutionary Perspective on Epistasis and the Missing  
1477 Heritability. *PLoS Genetics* 9:e1003295. doi: 10.1371/journal.pgen.1003295
- 1478 Henderson CR (1975) Best linear unbiased estimation and prediction under a selection model.  
1479 *Biometrics* 31:423-447.
- 1480 Hendry AP (2002)  $QST > = < FST$ ? *Trends in Ecology & Evolution* 17:502-502. doi:  
1481 [http://dx.doi.org/10.1016/S0169-5347\(02\)02603-4](http://dx.doi.org/10.1016/S0169-5347(02)02603-4)
- 1482 Hendry AP (2016) Key Questions on the Role of Phenotypic Plasticity in Eco-Evolutionary  
1483 Dynamics. *Journal of Heredity* 107:25–41. doi: 10.1093/jhered/esv060
- 1484 Hereford J (2009) A Quantitative Survey of Local Adaptation and Fitness Trade-Offs. *The*  
1485 *American Naturalist* 173:579–588. doi: 10.1086/597611
- 1486 Hermisson J (2009) Who believes in whole-genome scans for selection? *Heredity* 103:283–284.  
1487 doi: 10.1038/hdy.2009.101
- 1488 Hermisson J, Hansen TF, Wagner GP (2003) Epistasis in Polygenic Traits and the Evolution of  
1489 Genetic Architecture under Stabilizing Selection. *American Naturalist* 161:708–734. doi:  
1490 10.1086/374204
- 1491 Hermisson J, Pennings PS (2005) Soft sweeps: molecular population genetics of adaptation from  
1492 standing genetic variation. *Genetics* 169:2335–2352. doi: 10.1534/genetics.104.036947
- 1493 Hermisson J, Pennings PS (2017) Soft sweeps and beyond: understanding the patterns and  
1494 probabilities of selection footprints under rapid adaptation. *Methods in Ecology and*  
1495 *Evolution* 8:700–716. doi: 10.1111/2041-210X.12808

- 1496 Hill WG (2010) Understanding and using quantitative genetic variation. *Philosophical*  
1497 *Transactions of the Royal Society B* 365:73-85.
- 1498 Hill WG, Goddard ME, Visscher PM (2008) Data and Theory Point to Mainly Additive Genetic  
1499 Variance for Complex Traits. *PLoS Genetics* 4:e1000008–10. doi:  
1500 10.1371/journal.pgen.1000008
- 1501 Hirschhorn JN, Daly MJ (2005) Genome-wide association studies for common diseases and  
1502 complex traits. *Nature Reviews Genetics* 6:95-108.
- 1503 Hoban S, Kelley JL, Lotterhos KE, et al. (2016) Finding the Genomic Basis of Local Adaptation:  
1504 Pitfalls, Practical Solutions, and Future Directions. *The American Naturalist* 188:000–000.  
1505 doi: 10.1086/688018
- 1506 Hodgins KA, Yeaman S, Nurkowski KA, et al. (2016) Expression Divergence Is Correlated with  
1507 Sequence Evolution but Not Positive Selection in Conifers. *Molecular Biology and*  
1508 *Evolution* 33:1502–1516. doi: 10.1093/molbev/msw032
- 1509 Hoffmann AA, Rieseberg LH (2008) Revisiting the Impact of Inversions in Evolution: From  
1510 Population Genetic Markers to Drivers of Adaptive Shifts and Speciation? *Annual Review*  
1511 *of Ecology, Evolution, and Systematics* 39:21–42. doi:  
1512 10.1146/annurev.ecolsys.39.110707.173532
- 1513 Holliday JA, Aitken SN, Cooke JEK et al. (2017) Advances in ecological genomics in forest  
1514 trees and applications to genetic resources conservation and breeding. *Molecular Ecology*  
1515 26:706–717.
- 1516 Holliday, J. A., Wang, T., & Aitken, S. N. (2012). Predicting adaptive phenotypes from  
1517 multilocus genotypes in Sitka spruce (*Picea sitchensis*) using random forest. *G3: Genes,*  
1518 *Genomes, Genetics*. <http://doi.org/10.1534/g3.112.002733/-/DC1>
- 1519 Holliday JA, Zhou L, Bawa R, et al. (2016) Evidence for extensive parallelism but divergent  
1520 genomic architecture of adaptation along altitudinal and latitudinal gradients in *Populus*  
1521 *trichocarpa*. *New Phytologist* 209:1240-1251.
- 1522 Hornoy, B., Pavy, N., Gérardi, S., Beaulieu, J., & Bousquet, J. (2015). Genetic Adaptation to  
1523 Climate in White Spruce Involves Small to Moderate Allele Frequency Shifts in  
1524 Functionally Diverse Genes. *Genome Biology and Evolution*, 7(12), 3269–3285.  
1525 <http://doi.org/10.1093/gbe/evv218>
- 1526 Howe GT, Aitken SN, Neale DB, et al. (2003) From genotype to phenotype: unraveling the  
1527 complexities of cold adaptation in forest trees. *Can J Bot* 81:1247–1266. doi: 10.1139/b03-  
1528 141

- 1529 Huang W, Mackay TFC (2016) The Genetic Architecture of Quantitative Traits Cannot Be  
1530 Inferred from Variance Component Analysis. *PLoS Genetics* 12:e1006421–15. doi:  
1531 10.1371/journal.pgen.1006421
- 1532 Huber, C. D., Durvasula, A., Hancock, A. M., & Lohmueller, K. E. (2017). Gene expression  
1533 drives the evolution of dominance. *bioRxiv*, 182865. doi: <http://dx.doi.org/10.1101/182865>
- 1534 Ingvarsson PK, Hvidsten TR, Street NR (2016) Towards integration of population and  
1535 comparative genomics in forest trees. *New Phytologist* 212:338–344. doi:  
1536 10.1111/nph.14153
- 1537 Innan H, Kim Y (2004) Pattern of polymorphism after strong artificial selection in a  
1538 domestication event. *Proceedings of the National Academy of Sciences* 101:10667–10672.  
1539 doi: 10.1073/pnas.0401720101
- 1540 Isik F, Kumar S, Martínez-García PJ, et al. (2015) Acceleration of Forest and Fruit Tree  
1541 Domestication by Genomic Selection. *Advances in Botanical Research*. 74: 93-124. doi:  
1542 <http://dx.doi.org/10.1016/bs.abr.2015.05.002>
- 1543 Iwata et al. (2011) prospects for genomic selection in conifer breeding: a simulation study of  
1544 *Cryptomeria japonica*. *Tree Genetics & Genomes* 7: 747-758.
- 1545 Jain K, Stephan W (2015) Response of polygenic traits under stabilizing selection and mutation  
1546 when loci have unequal effects. *G3: Genes | Genomes | Genetics* 5:1065–1074. doi:  
1547 10.1534/g3.115.017970
- 1548 Jain K, Stephan W (2017) Rapid Adaptation of a Polygenic Trait After a Sudden Environmental  
1549 Shift. *Genetics* 206:389–406. doi: 10.1534/genetics.116.196972
- 1550 Jansen RC, Tesson BM, Fu J, et al. (2009) Defining gene and QTL networks. *Current Opinion in*  
1551 *Plant Biology* 12:241–246. doi: 10.1016/j.pbi.2009.01.003
- 1552 Jensen JD (2014) On the unfounded enthusiasm for soft selective sweeps. *Nature*  
1553 *Communications* 5:5281. doi: 10.1038/ncomms6281
- 1554 Jensen JD, Kim Y, DuMont VB, et al. (2005) Distinguishing between selective sweeps and  
1555 demography using DNA polymorphism data. *Genetics* 170:1401–1410. doi:  
1556 10.1534/genetics.104.038224
- 1557 Johnson RC, Nelson GW, Troyer JL, et al. (2010) Accounting for multiple comparisons in a  
1558 genome-wide association study (GWAS). *BMC Genomics* 11:724.
- 1559 Jones AG, Bürger R, Arnold SJ (2014) Epistasis and natural selection shape the mutational  
1560 architecture of complex traits. *Nature Communications* 5:1–10. doi: 10.1038/ncomms4709

- 1561 Joo JWJ, Hormozdiari F, Han B, Eskin E (2016) Multiple testing correction in linear mixed  
1562 models. *Genome Biology* 17:62.
- 1563 Josephs EB, Wright SI, et al. (2017a) The Relationship between Selection, Network  
1564 Connectivity, and Regulatory Variation within a Population of *Capsella grandiflora*.  
1565 *Genome Biology and Evolution* 9:1099–1109. doi: 10.1093/gbe/evx068
- 1566 Josephs EB, Lee YW, Stinchcombe JR, Wright SI (2015) Association mapping reveals the role  
1567 of purifying selection in the maintenance of genomic variation in gene expression.  
1568 *Proceedings of the National Academy of Sciences* 112:15390–15395. doi:  
1569 10.1073/pnas.1503027112
- 1570 Josephs EB, Stinchcombe JR, Wright SI (2017b) What can genome-wide association studies tell  
1571 us about the evolutionary forces maintaining genetic variation for quantitative traits? *New*  
1572 *Phytologist* 214:21–33. doi: 10.1111/nph.14410
- 1573 Kaplan NL, Hudson RR, Langley CH (1989) The “hitchhiking effect” revisited. *Genetics*  
1574 123:887–899.
- 1575 Kawecki TJ (2008) Adaptation to Marginal Habitats. *Annual Review of Ecology, Evolution, and*  
1576 *Systematics* 39:321–342. doi: 10.1146/annurev.ecolsys.38.091206.095622
- 1577 Kawecki TJ, Ebert D (2004) Conceptual issues in local adaptation. *Ecology Letters* 7:1225–  
1578 1241. doi: 10.1111/j.1461-0248.2004.00684.x
- 1579 Keightley PD, Eyre-Walker A (2010) What can we learn about the distribution of fitness effects  
1580 of new mutations from DNA sequence data? *Philos Trans R Soc Lond, B, Biol Sci*  
1581 365:1187–1193. doi: 10.1098/rstb.2009.0266
- 1582 Kempthorne O (1954) The Correlation between Relatives in a Random Mating Population.  
1583 *Proceedings of the Royal Society B: Biological Sciences* 143:103–113. doi:  
1584 10.1098/rspb.1954.0056
- 1585 Kimura M (1983) *The neutral theory of molecular evolution*. Cambridge University Press
- 1586 Kinloch Jr, B. B., Parks, G. K., & Fowler, C. W. (1970). White pine blister rust: simply inherited  
1587 resistance in sugar pine. *Science*, 193-195.
- 1588 Kirkpatrick M, Barton NH (1997) Evolution of a species' range. *The American Naturalist* 150:1–  
1589 23. doi: 10.1086/286054
- 1590 Kirkpatrick M, Barton NH (2006) Chromosome Inversions, Local Adaptation and Speciation.  
1591 *Genetics* 173:419–434. doi: 10.1534/genetics.105.047985

- 1592 Kopp M, Hermisson J (2009a) The Genetic Basis of Phenotypic Adaptation I: Fixation of  
1593 Beneficial Mutations in the Moving Optimum Model. *Genetics* 182:233–249. doi:  
1594 10.1534/genetics.108.099820
- 1595 Kopp M, Hermisson J (2009b) The genetic basis of phenotypic adaptation II: the distribution of  
1596 adaptive substitutions in the moving optimum model. *Genetics* 183:1453–1476. doi:  
1597 10.1534/genetics.109.106195
- 1598 Kopp M, Matuszewski S (2013) Rapid evolution of quantitative traits: theoretical perspectives.  
1599 *Evolutionary Applications* 7:169–191. doi: 10.1111/eva.12127
- 1600 Kremer A, Le Corre V (2012) Decoupling of differentiation between traits and their underlying  
1601 genes in response to divergent selection. *Heredity* 108:375–385. doi: 10.1038/hdy.2011.81
- 1602 Kremer A, Ronce O, Robledo-Arnuncio JJ, et al. (2012). Long-distance gene flow and adaptation  
1603 of forest trees to rapid climate change. *Ecology Letters* 15:378-392.
- 1604 Krutovsky KV, Neale DB (2005) Nucleotide diversity and linkage disequilibrium in cold-  
1605 hardiness- and wood quality-related candidate genes in Douglas fir. *Genetics* 171:2029–  
1606 2041. doi: 10.1534/genetics.105.044420
- 1607 Lamichhaney S, Berglund J, Almén MS, et al. (2015) Evolution of Darwin’s finches and their  
1608 beaks revealed by genome sequencing. *Nature* 518:371–375. doi: 10.1038/nature14181
- 1609 Lamy JB, Bouffier L, Burlett R, Plomion C, Cochard H, Delzon S (2011) Uniform selection as a  
1610 primary force reducing population genetic differentiation of cavitation resistance across a  
1611 species range. *PLoS One* 6:e23476.
- 1612 Lamy JB, Plomion C, Kremer A, Delzon S (2012) QST < FST as a signature of canalization.  
1613 *Molecular Ecology* 21:5646–5655.
- 1614 Lande R (1980) The genetic covariance between characters maintained by pleiotropic mutations.  
1615 *Genetics* 94:203–215.
- 1616 Lande R (2009) Adaptation to an extraordinary environment by evolution of phenotypic  
1617 plasticity and genetic assimilation. *Journal of Evolutionary Biology* 22:1435–1446. doi:  
1618 10.1111/j.1420-9101.2009.01754.x
- 1619 Lande R, Arnold S (1983) The measurement of selection on correlated characters. *Evolution*, 37,  
1620 1210–1226. doi: 10.1111/j.1558-5646.1983.tb00236.x
- 1621 Langlet O (1971) Two hundred years genecology. *Taxon* 20:653–721. doi: 10.2307/1218596
- 1622 Latta RG (1998) Differentiation of allelic frequencies at quantitative trait loci affecting locally

- 1623 adaptive traits. *The American Naturalist* 151:283–292. doi: 10.1086/286119
- 1624 Latta RG (2003) Gene flow, adaptive population divergence and comparative population  
1625 structure across loci. *New Phytologist* 161:51–58. doi: 10.1046/j.1469-8137.2003.00920.x
- 1626 Laurent S, Pfeifer SP, Settles ML, et al. (2016) The population genomics of rapid adaptation:  
1627 disentangling signatures of selection and demography in white sands lizards. *Molecular*  
1628 *Ecology* 25:306–323. doi: 10.1111/mec.13385
- 1629 Lauteri M, Pliura A, Monteverdi MC, Brugnoli E, Villani F, Eriksson G (2004) Genetic variation  
1630 in carbon isotope discrimination in six European populations of *Castanea sativa* Mill.  
1631 originating from contrasting localities. *Journal of evolutionary biology* 17:1286-1296.
- 1632 Le Corre V, Kremer A (2012) The genetic differentiation at quantitative trait loci under local  
1633 adaptation. *Molecular Ecology* 21:1548–1566. doi: 10.1111/j.1365-294X.2012.05479.x
- 1634 Le Rouzic A, Álvarez-Castro JM (2016) Epistasis-induced evolutionary plateaus in selection  
1635 responses. *American Naturalist* 188:E134–E150. doi: 10.1086/688893
- 1636 Leempoel, K., Duruz, S., Rochat, E., Widmer, I., Orozco-terWengel, P., & Joost, S. (2017).  
1637 Simple rules for an efficient use of Geographic Information Systems in molecular ecology.  
1638 *Frontiers in Ecology and Evolution* 5: 1-10.
- 1639 Legendre, P., & Legendre, L. F. (2012). *Numerical ecology* (Vol. 24). Elsevier.
- 1640 Leimu R, Fischer M (2008) A meta-analysis of local adaptation in plants. *PLoS ONE* 3:e4010.  
1641 doi: 10.1371/journal.pone.0004010.s001
- 1642 Leinonen T, McCairns RJS, O'Hara RB, Merilä J (2013) QST–FST comparisons: evolutionary  
1643 and ecological insights from genomic heterogeneity. *Nature Reviews Genetics* 14:179–190.  
1644 doi: 10.1038/nrg3395
- 1645 Leinonen PH, Sandring S, Quilot B, et al. (2009). Local adaptation in european populations of  
1646 *Arabidopsis lyrata* (Brassicaceae). *American Journal of Botany* 96:1129–1137.
- 1647 Leiserson M, Eldridge JV, Ramachandran S (2013) Network analysis of GWAS data. *Current*  
1648 *opinion in Genetics and Development* 23:602-610 doi: 10.1016/j.gde.2013.09.003
- 1649 Leitch AR, Leitch IJ (2012) Ecological and genetic factors linked to contrasting genome  
1650 dynamics in seed plants. *New Phytologist* 194:629-646. doi: 10.1111/j.1469-  
1651 8137.2012.04105.x.
- 1652 Lenormand T (2002) Gene flow and the limits to natural selection. *Trends in Ecology &*  
1653 *Evolution* 17:183–189. doi: 10.1016/S0169-5347(02)02497-7

- 1654 Lewontin RC, Krakauer J (1973) Distribution of gene frequency as a test of the theory of the  
1655 selective neutrality of polymorphisms.
- 1656 Li Y, Suontoma M, Burdon RD, Dungey HS (2017) Genotype by environment interactions in  
1657 forest tree breeding: review of methodology and perspectives on research and application.  
1658 *Tree Genetics & Genomes* 13:60. doi: 10.1007/s11295-017-1144-x
- 1659 Lind BM, Friedline CJ, Wegrzyn JL, et al. (2017) Water availability drives signatures of local  
1660 adaptation in whitebark pine (*Pinus albicaulis* Engelm.) across fine spatial scales of the  
1661 Lake Tahoe Basin, USA. *Molecular Ecology* 26:3168–3185 doi: 10.1111/mec.14106
- 1662 Loehle C (1988) Tree life history strategies: the role of defenses. *Canadian Journal of Forest*  
1663 *Research* 18: 209-222.
- 1664 Long AD, Langley CH (1999) The power of association studies to detect the contribution of  
1665 candidate genetic loci to variation in complex traits. *Genome Research* 9:720-731.
- 1666 Lopez GA, Potts BM, Vaillancourt RE, Apiolaza LA (2003). Maternal and carryover effects on  
1667 early growth of *Eucalyptus globulus*. *Canadian Journal of Forest Research*, 33(11), 2108–  
1668 2115. <http://doi.org/10.1139/X03-132>
- 1669 Liu J-J (2017) Profiling methyl jasmonate-responsive transcriptome for understanding induced  
1670 systemic resistance in whitebark pine (*Pinus albicaulis*). *Plant Mol Biol* 0:0–0. doi:  
1671 10.1007/s11103-017-0655-z&domain=pdf
- 1672 Liu J-J, Schoettle AW, Sniezko RA, et al. (2016) Genetic mapping of *Pinus flexilis* major gene  
1673 (Cr4) for resistance to white pine blister rust using transcriptome-based SNP genotyping.  
1674 *BMC Genomics* 17:1–12. doi: 10.1186/s12864-016-3079-2
- 1675 Lotterhos KE, Hodges K, Yeaman S, Degner J, Aitken S (2017) Modular environmental  
1676 pleiotropy of genes involved in local adaptation to climate despite physical linkage. *bioRxiv*  
1677 doi: <https://doi.org/10.1101/202481>
- 1678 Lotterhos KE, Whitlock MC (2014) Evaluation of demographic history and neutral  
1679 parameterization on the performance of  $F_{ST}$  outlier tests. *Molecular Ecology* 23:2178–2192.  
1680 doi: 10.1111/mec.12725
- 1681 Lotterhos KE, Whitlock MC (2015) The relative power of genome scans to detect local  
1682 adaptation depends on sampling design and statistical method. *Molecular Ecology* 24:1031–  
1683 1046.
- 1684 Lowry DB, Hoban S, Kelley JL, et al. (2016) Breaking RAD: an evaluation of the utility of  
1685 restriction site-associated DNA sequencing for genome scans of adaptation. *Molecular*  
1686 *Ecology Resources* 17:142–152. doi: 10.1111/1755-0998.12635

- 1687 Lowry DB, Hoban S, Kelley JL, et al. (2017) Responsible RAD: Striving for best practices in  
1688 population genomic studies of adaptation. *Molecular Ecology Resources* 17:366–369. doi:  
1689 10.1111/1755-0998.12677
- 1690 Lynch M, Walsh B (1998) *Genetics and analysis of quantitative traits*. Sinauer Sunderland, MA
- 1691 Mackay T (2001) The genetic architecture of quantitative traits. *Annual review of genetics*, **35**,  
1692 303–339.
- 1693 Mackay TFC (2014) Epistasis and quantitative traits: using model organisms to study gene-gene  
1694 interactions. *Nature Reviews Genetics* 15:22–33. doi: 10.1038/nrg3627
- 1695 Mackay TFC, Stone EA, Ayroles JF (2009) The genetics of quantitative traits: challenges and  
1696 prospects. *Nature Reviews Genetics* 10:565–577. doi: 10.1038/nrg2612
- 1697 MacPherson A, Hohenlohe PA, Nuismer SL (2015) Trait dimensionality explains widespread  
1698 variation in local adaptation. *Proc Biol Sci* 282:20141570–20141570. doi:  
1699 10.1098/rspb.2014.1570
- 1700 Mahalovich MF, Hipkins VD (2011) Molecular genetic variation in whitebark pine (*Pinus*  
1701 *albicaulis* Engelm.) in the Inland West. In: Keane, Robert E.; Tomback, Diana F.; Murray,  
1702 Michael P.; and Smith, Cyndi M., eds. 2011. The future of high-elevation, five-needle white  
1703 pines in Western North America: Proceedings of the High Five Symposium. 28-30 June  
1704 2010; Missoula, MT. Proceedings RMRS-P-63. Fort Collins, CO: U.S. Department of  
1705 Agriculture, Forest Service, Rocky Mountain Research Station. 376 p.
- 1706 Mähler N, Wang J, Terebieniec BK, et al. (2017) Gene co-expression network connectivity is an  
1707 important determinant of selective constraint. *PLoS Genetics* 13:e1006402–33. doi:  
1708 10.1371/journal.pgen.1006402
- 1709 Mahler DL, Weber MG, Wagner CE, Ingram T (2017) Pattern and Process in the Comparative  
1710 Study of Convergent Evolution. *American Naturalist* 190:S13–S28. doi: 10.1086/692648
- 1711 Mäki-Tanila A, Hill WG (2014) Influence of gene interaction on complex trait variation with  
1712 multilocus models. *Genetics* 198:355–367. doi: 10.1534/genetics.114.165282
- 1713 Martin G, Lenormand T (2006) A general multivariate extension of Fisher's geometrical model  
1714 and the distribution of mutation fitness effects across species. *Evolution* 60:893–16. doi:  
1715 10.1554/05-412.1
- 1716 Martin G, Lenormand T (2008) The distribution of beneficial and fixed mutation fitness effects  
1717 close to an optimum. *Genetics* 179:907–916. doi: 10.1534/genetics.108.087122
- 1718 Matuszewski S, Hermisson J, Kopp M (2015) Catch me if you can: Adaptation from standing



- 1719 genetic variation to a moving phenotypic optimum. *Genetics* 200:1255–1274. doi:  
1720 10.1534/genetics.115.178574/-/DC1
- 1721 Matuszewski S, Hermisson J, Kopp M (2014) Fisher's Geometric Model with a moving  
1722 optimum. *Evolution* 68:2571–2588. doi: 10.1111/evo.12465
- 1723 Mátyás C (1996) Climatic adaptation of trees: rediscovering provenance tests. *Euphytica* 92:45–  
1724 54.
- 1725 Maynard Smith JH, Haigh J (1974) The hitch-hiking effect of a favourable gene. *Genetical*  
1726 *Research* 23:23–35.
- 1727 McCandlish DM, Stoltzfus A (2014) Modeling evolution using the probability of fixation:  
1728 history and implications. *The Quarterly review of biology* 89:225–252. doi: 10.1086/677571
- 1729 McKay JK, Latta RG (2002) Adaptive population divergence: markers, QTL and traits. *Trends in*  
1730 *Ecology & Evolution* 17:285–291.
- 1731 McKinney GJ, Larson WA, Seeb LW, Seeb JE (2017) RADseq provides unprecedented insights  
1732 into molecular ecology and evolutionary genetics: comment on Breaking RAD by Lowry et  
1733 al. (2016). *Molecular Ecology Resources* 17:356–361. doi: 10.1111/1755-0998.12649
- 1734 Mei W, Stetter MG, Gates DJ, Stitzer MC, Ross-Ibarra J (2017) Adaptation in plant genomes:  
1735 bigger is different. *bioRxiv* <https://doi.org/10.1101/196501>
- 1736 Meier JI, Sousa VC, Marques DA, et al. (2016) Demographic modelling with whole-genome  
1737 data reveals parallel origin of similar *Pundamilia* cichlid species after hybridization.  
1738 *Molecular Ecology* 26:123–141. doi: 10.1111/mec.13838
- 1739 Messer PW, Petrov DA (2013) Population genomics of rapid adaptation by soft selective sweeps.  
1740 *Trends in Ecology & Evolution* 28:659–669. doi: 10.1016/j.tree.2013.08.003
- 1741 Meuwissen TH, Hayes BJ, Goddard ME. 2001. Prediction of total genetic value using genome-  
1742 wide dense marker maps. *Genetics* 157: 1819–1829.
- 1743 Mitton JB, Grant MC, Yoshino AM (1998) Variation in allozymes and stomatal size in pinyon  
1744 (*Pinus edulis*, Pinaceae), associated with soil moisture. *American Journal of Botany*  
1745 85:1262–1265.
- 1746 Mitton JB, Williams CG (2006) Gene Flow in Conifers. In: *Landscapes, Genomics, and*  
1747 *Transgenic Conifers.* (ed Williams CG), pp. 147–168. Springer Netherlands, Dordrecht.
- 1748 Mizrachi E, Verbeke L, Christie N, et al. (2017) Network-based integration of systems genetics  
1749 data reveals pathways associated with lignocellulosic biomass accumulation and processing.

- 1750 Proc Natl Acad Sci 114:1195–1200. doi: 10.1073/pnas.1620119114
- 1751 Moreno G (1994) Genetic architecture, genetic behavior, and character evolution. Annual review  
1752 of ecology and systematics 25:31–44.
- 1753 Morgenstern EK (1996) Geographic variation in forest trees: genetic basis and application of  
1754 knowledge in silviculture. UBC press.
- 1755 Morse AM, Peterson DG, Islam-Faridi MN, et al. (2009) Evolution of genome size and  
1756 complexity in *Pinus*. PLoS ONE 4:e4332.
- 1757 Moser G, Lee SH, Hayes BJ, Goddard ME, Wray NR, Visscher PM (2015) Simultaneous  
1758 discovery, estimation and prediction analysis of complex traits using a Bayesian mixture  
1759 model. PLoS Genetics, 11, e1004969.
- 1760 Namkoong G (1979) Introduction to Quantitative Genetics in Forestry. Technical Bulletin No.  
1761 1588. Washington, D. C. USDA Forest Service. 342 pp.
- 1762 Neale DB, Kremer A. (2011). Forest tree genomics: growing resources and applications. Nature  
1763 Reviews Genetics 12:111–122.
- 1764 Neale DB, Langley CH, Salzberg SL, Wegrzyn JL (2013) Open access to tree genomes: the path  
1765 to a better forest. Genome Biology 14:6 14:120. doi: 10.1186/gb-2013-14-6-120
- 1766 Neale DB, Martínez-García PJ, La Torre De AR, et al. (2017) Novel Insights into Tree Biology  
1767 and Genome Evolution as Revealed Through Genomics. Ann Rev of Plant Biol 68:457–483.  
1768 doi:10.1146/annurev-arplant-042916-041049
- 1769 Neale DB, Savolainen O (2004) Association genetics of complex traits in conifers. Trends in  
1770 Plant Science 9:325–330.
- 1771 Nelson RM, Pettersson ME, Carlborg Ö (2013) A century after Fisher: time for a new paradigm  
1772 in quantitative genetics. Trends in Genetics 29:669–676. doi: 10.1016/j.tig.2013.09.006
- 1773 Nilsson-Ehle H (1909) Kreuzungsuntersuchungen an Hafer und Weizen. Lunds Universitets  
1774 Arsskrift 5:1–122.
- 1775 Nystedt B, Street NR, Wetterbom A, et al. (2013) The Norway spruce genome sequence and  
1776 conifer genome evolution. Nature 497:570–584.
- 1777 Ohta T (1982) Linkage disequilibrium with the island model. Genetics 101:139–155.
- 1778 Ohta, T. 1992. The nearly neutral theory of molecular evolution. Annu. Rev. Ecol. Syst. 23:263-  
1779 286.

- 1780 Ohta, T. 1996. The current significance and standing of neutral and nearly neutral theories.  
1781 BioEssays 18: 673-684.
- 1782 Oldfield, S., Lusty, C., & MacKinven, A. (1998). The world list of threatened trees. World  
1783 Conservation Press.
- 1784 Orr HA (1998) The population genetics of adaptation: the distribution of factors fixed during  
1785 adaptive evolution. *Evolution* 52:935. doi: 10.2307/2411226
- 1786 Orr HA (2005) The genetic theory of adaptation: a brief history. *Nature Reviews Genetics*  
1787 6:119–127. doi: 10.1038/nrg1523
- 1788 Orr HA (2003) The Distribution of Fitness Effects Among Beneficial Mutations. *Genetics*  
1789 163:1519–1526. doi: 10.1101/SQB.1951.016.01.026
- 1790 Orr HA (2006) The distribution of fitness effects among beneficial mutations in Fisher's  
1791 geometric model of adaptation. *J Theor Biol* 238:279–285. doi: 10.1016/j.jtbi.2005.05.001
- 1792 Orr HA (2001) The “sizes” of mutations fixed in phenotypic evolution: a response to Clarke and  
1793 Arthur. *Evolution & Development* 3:121–123. doi: 10.1046/j.1525-142x.2001.003003121.x
- 1794 Orr HA (2000) Adaptation and the cost of complexity. *Evolution* 54:13–20. doi: 10.1111/j.0014-  
1795 3820.2000.tb00002.x
- 1796 Ortiz-Barrientos D, Engelstädter J, Rieseberg LH (2016) Recombination Rate Evolution and the  
1797 Origin of Species. *Trends in Ecology & Evolution* 31:226–236. doi:  
1798 10.1016/j.tree.2015.12.016
- 1799 Ovaskainen O, Karhunen M, Zheng CH, Cano Arias JM, Merilä J (2011) A new method to  
1800 uncover signatures of divergent and stabilizing selection in quantitative traits. *Genetics*  
1801 189:621–632.
- 1802 Paaby AB, Rockman MV (2013) The many faces of pleiotropy. *Trends in Genetics* 29:66–73.  
1803 doi: 10.1016/j.tig.2012.10.010
- 1804 Paixão T, Barton NH (2016) The effect of gene interactions on the long-term response to  
1805 selection. *Proc Natl Acad Sci USA* 113:4422–4427. doi: 10.1073/pnas.1518830113
- 1806 Palmé AE, Pyhajarvi T, Wachowiak W, Savolainen O (2009) Selection on Nuclear Genes in a  
1807 Pinus Phylogeny. *Molecular Biology and Evolution* 26:893–905. doi:  
1808 10.1093/molbev/msp010
- 1809 Parchman TL, Gompert Z, Mudge J, et al. (2012) Genome-wide association genetics of an  
1810 adaptive trait in lodgepole pine. *Molecular Ecology* 21:2991–3005. doi: 10.1111/j.1365-

- 1811 294X.2012.05513.x
- 1812 Parchman TL, Jahner JP, Uckele K, Galland LM (forthcoming) RADseq approaches and  
1813 applications for forest tree genetics.
- 1814 Pavlidis P, Metzler D, Stephan W (2012) Selective sweeps in multilocus models of quantitative  
1815 traits. *Genetics* 192:225–239. doi: 10.1534/genetics.112.142547
- 1816 Patterson HD, Thompson R (1971) Recovery of interblock information when block sizes are  
1817 unequal. *Biometrika* 58:545-554.
- 1818 Pennings PS, Hermisson J (2006a) Soft sweeps III: the signature of positive selection from  
1819 recurrent mutation. *PLoS Genetics* 2:e186. doi: 10.1371/journal.pgen
- 1820 Pennings PS, Hermisson J (2006b) Soft Sweeps II--Molecular Population Genetics of Adaptation  
1821 from Recurrent Mutation or Migration. *Molecular Biology and Evolution* 23:1076–1084.  
1822 doi: 10.1093/molbev/msj117
- 1823 Petit RJ, Hampe A (2006) Some evolutionary consequences of being a tree. *Annual review of*  
1824 *ecology* 37:187–214.
- 1825 Phillips PC (2008) Epistasis—the essential role of gene interactions in the structure and  
1826 evolution of genetic systems. *Nature Reviews Genetics* 9:855–867.
- 1827 Piepho HP, Möhring J, Melchinger AE, Büchse A (2008) BLUP for phenotypic selection in plant  
1828 breeding and variety testing. *Euphytica* 161:209-228.
- 1829 Pickrell JK, Berisa T, Liu JZ, Séguérel L (2016) Detection and interpretation of shared genetic  
1830 influences on 42 human traits. *Nature Genetics* 48:709–717. doi: 10.1038/ng.3570
- 1831 Platt A, Vilhjalmsón BJ, Nordborg M (2010) Conditions under which genome-wide association  
1832 studies will be positively misleading. *Genetics* 186:1045-1052.
- 1833 Plomion C, Bastien C, Bogeat-Triboulot M-B, et al. (2016) Forest tree genomics: 10  
1834 achievements from the past 10 years and future prospects. *Annals of Forest Science* 73:77–  
1835 103. doi: 10.1007/s13595-015-0488-3
- 1836 Postma FM, Ågren J (2016) Early life stages contribute strongly to local adaptation in  
1837 *Arabidopsis thaliana*. *Proceedings of the National Academy of Sciences* 113:7590–7595.  
1838 doi: 10.1073/pnas.1606303113
- 1839 Price AL, Patterson NJ, Plenge RM, Weinblatt ME, Shadick NA, Reich D (2006) Principal  
1840 components analysis corrects for stratification in genome-wide association studies. *Nature*  
1841 *Genetics* 38:904-909.

- 1842 Prout T, Barker JSF (1993) *F* statistics in *Drosophila buzzatii*: selection, population size and  
1843 inbreeding. *Genetics* **134**: 369–375.
- 1844 Prunier J, Laroche J, Beaulieu J, Bousquet J (2011) Scanning the genome for gene SNPs related  
1845 to climate adaptation and estimating selection at the molecular level in boreal black spruce.  
1846 *Molecular Ecology* 20:1702–1716. doi: 10.1111/j.1365-294X.2011.05045.x
- 1847 Prunier J, Verta J-P, MacKay JJ (2015) Conifer genomics and adaptation: at the crossroads of  
1848 genetic diversity and genome function. *New Phytologist* 209:44–62.
- 1849 Quesada, T., Li, Z., Dervinis, C., et al. (2008). Comparative analysis of the transcriptomes of  
1850 *Populus trichocarpa* and *Arabidopsis thaliana* suggests extensive evolution of gene  
1851 expression regulation in angiosperms. *New Phytologist* 180:408–420.
- 1852 Ralph P, Coop G (2010) Parallel adaptation: one or many waves of advance of an advantageous  
1853 allele? *Genetics* 186:647–668. doi: 10.1534/genetics.110.119594
- 1854 Rellstab C, Gugerli F, Eckert AJ, et al. (2015) A practical guide to environmental association  
1855 analysis in landscape genomics. *Molecular Ecology* 24:4348–4370. doi: 10.1111/mec.13322
- 1856 Remington DL (2015) Alleles versus mutations: Understanding the evolution of genetic  
1857 architecture requires a molecular perspective on allelic origins. *Evolution* 69:3025–3038.  
1858 doi: 10.1111/evo.12775
- 1859 Resende et al. (2012a) Accelerating the domestication of trees using genomic selection: accuracy  
1860 of prediction models across ages and environments. *New Phytologist* 193: 617-624.
- 1861 Resende et al. (2012b) Genomic selection for growth and wood quality in Eucalyptus: capturing  
1862 the missing heritability and accelerating breeding for complex traits in forest trees. *New*  
1863 *Phytologist* 194: 116-128.
- 1864 Resende et al. (2012c) Accuracy of genomic selection methods in a standard data set of loblolly  
1865 pine (*Pinus taeda* L.). *Genetics* 190: 1503-1510.
- 1866 Riesch R, Muschick M, Lindtke D, et al. (2017) Transitions between phases of genomic  
1867 differentiation during stick-insect speciation. *Nat ecol evol* 1:1–13. doi: 10.1038/s41559-  
1868 017-0082
- 1869 Ritland, K., Krutovsky, K.V., Tsumura, Y., Pelgas, B., Isabel, N. and Bousquet, J., 2011. Genetic  
1870 mapping in conifers. In: *Genetics, genomics and breeding of conifers*, pp.196-238.
- 1871 Ritland K, Ritland C (1996) Inferences about quantitative inheritance based on natural  
1872 population structure in the yellow monkeyflower, *Mimulus guttatus*. *Evolution* 50:1074-  
1873 1082.

- 1874 Rockman, M. V. (2012, January). The QTN program and the alleles that matter for evolution: All  
1875 that's gold does not glitter. *Evolution* 66:1-17.
- 1876 Rodríguez-Quilón I, Santos-del-Blanco L, Serra-Varela MJ, Koskela J, González-Martínez SC,  
1877 Alía R (2016) Capturing neutral and adaptive genetic diversity for conservation in a highly  
1878 structured tree species. *Ecological Applications* 26:2254-2266. doi:
- 1879 Romero IG, Ruvinsky I, Gilad Y (2012) Comparative studies of gene expression and the  
1880 evolution of gene regulation. *Nature Publishing Group* 13:505–516. doi: 10.1038/nrg3229
- 1881 Roschanski AM, Csilléry K, Liepelt S et al. (2016) Evidence of divergent selection at landscape  
1882 and local scales in *Abies alba* Mill. in the French Mediterranean Alps. *Molecular Ecology*  
1883 25:776-794.
- 1884 Savolainen O, Lascoux M, Merilä J (2013) Ecological genomics of local adaptation. *Nature*  
1885 *Reviews Genetics* 14:807–820. doi: 10.1038/nrg3522
- 1886 Savolainen O, Pyhäjärvi T, Knürr T (2007) Gene Flow and Local Adaptation in Trees. *Annual*  
1887 *Review of Ecology, Evolution, and Systematics* 38:595–619. doi:  
1888 10.1146/annurev.ecolsys.38.091206.095646
- 1889 Schoville SD, Bonin A, Francois O, et al. (2012) Adaptive Genetic Variation on the Landscape:  
1890 Methods and Cases. *Annual Review of Ecology, Evolution, and Systematics* 43:23–43. doi:  
1891 10.1146/annurev-ecolsys-110411-160248
- 1892 Schrider DR, Kern AD (2016) S/HIC: Robust Identification of Soft and Hard Sweeps Using  
1893 Machine Learning. *PLoS Genetics* 12:e1005928–31. doi: 10.1371/journal.pgen.1005928
- 1894 Schrider DR, Mendes FK, Hahn MW, Kern AD (2015) Soft shoulders ahead: spurious signatures  
1895 of soft and partial selective sweeps result from linked hard sweeps. *Genetics* 200:267–284.  
1896 doi: 10.1534/genetics.115.174912/-/DC1
- 1897 Schrider DR, Shanku AG, Kern AD (2016) Effects of linked selective sweeps on demographic  
1898 inference and model selection. *Genetics* 204:1207–1223. doi:  
1899 10.1534/genetics.116.190223/-/DC1
- 1900 Searle SR, Casella G, McCulloch CE (1992) *Variance Components*. New York, NY: John Wiley  
1901 & Sons, Inc. 528 pp.
- 1902 Silva-Junior O, Faria DA, Grattapaglia D (2015) A flexible multi-species genome-wide 60K  
1903 SNP chip developed from pooled resequencing of 240 Eucalyptus tree genomes across 12  
1904 species. *New Phytologist* 206:1527-1540. doi: 10.1111/nph.13322
- 1905 Simons YB, Bullaughey K, Hudson RR, Sella G (2017) A model for the genetic architecture of

- 1906 quantitative traits under stabilizing selection. bioRxiv 1–76. doi: arXiv:1704.06707
- 1907 Siol M, Wright S, Barrett S (2010) The population genomics of plant adaptation. New  
1908 Phytologist 188: 313-332.
- 1909 Slate J (2005) Quantitative trait locus mapping in natural populations: progress, caveats and  
1910 future directions. Molecular Ecology 14:363–379. doi: 10.1111/j.1365-294X.2004.02378.x
- 1911 Slatkin M (1987) Gene flow and the geographic structure of natural populations. Science  
1912 236:787–793. doi: 10.1126/science.3576198
- 1913 Slatkin M (1975) Gene flow and selection in a two-locus system. Genetics 81:787–802.
- 1914 Smith SD (2016) Pleiotropy and the evolution of floral integration. New Phytologist 209:80–85.  
1915 doi: 10.1111/nph.13583
- 1916 Sork VL, Aitken SN, Dyer RJ, et al. (2013) Putting the landscape into the genomics of trees:  
1917 approaches for understanding local adaptation and population responses to changing  
1918 climate. Tree Genetics & Genomes 9:901–911. doi: 10.1007/s11295-013-0596-x
- 1919 Speed, D., & Balding, D. J. (2014). MultiBLUP: improved SNP-based prediction for complex  
1920 traits. Genome Research, 24(9), 1550–1557. <http://doi.org/10.1101/gr.169375.113>
- 1921 Spitze K (1993) Population structure in *Daphnia obtusa*: quantitative genetic and allozyme  
1922 variation. Genetics 135:367-374.
- 1923 Spencer CCA, Su Z, Donnelly P, Marchini J (2009) Designing genome-wide association studies:  
1924 sample size, power, imputation, and the choice of genotyping chip. PLoS Genetics  
1925 5:e1000477.
- 1926 St Clair JB, Mandel NL, Vance-Borland KW (2005) Genecology of Douglas fir in western  
1927 Oregon and Washington. Annals of Botany 96:1199–1214.
- 1928 Stephan, W. (2010) Genetic hitchhiking versus background selection: the controversy and its  
1929 implications. Philos Trans R Soc Lond B Biol Sci 365: 1245-1253.
- 1930 Stephan W (2015) Signatures of positive selection: from selective sweeps at individual loci to  
1931 subtle allele frequency changes in polygenic adaptation. Molecular Ecology 25:79–88. doi:  
1932 10.1111/mec.13288
- 1933 Stephens M, Balding DJ (2009) Bayesian statistical methods for genetic association studies.  
1934 Nature Reviews Genetics 10:681-690.
- 1935 Stinchcombe JR, Hoekstra HE (2008) Combining population genomics and quantitative genetics:  
1936 finding the genes underlying ecologically important traits. Heredity 100:158–170. doi:

- 1937 10.1038/sj.hdy.6800937
- 1938 Stölting KN, Paris M, Meier C, Heinze B, Castiglione S, Bartha D, Lexer C (2015) Genome-  
1939 wide patterns of differentiation and spatially varying selection between postglacial  
1940 recolonization lineage of *Populus alba* (Salicaceae), a widespread forest tree. *New*  
1941 *Phytologist* 207:723-734. doi: 10.1111/nph.13392
- 1942 Storey JD, Tibshirani R (2003) Statistical significance for genomewide studies. *Proceedings of*  
1943 *the National Academy of Sciences of the United States of America* 100:9440-9445.
- 1944 Strickler SR, Bombarely A, Mueller LA (2012) Designing a transcriptome next-generation  
1945 sequencing project for a nonmodel plant species I. *American Journal of Botany* 99:257-266.  
1946 doi: 10.3732/ajb.1100292
- 1947 Suren H, Hodgins KA, Yeaman S, Nurkowski KA, Smets P, Rieseberg LH, Aitken SN, Holliday  
1948 JA (2016) Exome capture from the spruce and pine giga-genomes. *Molecular Ecology*  
1949 16:1136-1146.
- 1950 Tan, B., Grattapaglia, D., Wu, H. X., & Ingvarsson, P. K. (2017). Genomic prediction reveals  
1951 significant non-additive effects for growth in hybrid Eucalyptus. *bioRxiv*, 1-35.  
1952 <http://doi.org/10.1101/178160>
- 1953 Temesgen B, Brown GR, Harry DE, Kinlaw CS, Sewell MM, Neale DB (2001) Genetic mapping  
1954 of expressed sequence tag polymorphism (ESTP) markers in loblolly pine (*Pinus taeda* L.).  
1955 *Theor Appl Genet* 102:664-675
- 1956 Tenaillon O (2014) The Utility of Fisher's Geometric Model in Evolutionary Genetics. *Annual*  
1957 *Review of Ecology, Evolution, and Systematics* 45:179-201. doi: 10.1146/annurev-ecolsys-  
1958 120213-091846
- 1959 Thavamanikumar S, Southerton SG, Bossinger G, Thumma BR (2013) Dissection of complex  
1960 traits in forest trees — opportunities for marker-assisted selection. *Tree Genetics &*  
1961 *Genomes* 9:627-639. doi: 10.1007/s11295-013-0594-z
- 1962 Tiffin P, Ross-Ibarra J (2014) Advances and limits of using population genetics to understand  
1963 local adaptation. *Trends in Ecology & Evolution* 29:673-680. doi:  
1964 10.1016/j.tree.2014.10.004
- 1965 Tigano A, Friesen VL (2016) Genomics of local adaptation with gene flow. *Molecular Ecology*  
1966 25:2144-2164. doi: 10.1111/mec.13606
- 1967 Timpson NJ, Greenwood CMT, Soranzo N, et al. (2017) Genetic architecture: the shape of the  
1968 genetic contribution to human traits and disease. *Nature Publishing Group* 1-15. doi:



- 1969 10.1038/nrg.2017.101
- 1970 Turelli M, Barton NH (1994) Genetic and statistical analyses of strong selection on polygenic  
1971 traits: what, me normal? *Genetics* 138:913–941.
- 1972 Vasquez-Gross, H. A., Yu, J. J., Figueroa, B., Gessler, D. D., Neale, D. B., & Wegrzyn, J. L.  
1973 (2013). CartograTree: connecting tree genomes, phenotypes and environment. *Molecular*  
1974 *Ecology Resources* 13: 528-537.
- 1975 Via S, Lande R (1985) Genotype-environment interaction and the evolution of phenotypic  
1976 plasticity. *Evolution* 39:505–522. doi: 10.1111/j.1558-5646.1985.tb00391.x
- 1977 Vialette-Guiraud ACM, Andres-Robin A, Chambrier P, et al. (2016) The analysis of Gene  
1978 Regulatory Networks in plant evo-devo. *Journal of Experimental Botany* 67:2549–2563.  
1979 doi: 10.1093/jxb/erw119
- 1980 Vitezica ZG, Legarra A, Toro MA, Varona L (2017) Orthogonal Estimates of Variances for  
1981 Additive, Dominance, and Epistatic Effects in Populations. *Genetics* 206:1297–1307. doi:  
1982 10.1534/genetics.116.199406
- 1983 Vizcaíno-Palomar N, Revuelta-Eugercios B, Zavala MA, Alia R, González-Martínez SC (2014)  
1984 The role of population origin and microenvironment in seedling emergence and early  
1985 survival in Mediterranean maritime pine (*Pinus pinaster* Aiton). *PLoS ONE* 9:e109132.
- 1986 Wachowiak W, Trivedi U, Perry A, Cavers S (2015) Comparative transcriptomics of a complex  
1987 of four European pine species. *BMC Genomics* 16:1–9. doi: 10.1186/s12864-015-1401-z
- 1988 Wadgyman SM, Lowry DB, Gould BA, et al. (2017) Identifying targets and agents of selection:  
1989 innovative methods to evaluate the processes that contribute to local adaptation. *Methods in*  
1990 *Ecology and Evolution* 8:738–749. doi: 10.1111/2041-210X.12777
- 1991 Wagner GP, Altenberg L (1996) Perspective: complex adaptations and the evolution of  
1992 evolvability. *Evolution* 50:967. doi: 10.2307/2410639
- 1993 Wagner GP, Kenney-Hunt JP, Pavlicev M, et al. (2008) Pleiotropic scaling of gene effects and  
1994 the “cost of complexity.” *Nature* 452:470–472. doi: 10.1038/nature06756
- 1995 Wagner GP, Pavlicev M, Cheverud JM (2007) The road to modularity. *Nature Reviews Genetics*  
1996 8:921–931. doi: 10.1038/nrg2267
- 1997 Wagner GP, Zhang J (2011) The pleiotropic structure of the genotype–phenotype map: the  
1998 evolvability of complex organisms. *Nature Publishing Group* 12:204–213. doi:  
1999 10.1038/nrg2949
- 2000 Wang L, Beissinger TM, Lorant A, Ross-Ibarra C, Ross-Ibarra J, Hufford M (2017) The

- 2001 interplay of demography and selection during maize domestication and expansion. bioRxiv  
2002 doi: <https://doi.org/10.1101/114579>
- 2003 Wang Z, Liao BY, Zhang J (2010) Genomic patterns of pleiotropy and the evolution of  
2004 complexity. *Proceedings of the National Academy of Science* 107:18034–18039. doi:  
2005 10.1073/pnas.1004666107
- 2006 Wegrzyn JL, Lee JM, Tarse BR, Neale DB (2008) TreeGenes: A Forest Tree Genome  
2007 Database. *International Journal of Plant Genomics* 2008:1–7. doi: 10.1155/2008/412875
- 2008 Wegrzyn JL, Main D, Figueroa B, et al. (2012) Uniform standards for genome databases in  
2009 forest and fruit trees. *Tree Genetics & Genomes* 8:549–557. doi: 10.1007/s11295-012-0494-  
2010 7
- 2011 Welch JJ, Waxman D (2003) Modularity and the cost of complexity. *Evolution* 57:1723–13. doi:  
2012 10.1554/02-673
- 2013 Wellenreuther M, Hansson B (2016) Detecting Polygenic Evolution: Problems, Pitfalls,  
2014 and Promises. *Trends in Genetics* 32:155–164. doi: 10.1016/j.tig.2015.12.004
- 2015 Whitlock MC (1999) Neutral additive genetic variance in a metapopulation. *Genetical Research*  
2016 74:215–221.
- 2017 Whitlock MC (2003) Fixation probability and time in subdivided populations. *Genetics* 164:767–  
2018 779.
- 2019 Whitlock MC, Gilbert KJ (2012)  $Q_{ST}$  in a hierarchically structured population. *Molecular*  
2020 *Ecology Resources* 12:481–483.
- 2021 Whitlock, M. C. and F. Guillaume. 2009. Testing for spatially divergent selection: Comparing  
2022  $Q_{ST}$  to  $F_{ST}$ . *Genetics* 183: 1055-1063.
- 2023 Whitlock MC, Lotterhos KE (2015) Reliable detection of loci responsible for local adaptation:  
2024 Inference of a null model through trimming the distribution of  $F_{ST}$ . *The American Naturalist*  
2025 186:S24–S36. doi: 10.1086/682949
- 2026 Whitlock MC, Phillips PC, Moore FB (1995) Multiple fitness peaks and epistasis. *Annual*  
2027 *Review of Ecology and Systematics* 26:601–629. doi: annurev.es.26.110195.003125
- 2028 Wong CK, Bernardo R (2008) Genomewide selection in oil palm: increasing selection gain per  
2029 unit time and cost with small populations. *Theor Appl Genet* 116: 815–824.
- 2030 Wortley, A. H., & Scotland, R. W. (2004). Synonymy, sampling and seed plant numbers. *Taxon*,  
2031 53(2), 478-480.

- 2032 Wright S (1932) The roles of mutation, inbreeding, crossbreeding, and selection in evolution.  
2033 Proceedings of the Sixth International Congress on Genetics, Vol. 1, No. 6. (1932), pp. 356-  
2034 366.
- 2035 Wright S (1931) Evolution in Mendelian populations. *Genetics* 16:97–159.
- 2036 Xu S (2003) Theoretical Basis of the Beavis Effect. *Genetics* 165:2259–2268. doi:  
2037 10.1038/hdy.1992.131
- 2038 Yang J, Benyamin B, McEvoy BP, et al. (2010) Common SNPs explain a large proportion of the  
2039 heritability for human height. *Nature Genetics* 42:565–569. doi: 10.1038/ng.608
- 2040 Yang, J., S. Mezmouk, A. Baumgarten, E. S. Buckler, K. E. Guill, M. D. McMullen, and J. Ross-  
2041 Ibarra. 2017. Incomplete dominance of deleterious alleles contribute substantially to trait  
2042 variation and heterosis in maize. *bioRxiv*. Doi: <https://doi.org/10.1101/086132>
- 2043 Yeaman S (2013) Genomic rearrangements and the evolution of clusters of locally adaptive loci.  
2044 Proceedings of the National Academy of Sciences 110:E1743–51. doi:  
2045 10.1073/pnas.1219381110
- 2046 Yeaman S (2015) Local Adaptation by Alleles of Small Effect. *The American Naturalist*  
2047 186:S74–S89. doi: 10.1086/682405
- 2048 Yeaman S, Hodgins KA, Lotterhos KE, et al. (2016) Convergent local adaptation to climate in  
2049 distantly related conifers. *Science* 353:1431–1433. doi: 10.1126/science.aaf7812
- 2050 Yeaman S, Jarvis A (2006) Regional heterogeneity and gene flow maintain variance in a  
2051 quantitative trait within populations of lodgepole pine. *Proceedings of the Royal Society B:*  
2052 *Biological Sciences* 273:1587–1593. doi: 10.1534/genetics.166.2.1053
- 2053 Yeaman S, Otto SP (2011) Establishment and maintenance of adaptive genetic divergence under  
2054 migration, selection, and drift. *Evolution* 65:2123–2129. doi: 10.1111/j.1558-  
2055 5646.2011.01277.x
- 2056 Yeaman S, Whitlock MC (2011) The genetic architecture of adaptation under migration-  
2057 selection balance. *Evolution* 65:1897–1911. doi: 10.1111/j.1558-5646.2011.01269.x
- 2058 Yoder JB, Tiffin P (2017) Effects of Gene Action, Marker Density, and Timing of Selection on  
2059 the Performance of Landscape Genomic Scans of Local Adaptation. *Journal of Heredity* 1–  
2060 13. doi: 10.1093/jhered/esx042
- 2061 Yu J, Pressoir G, Briggs WH, Vroh Bi I, Yamasaki M et al. (2005) A unified mixed-model  
2062 method for association mapping that accounts for multiple levels of relatedness. *Nature*  
2063 *Genetics* 38:203-208.

- 2064 Zhang X-S (2012) Fisher's geometric model of fitness landscape and variance in fitness within a  
2065 changing environment. *Evolution* 66:2350–2368. doi: 10.1111/j.1558-5646.2012.01610.x
- 2066 Zhang M, Zhou L, Bawa R, Suren H, Holliday JA (2016) Recombination rate variation,  
2067 hitchhiking, and demographic history shape deleterious load in poplar. *Molecular Biology*  
2068 *and Evolution*. 33:2899-2910. doi: <https://doi.org/10.1093/molbev/msw169>
- 2069 Zhong S, Dekkers JC, Fernando RL, Jannink JL (2009) Factors affecting accuracy from genomic  
2070 selection in populations derived from multiple inbred lines: a barley case study. *Genetics*  
2071 182: 355–364.
- 2072 Zhou, X., Carbonetto, P., & Stephens, M. (2013). Polygenic modeling with Bayesian sparse  
2073 linear mixed models. *PLoS Genetics*, 9(2), e1003264.  
2074 <http://doi.org/10.1371/journal.pgen.1003264>
- 2075 Zinkgraf M, Liu L, Groover A, Filkov V (2017) Identifying gene coexpression networks  
2076 underlying the dynamic regulation of wood-forming tissues in *Populus* under diverse  
2077 environmental conditions. *New Phytologist* 214:1464–1478. doi: 10.1111/nph.14492
- 2078 Zöllner S, Pritchard JK (2007) Overcoming the Winner's Curse: Estimating Penetrance  
2079 Parameters from Case-Control Data. *The American Journal of Human Genetics* 80:605–615.  
2080 doi: 10.1086/512821
- 2081 Zuk O, Hechter E, Sunyaev SR (2012) The mystery of missing heritability: Genetic interactions  
2082 create phantom heritability. *Proceedings of the National Academy of Science* 109:1193–1198.  
2083 doi: 10.1073/pnas.1119675109/-/DCSupplemental

2084 **Author Contributions**

2085 BML and AJE conceived the review, with contributions from MM, CEB, and TMF. BML, MM,  
2086 CEB, and TMF contributed to the literature search and survey which was analyzed by BML.  
2087 CEB summarized  $Q_{ST}$  and  $F_{ST}$  comparisons. BML wrote the manuscript with contributions from  
2088 MM and AJE. All authors contributed to the editing of the manuscript.

2089 **Figures**  
2090 **Figure 1**

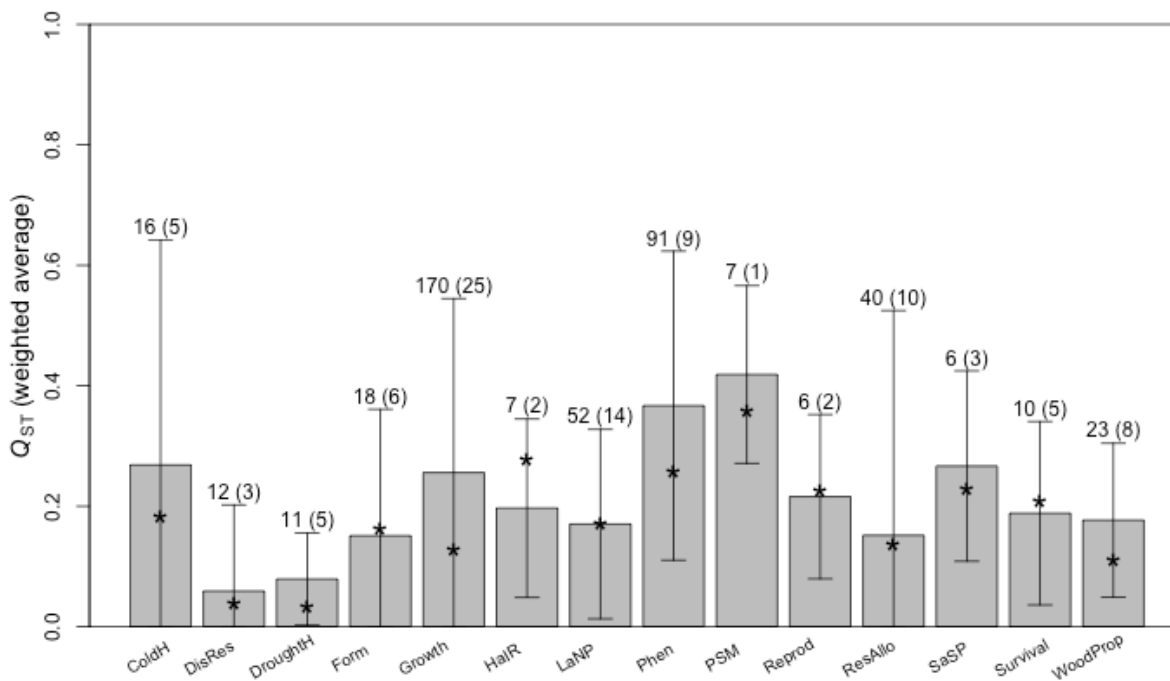

2091 **Figure 1.** Average  $Q_{ST}$  for each of 14 trait categories from literature review calculated by  
2092 weighting each estimate by the number of families used in the estimation. Error bars represent  
2093 the standard deviation of the weighted averages. Numbers above error bars represent total  
2094 number of estimates, with total number of unique species in parentheses. Asterisks indicate  
2095 median values of the unweighted  $Q_{ST}$  distribution. ColdH = cold hardiness, DisRes = disease  
2096 resistance, DroughtH = drought hardiness, HaIR = herbivore and insect resistance, LaNP = leaf  
2097 and needle properties, Phen = phenology, PSM = plant secondary metabolites, Reprod =  
2098 reproduction, ResAllo = resource allocation, SaSP = seed and seedling properties, WoodProp =  
2099 wood properties.  
2100

2101 **Figure 2**

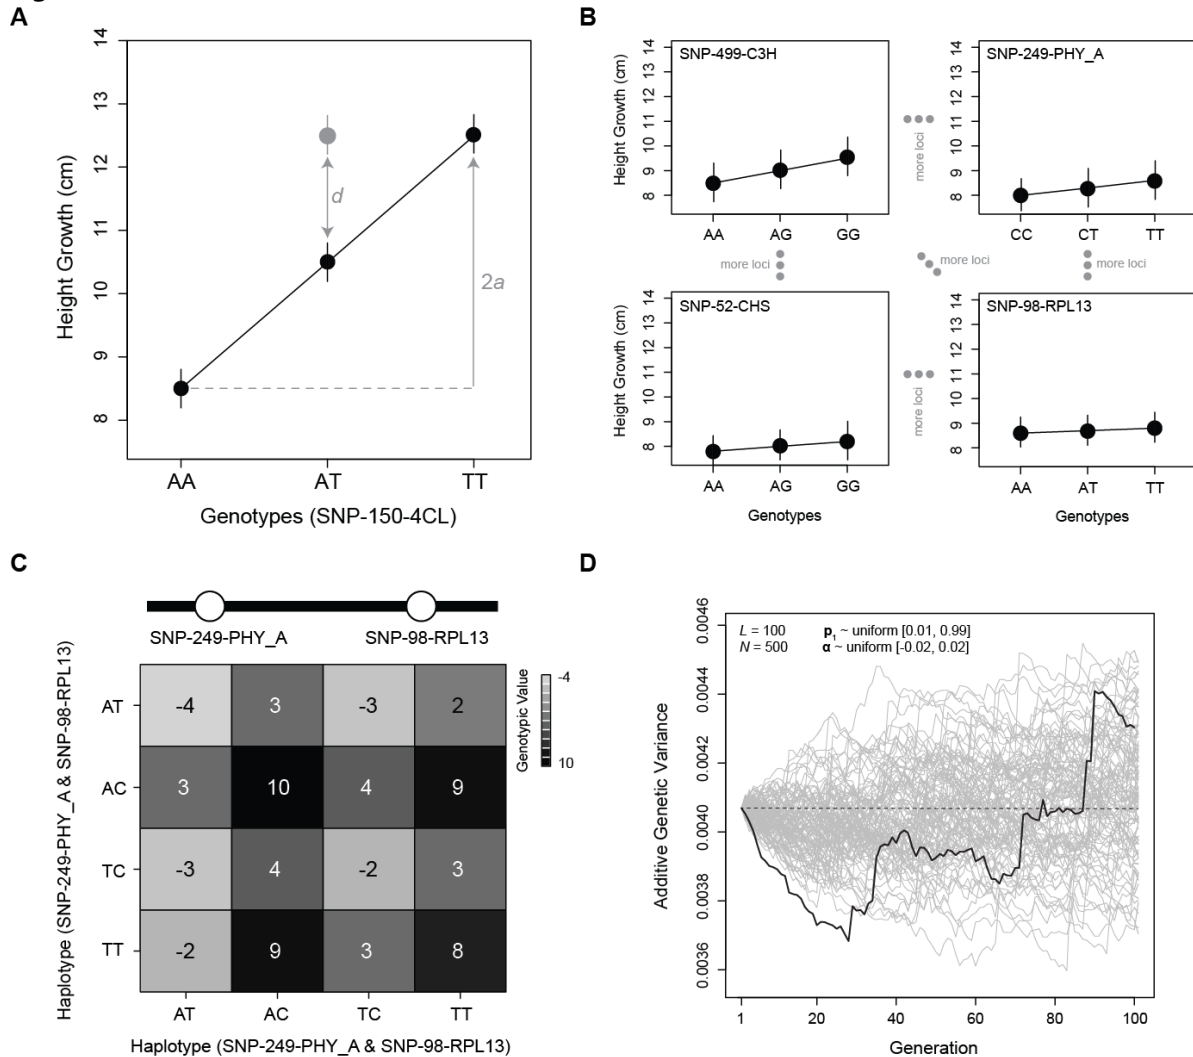

2102 **Figure 2.** Relevant quantitative genetic concepts are needed to understand the evolution of  
 2103 polygenic traits. (A) Additive and non-additive effects at a single locus, where  $a$  is defined as the  
 2104 additive effect (also known as the average effect of allelic substitution [ $\alpha$ ] when there is no  
 2105 dominance) and  $d$  is defined as the dominance deviation. With dominance,  $\alpha = a[1 + k(p - q)]$ , where  
 2106  $k$  is the degree of dominance ( $k = 0$ : additive,  $k = 1$ : dominance,  $k > 1$ : over-dominance, see Lynch &  
 2107 Walsh 1998). (B) Polygenic traits are determined by multiple genes, each with additive (shown) and  
 2108 non-additive (not shown) effects. The total additive effect is the sum of the additive effects at all  
 2109 causative loci. (C) Additive-by-additive epistasis, where the additive effect of an allele at the PHY\_A  
 2110 SNP depends on what allele it is paired with at the RPL13 SNP. In this case, the effects can be  
 2111 thought of as dependent in the following manner using the four possible haplotypes at the PHY\_A  
 2112 (A/T SNP) and RPL13 (C/T SNP) SNPs – AC: +5, AT: -2, TC: -1, TT: 4. (D) The effect of genetic drift  
 2113 on the additive genetic variance as determined by 100 independent, causative loci. Each line  
 2114 represents a simulation of genetic drift in a constant sized population ( $n = 500$  diploids) conditioned  
 2115 on initial allele frequencies across loci ( $p_i$ ) and effect sizes ( $\alpha$ ). The expected mean across all 100  
 2116 simulations is given by the dashed black line. Any given simulation can deviate strongly from this  
 2117 expectation (solid black line). Thus, when the elements of  $p$  change over time, in this case due to  
 2118 genetic drift, so does the additive genetic variance. See also Supplemental Box S1.  
 2119

2120 **Figure 3A**

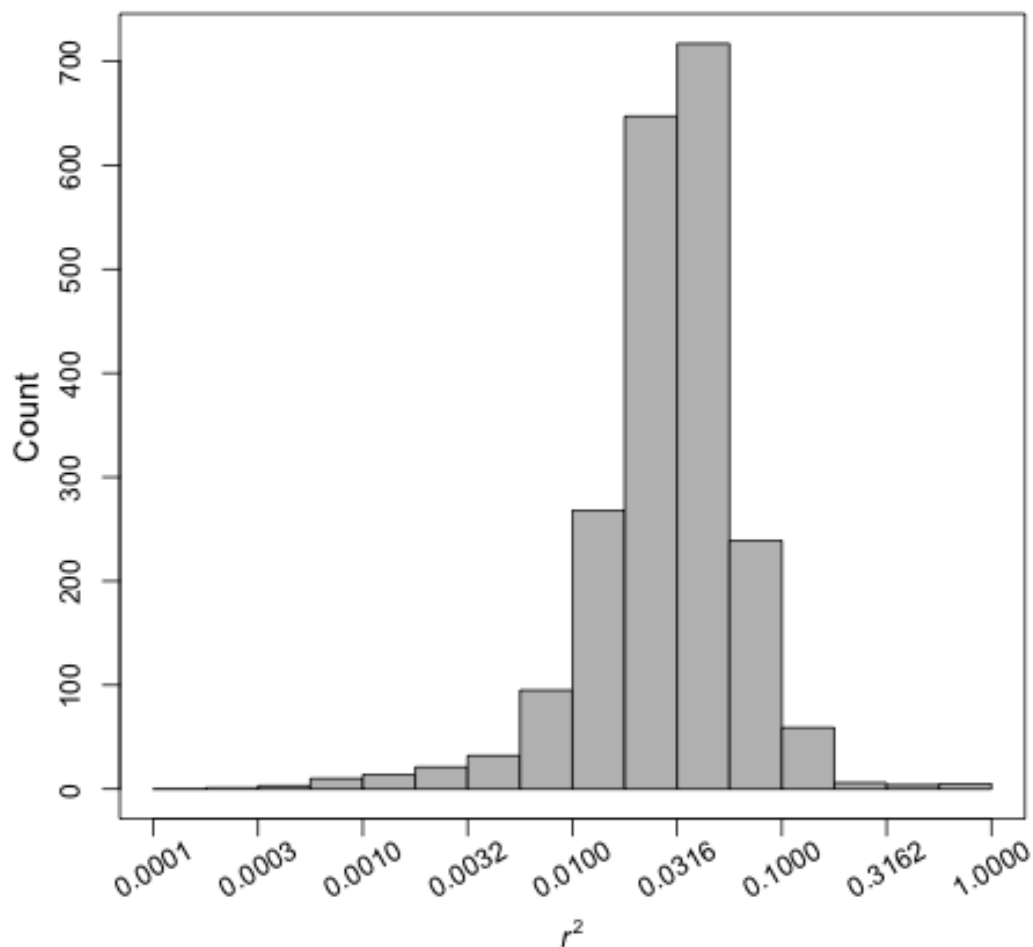

2121  
2122 **Figure 3A.** Counts of per-locus percent variance explained ( $r^2$ ) estimates from single-locus  
2123 genotype-phenotype associations from literature review. Note logarithmic x-axis.



2124 **Figure 3B**

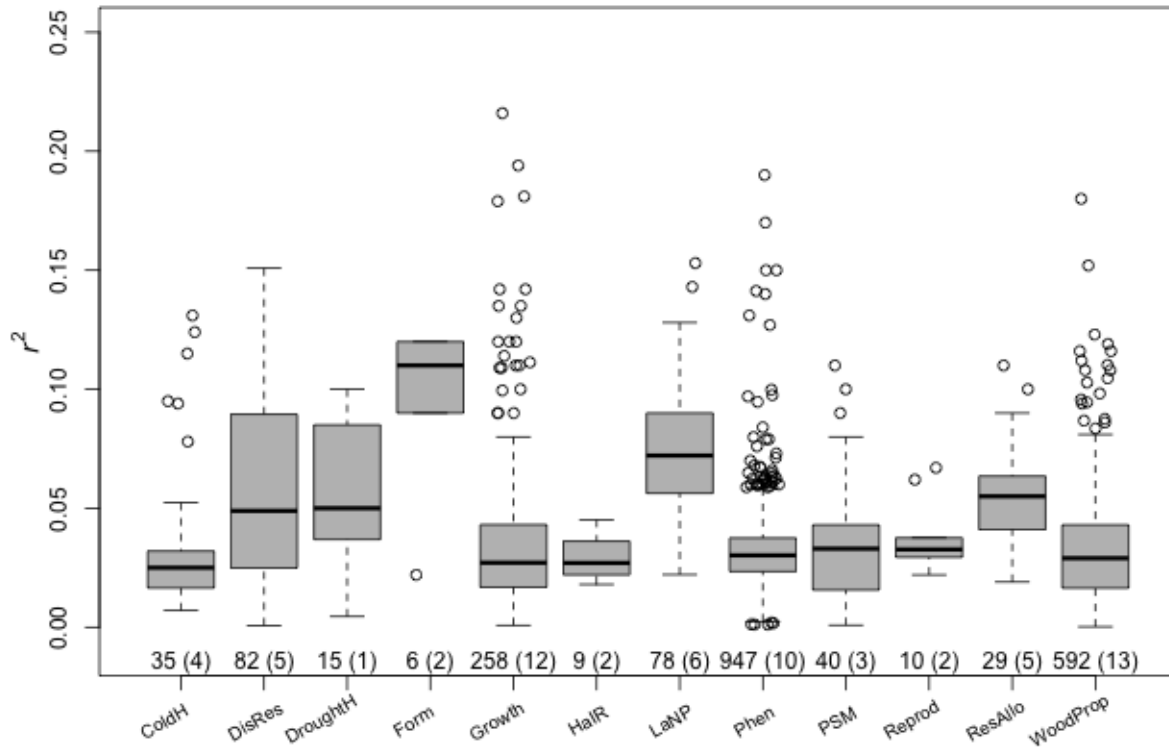

2125  
2126 **Figure 3B.** Distribution of per-locus percent variance explained ( $r^2$ ) values for trait groups  
2127 within genotype-phenotype literature review. Values along x-axis are total number of estimates  
2128 and number of species across estimates. Not shown are nine outliers for disease resistance to  
2129 *Cronartium ribicola* in *Pinus monticola* (range = [0.402, 1.0]) from Lui *et al.* 2017.  
2130 Abbreviations as in Figure 1.

## 2131 **Tables**

2132 **Table 1.** Where to next? The Path Forward identifies meaningful ways in which we can progress  
2133 our understanding of the architecture underlying complex traits in trees. Here we outline some  
2134 questions that can be used to guide future inquiry as the number of markers and sequence  
2135 length increase, and annotation becomes more precise and specific to tree biology.

- 2136
- 2137 1) Composition and evolution of genetic architectures in trees
    - 2138 a. How prevalent are non-additive contributions to underlying genetic architectures
    - 2139 in trees? Are there patterns across similar phenotypes or regulatory networks? Is
    - 2140 there evidence that such non-additive effects have either constrained or
    - 2141 facilitated local adaptation?
    - 2142 b. Are adaptive loci most prevalent in areas of low recombination or repetitive
    - 2143 sequences (e.g., retrotransposons, clustered gene families)? Do loci of similar
    - 2144 effect sizes, expression profiles, or pleiotropic effect (Lotterhos *et al.* 2017)
    - 2145 experience elevated LD within the genome? Should genome size influence our
    - 2146 expectations for underlying architectures (Mei *et al.* 2017)?
    - 2147 c. At what frequency does local adaptation result in fitness tradeoffs across
    - 2148 environments (Tiffin & Ross-Ibarra 2014; Wadgyamar *et al.* 2017)? And does this
    - 2149 interact with demographic history in trees?
    - 2150 d. Does pleiotropy play a predictable role in underlying tree genetic architectures
    - 2151 (Lotterhos *et al.* 2017)?
    - 2152 e. Which aspects of genetic architectures in trees are likely to exhibit deleterious
    - 2153 variation? And how much of this signal are we capturing in genotype-phenotype
    - 2154 applications?
  - 2155 2) Inter- and intraspecific variation of genetic architectures in trees
    - 2156 a. Which aspects of the genetic architecture should we expect to vary across
    - 2157 populations or environments?
    - 2158 b. Under what conditions in trees are we likely to observe genomic reorganization
    - 2159 across species or ecotypes (e.g., physical linkage or dispersion)? Will reference
    - 2160 genomes be suitable to assess this question across species or diverged
    - 2161 populations, or can long-read sequencing technologies (reviewed in Jiao &
    - 2162 Schneeberger 2017) offer appropriate resources?
    - 2163 c. What is the degree of convergent and parallel adaptation within polygenic
    - 2164 architectures across tree populations and species?
    - 2165 d. At what level of the genetic architecture do we see patterns of convergence,
    - 2166 parallelism, and divergence? Within core hubs, or perhaps within aspects of the
    - 2167 periphery? What does the comparison of the topologies from such architectures
    - 2168 tell us about influential evolutionary processes?
    - 2169 e. How often are architectures influenced by variation in expression levels rather
    - 2170 than structural variation in proteins? Do architectures differ in predictable ways
    - 2171 with the prevalence of one or the other? How can we utilize knowledge
    - 2172 synthesized across past approaches to spur understanding of underlying genetic
    - 2173 architectures in trees (Mizrachi *et al.* 2017)?

## 2174 **Boxes**

### 2175 **Box 1: A step in the right direction: Synergism between GWAS and Genomic Selection**

2176  
2177 Early simulations showcased the promise of predicting breeding values from marker data to  
2178 accelerate domestication and breeding of plants and animals (Meuwissen et al. 2001; Bernardo &  
2179 Yu 2007; Heffner et al. 2009; Zhong et al. 2009), and particularly under the framework of  
2180 genomic selection (GS) in trees (Wong & Bernardo 2008; Grattapaglia & Resende 2011; Iwata et  
2181 al. 2011; defined and reviewed by Grattapaglia 2017). Much of the early exploration into the  
2182 applicability of GS in trees discounted the utility of marker-assisted selection (MAS) because of  
2183 the small estimated effects for the few loci significantly associated via single-locus approaches at  
2184 the time, as well as having concerns related to replication because of the identification of  
2185 markers across limited parental (genetic) backgrounds (Grattapaglia & Resende 2011; Iwata et  
2186 al. 2011; Resende et al. 2012a, 2012b). Based on these arguments and results from simulations,  
2187 genomic selection was identified as a more promising endeavor than MAS, particularly if the  
2188 breeding cycle can be reduced via efforts such as grafting (Grattapaglia & Resende 2011) or  
2189 somatic embryogenesis (Resende et al. 2012a).

2190  
2191 While GS techniques often can explain a considerable proportion of narrow sense heritability,  
2192 current implementation of GS in trees is often on par with, or marginally better than, traditional  
2193 phenotypic selection when evaluating potential within the same generation and environment (see  
2194 Table 9.1 in Grattapaglia 2017). Further, the predictive accuracy of various models are a function  
2195 of underlying architecture (Resende et al. 2012c; Grattapaglia 2017). As pointed out by  
2196 Grattapaglia (2017), current marker densities have produced satisfactory results due to the  
2197 capture of relatedness between training and validation populations. Here, this success is likely  
2198 due to the ability of markers to reasonably represent large haplotype blocks (and thus cumulative  
2199 action of causative effects) due to the high level of relatedness between training and validation  
2200 populations. Even so, Grattapaglia (2017) recommends higher marker densities so that markers  
2201 also capture true marker-QTL LD and thus sustain long-term accuracies across generations and  
2202 environments. We also believe GWAS applications (in the broadest sense) in trees will also see  
2203 improvements through increased marker densities, the results of which can then be used to  
2204 further test specific hypotheses regarding underlying architectures and to increase predictive  
2205 accuracies of GS as well. Incorporating markers that putatively underlie the trait of interest into  
2206 model prediction may spur opportunities that do not require high degrees of relatedness between  
2207 training and validation populations, perhaps to the extent of incorporating material from outbred  
2208 stands using predictive approaches (*sensu* Béréños et al. 2014; Bontemps 2016) and heritability  
2209 validation (*sensu* Castellanos et al. 2015) in the field.

2210  
2211 In the end, the realized progress of our understanding regarding the genomics of complex traits  
2212 in trees will therefore be enhanced by the deposition of data from both GS and GWAS (as well  
2213 as other ‘omics’) approaches into a centralized open-access database hub such as TreeGenes  
2214 (treegenesdb.org). Future meta-analyses can then synthesize past inquiry to summarize our  
2215 current understanding of underlying genetic architectures, ultimately incorporating this  
2216 knowledge towards future applications in industry and conservation (see The Path Forward;  
2217 Table 1).

2218

2219

## SUPPLEMENTAL INFORMATION

2220

### The genomics of local adaptation in trees:

2221

### Are we out of the woods yet?

2222

Brandon M. Lind\*, Mitra Menon\*, Connie E. Bolte\*<sup>†</sup>,

2223

Trevor M. Faske<sup>†</sup>, and Andrew J. Eckert<sup>†</sup>

2224

\*Integrative Life Sciences, Virginia Commonwealth University, Richmond, Virginia 23284 USA

2225

<sup>†</sup>Department of Biology, Virginia Commonwealth University, Richmond, Virginia 23284 USA

2226

**Running Title:** Are we out of the woods yet?

2227

Corresponding Author:

2228

Brandon M. Lind

2229

1000 West Cary Street

2230

Life Science Bldg. - Department of Biology Rm 126

2231

Virginia Commonwealth University

2232

Richmond, Virginia 23284 USA

2233

e-mail: [lindb@vcu.edu](mailto:lindb@vcu.edu), fax: 804-828-0820

2234 **Supplemental Figures**

2235 **Figure S1**

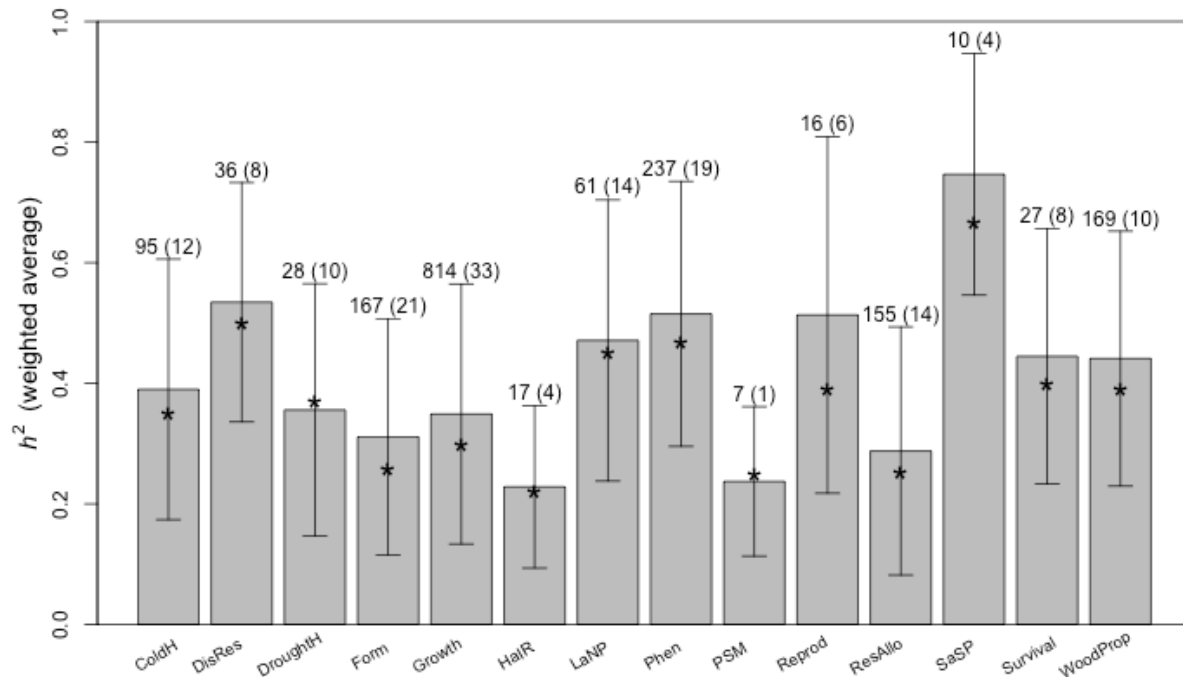

2236 **Figure S1.** Averages of narrow sense heritability calculated by weighting the number of families  
2237 used in each estimate of heritability. Error bars represent the standard deviation of the weighted  
2238 averages. Note that genetic variances in juvenile traits may be inflated due to instances of  
2239 maternal effects, which we did not control for in our literature survey. Abbreviations as in Figure  
2240 1 of the main text.  
2241

2242 **Figure S2**

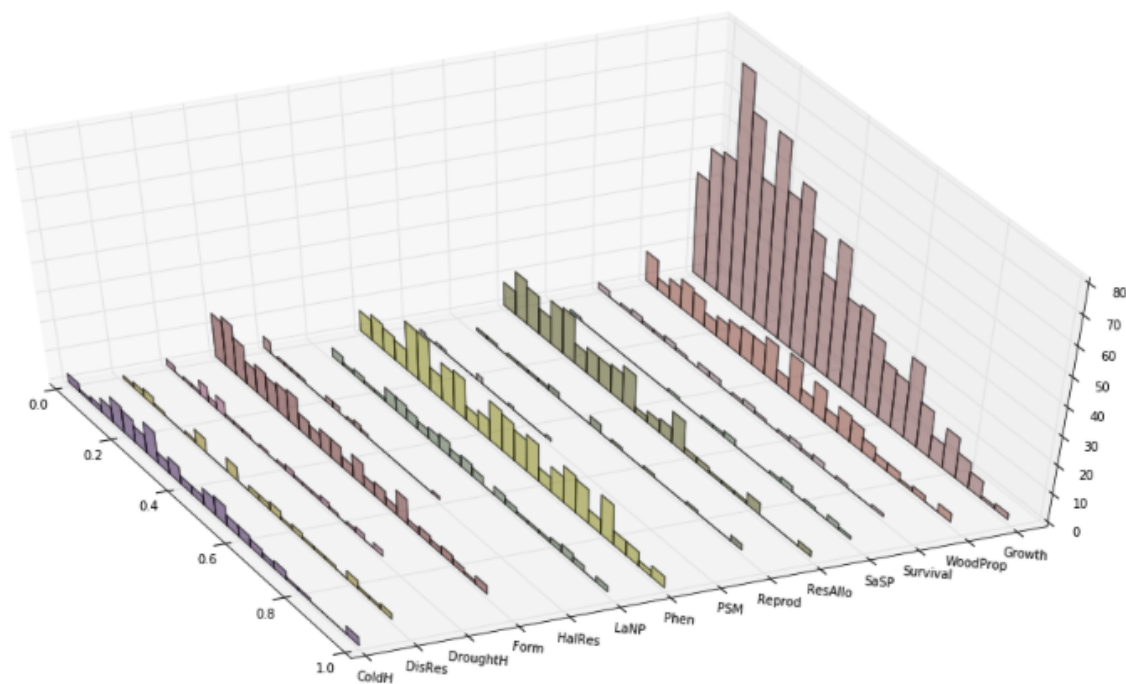

2243  
2244

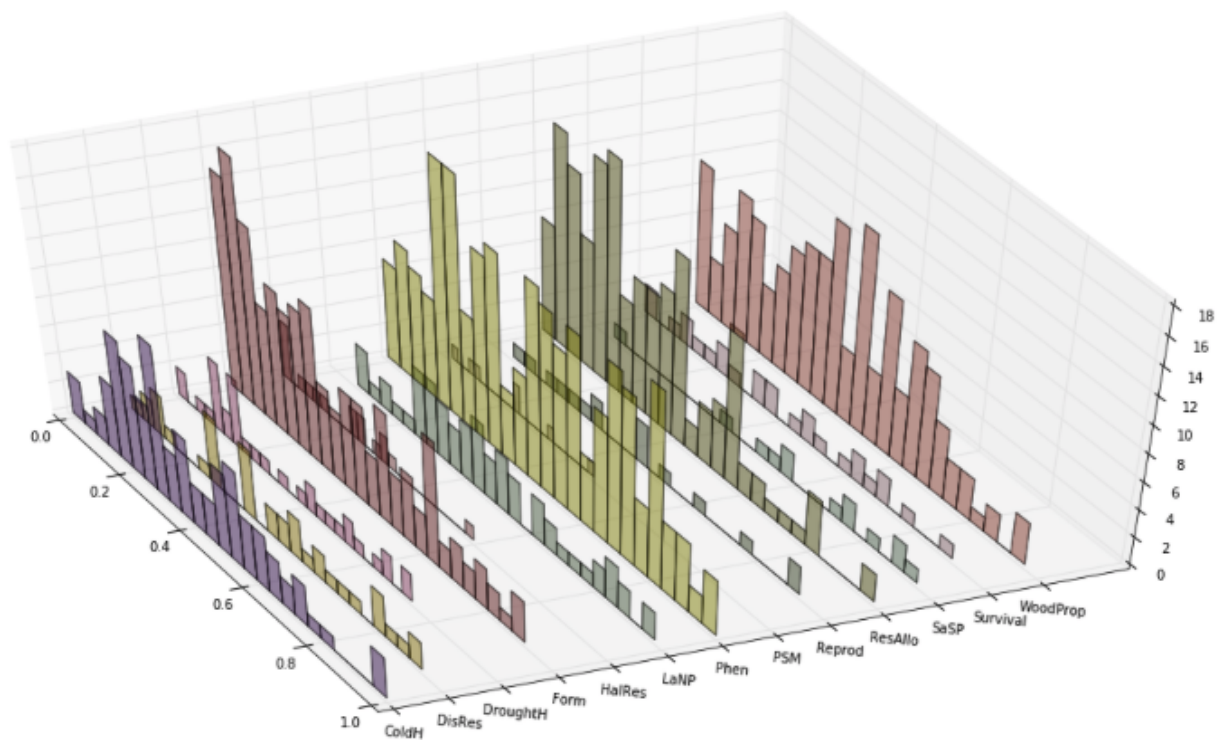

2245 **Figure S1.** Distributions of unweighted narrow sense heritability with (A) and without (B)  
2246 inclusion of the Growth distribution. Trait abbreviations as in Figure 1 of the main text.  
2247

2248 **Figure S3**

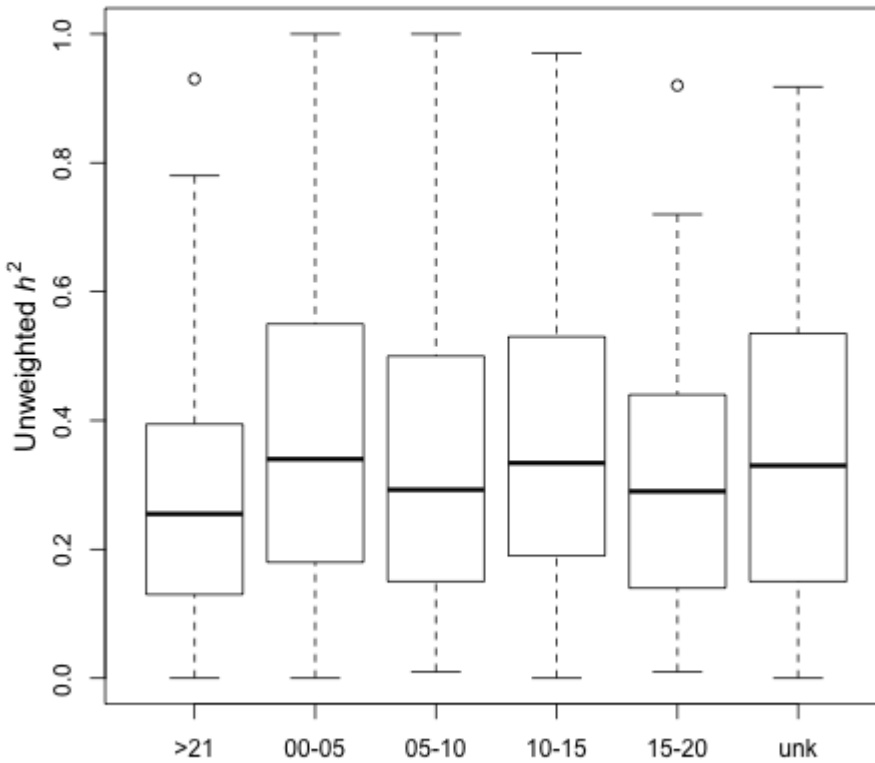

2249

2250

2251

**Figure S2.** Unweighted narrow sense heritability distributions by age (years). Unk = unknown age (i.e., not specified by article).

2252 **Figure S4**

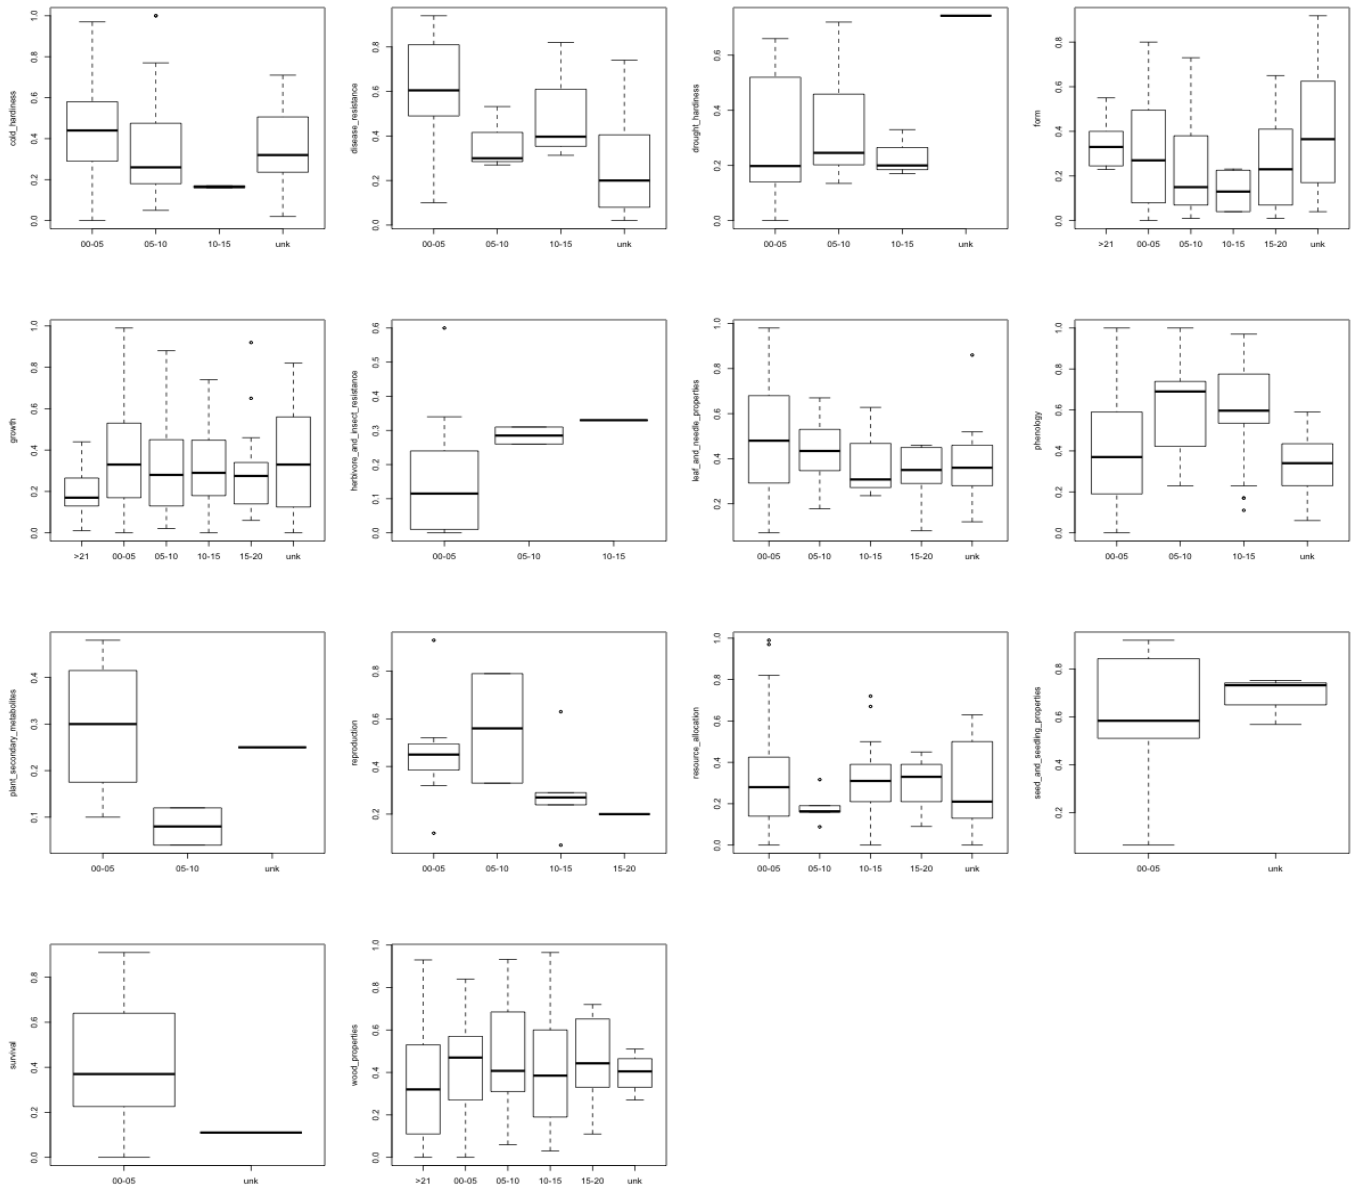

2253  
2254 **Figure S3.** Unweighted narrow sense heritability distributions by age (years) and by trait  
2255 category. Unk = unknown (i.e., not specified by article)



2256 **Figure S5**

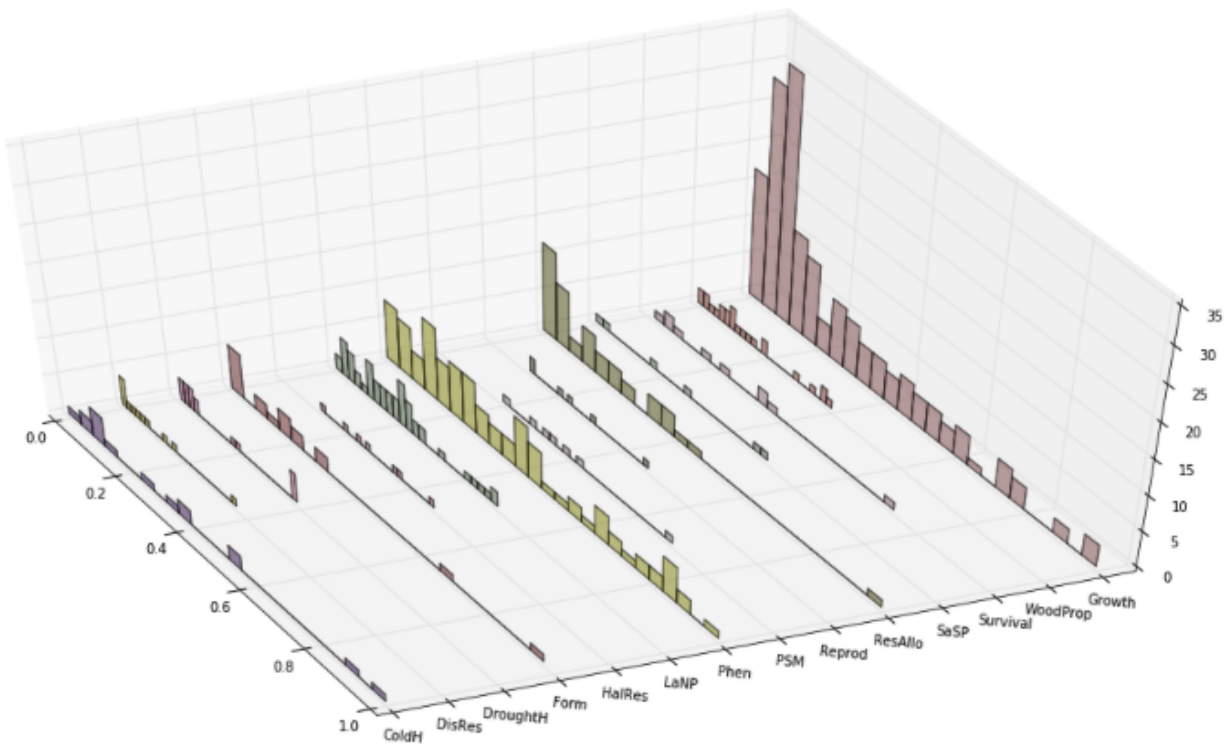

2257  
2258 **Figure S4.** Distributions of unweighted QST estimates from literature survey. Abbreviations as  
2259 in Figure 1 of the main text.

## 2260 Supplemental Tables

### 2261 Table S1

| Trait Group                     | Total measurements | Total species | Angiosperm meas. | Gymnosperm meas. | Eucalypt meas. | Pine meas. | Populus meas. |
|---------------------------------|--------------------|---------------|------------------|------------------|----------------|------------|---------------|
| Cold hardiness                  | 16                 | 5             | 3                | 13               | 0              | 10         | 2             |
| Disease resistance              | 12                 | 3             | 3                | 9                | 0              | 9          | 3             |
| Drought hardiness               | 11                 | 5             | 5                | 6                | 0              | 3          | 4             |
| Form                            | 18                 | 6             | 15               | 3                | 1              | 3          | 12            |
| Growth                          | 170                | 25            | 73               | 97               | 13             | 74         | 44            |
| Herbivore and insect resistance | 7                  | 2             | 7                | 0                | 6              | 0          | 0             |
| Leaf and needle properties      | 52                 | 14            | 44               | 8                | 11             | 5          | 12            |
| Phenology                       | 91                 | 9             | 63               | 28               | 0              | 16         | 53            |
| Plant secondary metabolites     | 7                  | 1             | 7                | 0                | 7              | 0          | 0             |
| Reproduction                    | 6                  | 2             | 2                | 4                | 2              | 4          | 0             |
| Resource allocation             | 40                 | 10            | 16               | 24               | 3              | 22         | 10            |
| Seed and seedling properties    | 6                  | 3             | 2                | 4                | 0              | 0          | 0             |
| Survival                        | 10                 | 5             | 2                | 8                | 2              | 8          | 0             |
| Wood properties                 | 23                 | 8             | 14               | 9                | 8              | 4          | 5             |

2262 **Table 2.** Summary of total and per-species measurements used in literature review of  
 2263 differentiation of quantitative genetic variation ( $Q_{ST}$ ). The Total Species column is the number of  
 2264 unique species in our survey, whereas the remaining columns provide the total number of  
 2265 measurements per category.

2266 **Table S2**

| trait Group                     | Total measurements | Total species | Angiosperm measurements | Gymnosperm measurements | Eucalypt meas. | Pine meas. | Populus meas. |
|---------------------------------|--------------------|---------------|-------------------------|-------------------------|----------------|------------|---------------|
| old hardness                    | 35                 | 4             | 2                       | 33                      | 0              | 0          | 2             |
| disease resistance              | 82                 | 5             | 31                      | 51                      | 0              | 51         | 30            |
| tough hardness                  | 15                 | 1             | 0                       | 15                      | 0              | 15         | 0             |
| form                            | 10                 | 3             | 4                       | 6                       | 0              | 5          | 4             |
| growth                          | 258                | 12            | 205                     | 53                      | 44             | 17         | 152           |
| herbivore and insect resistance | 9                  | 2             | 9                       | 0                       | 6              | 0          | 3             |
| leaf and needle properties      | 78                 | 6             | 58                      | 20                      | 0              | 5          | 45            |
| phenology                       | 947                | 10            | 886                     | 61                      | 0              | 0          | 846           |
| plant secondary metabolites     | 52                 | 3             | 32                      | 20                      | 29             | 20         | 3             |
| reproduction                    | 10                 | 2             | 0                       | 10                      | 0              | 9          | 0             |
| resource allocation             | 29                 | 5             | 19                      | 10                      | 4              | 8          | 15            |
| wood properties                 | 588                | 12            | 410                     | 178                     | 94             | 136        | 312           |

2267 **Table 3.** Summary of total and per-species measurements used in literature review of percent  
 2268 phenotypic variance explained by associated markers ( $r^2$ ). The Total Species column is the  
 2269 number of unique species in our survey, whereas the remaining columns provide the total  
 2270 number of measurements per category.

## 2271 **BOXES**

### 2272 **Supplemental Box S1**

#### 2273 **Basic Concepts from Quantitative Genetics**

2274  
2275 We follow the traditional decomposition of phenotypes into genetic and environmental components, which  
2276 forms the basis of quantitative genetics (Fisher 1918, Lynch & Walsh 1998, Charlesworth & Charlesworth  
2277 2010, reviewed by Hill 2010). The phenotype of an individual (P) can be decomposed into effects from its  
2278 genotype (G), its environment (E), and the interaction between its genotype and environment (GxE).  
2279 Typically, this is thought of as deviations from the population mean, with each causative locus having two  
2280 alleles. Using this framework, phenotypic variance ( $\sigma^2_P$ ) can be decomposed into genotypic variance  
2281 ( $\sigma^2_G$ ), environmental variance ( $\sigma^2_E$ ) and the variance due to the interaction between genotypes and  
2282 environments ( $\sigma^2_{G \times E}$ ):  
2283

$$2284 \sigma^2_P = \sigma^2_G + \sigma^2_E + \sigma^2_{G \times E}$$

2286 For a single locus,  $\sigma^2_G$  can be decomposed into variances arising from additive ( $\sigma^2_A$ ) and dominance ( $\sigma^2_D$ )  
2287 effects (Fig. 1). For multiple loci,  $\sigma^2_G$  can be decomposed into variances arising from additive, dominance,  
2288 and epistatic ( $\sigma^2_I$ ) effects, with the total additive effect across loci being the summation of the effects at  
2289 each of the causative loci. Dominance and epistatic effects are jointly termed non-additive effects. Thus,  
2290 the previous equation can be expanded to the following:  
2291

$$2292 \sigma^2_P = \sigma^2_A + \sigma^2_D + \sigma^2_I + \sigma^2_E + \sigma^2_{G \times E}$$

2294 The decomposition of  $\sigma^2_G$  into different types of effects provides a way of estimating narrow-sense  
2295 heritability ( $h^2$ ), which is defined as the ratio of additive genetic variance ( $\sigma^2_A$ ) to total phenotypic variance  
2296 ( $\sigma^2_P$ ). For tree populations, this is often accomplished through variance partitioning techniques  
2297 (Namkoong 1979) using half-sib designs in common gardens (White et al. 2007) or using molecular  
2298 markers to estimate relatedness in the field (cf. Ritland & Ritland 1996). In the case of half-sib designs, if  
2299 the assumptions of free recombination and little epistasis among causative loci, random mating, and lack  
2300 of environmental covariance among sibs are satisfied,  $\sigma^2_A$  is given by (Lynch & Walsh 1998):  
2301

$$2302 \sigma^2_A = 4\sigma^2_F$$

2304 where  $\sigma^2_F$  is the variance due to family (e.g., as extracted from a linear mixed model). Hence, for a half-  
2305 sib design,  $h^2 = 4\sigma^2_F/\sigma^2_P$ . Other sibling designs are possible, with the 4 in the previous equation replaced  
2306 by  $1/r$ , where  $r$  is the coefficient of relationship (e.g., Whitlock & Gilbert 2012). Clonal and controlled  
2307 mating designs are also often used for estimation of heritability, often broad-sense heritability (Namkoong  
2308 1979; White et al. 2007). When families are nested into populations, and an estimate of the among  
2309 population variance component is made, these are the components also used to estimate  $Q_{ST}$  (Spize  
2310 1993; Prout & Barker 1993). When compared against estimates of  $F_{ST}$  using a similar variance  
2311 decomposition procedure (e.g., Yang 1998) and a method suitable to account for the substantial variance  
2312 associated with these components (e.g., Whitlock & Guillaume 2009) conclusions about local adaptation  
2313 can be reached.  
2314

2315 Heritability estimates are population, environment, and time specific, as evidenced by the relationship  
2316 between  $\sigma^2_A$  and allele frequencies within populations (Lynch & Walsh 1998; e.g. Berg & Coop 2014):  
2317

$$2318 \sigma^2_A = 2 \sum_{i=1}^L \alpha_i^2 p_i (1 - p_i)$$

2319 where the summation is over the number of causative loci ( $L$ ),  $\alpha$  is the average effect of allelic substitution  
2320 at each locus (Fig. 1), and  $p_i$  is the frequency of one of the alleles at each of the causative loci. Thus, any  
2321 evolutionary force altering  $p$  at some or all of the causative loci will change  $\sigma^2_A$  (cf. Box 3.7 in  
2322 Charlesworth & Charlesworth 2010). Heritability is also uninformative about the underlying architecture  
2323 itself, as are the relative magnitudes of the different variance components themselves (Huang & Mackay  
2324 2016), and can often be misleading about evolutionary potential (Hansen et al. 2011).  
2325

## 2326 **Supplemental Box S2**

### 2327 **Brief introduction to methods for single-locus genetic association analysis**

2328  
2329 Detecting associations between genetic markers and complex trait variation relies on fitting and  
2330 evaluating linear models, typically of the form:

$$2331 \mathbf{y} = \mathbf{X}\boldsymbol{\beta} + \mathbf{Z}\mathbf{u} + \mathbf{e},$$

2332  
2333 where  $\mathbf{y}$  is a vector of observed or inferred phenotypic values,  $\boldsymbol{\beta}$  and  $\mathbf{u}$  are vectors of random and fixed  
2334 effects, respectively,  $\mathbf{X}$  and  $\mathbf{Z}$  are design matrices associated with  $\boldsymbol{\beta}$  and  $\mathbf{u}$ , and  $\mathbf{e}$  is a vector of residuals  
2335 (Yu et al. 2005). In the simplest model, the phenotype ( $\mathbf{y}$ ) is modeled as a function of genetic effects at a  
2336 single locus, represented by marker genotypes for the samples comprising values in  $\mathbf{y}$ , and covariates  
2337 describing relatedness among sampled trees and the structure among populations from which those trees  
2338 were sampled. Genetic effects are encoded based on *a priori* assumptions about the underlying  
2339 architecture of the phenotypic trait under consideration, with the most frequent encoding being that for  
2340 additive effects (e.g., counts of a reference allele) considered as either fixed or random effects (Goddard  
2341 et al. 2009). Phenotypic values are often estimates derived through analysis of materials established  
2342 within common gardens, either from clones or sibships, from which estimates of the genetic values of  
2343 unmeasured trees (e.g., maternal trees for which markers have been genotyped) are made using the  
2344 theory of Best Linear Unbiased Predictors (BLUPs; Henderson 1975; Searle et al. 1992; Piepho et al.  
2345 2008). Inclusion of only fixed effects results in a General Linear Model (GLM), whereas a mixture of fixed  
2346 and random effects results in a Mixed Linear Model (MLM or LMM). The use of covariates is necessary to  
2347 avoid identification of false positive associations arising from the confounding between neutral genetic  
2348 and phenotypic variation due to demographic history and the analysis of relatives (Devlin & Roeder 1999;  
2349 Yu et al. 2005; Price et al. 2006).

2350  
2351 Models as described above are typically fitted and evaluated using restricted maximum likelihood (REML,  
2352 Patterson & Thompson 1971), although Bayesian methods are available and have the advantage of  
2353 specifying *a priori* assumptions more clearly, remove the distinction between fixed and random effects,  
2354 and are more applicable to testing biologically realistic models (Stephens & Balding 2009). Output from  
2355 these models include estimates of effect sizes for markers (e.g.  $r^2$ , coefficients for random effects,  
2356 genotypic trait means) and, when used in a frequentist framework, probability values ( $p$ -values) of  
2357 observing test statistics under a null model. Bayesian methods, in contrast, provide strength of evidence  
2358 measures such as Bayes Factors for the association of each marker to the phenotype of interest. The  
2359 ability to discover and correctly quantify effect sizes of true positives (i.e. causative markers or indirect  
2360 associations resulting from linkage to causative markers) is dependent upon experimental design,  
2361 including design of genotyping assays, and sample sizes (Long & Langley 1999; Zöllner and Pritchard  
2362 2007; Spencer et al. 2009), as well as genome-wide patterns of linkage disequilibrium relative to the  
2363 density of markers in the genome, the genetic distance between the indirectly associated marker and the  
2364 causative locus, and the true underlying genetic architecture of the phenotypic trait under consideration  
2365 (Platt et al. 2010; Prichard et al. 2010; Caballero et al. 2015).

2366  
2367 One model is typically fitted and evaluated per marker-phenotypic trait combination (but see e.g. Wegrzyn  
2368 et al. 2010 for haplotype analysis). Even without the issue of confounding described above, this increases  
2369 the likelihood of false positives arising solely from performing many statistical tests. A variety of methods  
2370 exist to deal with multiple testing, with the most popular methods being those based on the false  
2371 discovery rate (Storey & Tibshirani 2003) and permutation (Hirschhorn & Daly 2005). Additional methods  
2372 exist for situations where the multiple tests are not independent from one another (e.g. linkage  
2373 disequilibrium among markers, see Johnson et al. 2010) or when permutation analysis is problematic  
2374 (Joo et al. 2016).

## 2376 **Supplemental References**

- 2377 Caballero A, Tenesa A, Keightley PD (2015) The nature of genetic variation for complex traits  
2378 revealed by GWAS and regional heritability mapping analyses. *Genetics* 201:1601-1613.
- 2379 Devlin B, Roeder K (1999) Genomic control for association studies. *Biometrics* 55:997-1004.
- 2380 Goddard ME, Wray NR, Verbyla K, Visscher PM (2009) Estimating effects and making  
2381 predictions from genome-wide marker data. *Statistical Science* 24:517-529.
- 2382 Henderson CR (1975) Best linear unbiased estimation and prediction under a selection model.  
2383 *Biometrics* 31:423-447.
- 2384 Hirschhorn JN, Daly MJ (2005) Genome-wide association studies for common diseases and  
2385 complex traits. *Nature Reviews Genetics* 6:95-108.
- 2386 Johnson RC, Nelson GW, Troyer JL, et al (2010) Accounting for multiple comparisons in a  
2387 genome-wide association study (GWAS). *BMC Genomics* 11:724.
- 2388 Joo JWJ, Hormozdiari F, Han B, Eskin E (2016) Multiple testing correction in linear mixed  
2389 models. *Genome Biology* 17:62.
- 2390 Long AD, Langley CH (1999) The power of association studies to detect the contribution of  
2391 candidate genetic loci to variation in complex traits. *Genome Research* 9:720-731.
- 2392 Patterson HD, Thompson R (1971) Recovery of interblock information when block sizes are  
2393 unequal. *Biometrika* 58:545-554.
- 2394 Piepho HP, Möhring J, Melchinger AE, Büchse A (2008) BLUP for phenotypic selection in plant  
2395 breeding and variety testing. *Euphytica* 161:209-228.
- 2396 Platt A, Vilhjalmsón BJ, Nordborg M (2010) Conditions under which genome-wide association  
2397 studies will be positively misleading. *Genetics* 186:1045-1052.
- 2398 Price AL, Patterson NJ, Plenge RM, Weinblatt ME, Shadick NA, Reich D (2006) Principal  
2399 components analysis corrects for stratification in genome-wide association studies. *Nature*  
2400 *Genetics* 38:904-909.
- 2401 Pritchard JK, Pickrell JK, Coop G (2010) The Genetics of Human Adaptation: Hard Review  
2402 Sweeps, Soft Sweeps, and Polygenic Adaptation. *Current Biology* 20:R208–R215. doi:  
2403 10.1016/j.cub.2009.11.055
- 2404 Searle SR, Casella G, McCulloch CE (1992) *Variance Components*. New York, NY: John Wiley  
2405 & Sons, Inc. 528 pp.

- 2406 Spencer CCA, Su Z, Donnelly P, Marchini J (2009) Designing genome-wide association studies:  
2407 sample size, power, imputation, and the choice of genotyping chip. PLoS Genetics  
2408 5:e1000477.
- 2409 Stephens M, Balding DJ (2009) Bayesian statistical methods for genetic association studies.  
2410 Nature Reviews Genetics 10:681-690.
- 2411 Storey JD, Tibshirani R (2003) Statistical significance for genomewide studies. Proceedings of  
2412 the National Academy of Sciences of the United States of America 100:9440-9445.
- 2413 Wegrzyn JL, Eckert AJ, Choi M, et al (2010) Association genetics of traits controlling lignin and  
2414 cellulose biosynthesis in black cottonwood (*Populus trichocarpa*, Salicaceae) secondary  
2415 xylem. New Phytologist 188:515–532. doi: 10.1111/j.1469-8137.2010.03415.x
- 2416 Yu J, Pressoir G, Briggs WH, Vroh Bi I, Yamasaki M et al. (2005) A unified mixed-model  
2417 method for association mapping that accounts for multiple levels of relatedness. Nature  
2418 Genetics 38:203-208.
- 2419 Zöllner S, Pritchard JK (2007) Overcoming the Winner’s Curse: Estimating Penetrance  
2420 Parameters from Case-Control Data. The American Journal of Human Genetics 80:605–615.
